# Supplementary material for: One-pot reductive coupling of N-acylcarbamates with activated alkenes: application to the asymmetric synthesis of pyrrolo[1,2-a]azepin-5-one ring system and (−)-xenovenine
Source: Royal Society of Chemistry journal article supplement (doi:10.1039/c1ob06697h), 2011-11-17
Supplement: c1ob06697h.pdf [file c1ob06697h.pdf]

## SUPPORTING INFORMATION

### One-Pot Reductive Coupling of *N*-Acylcarbamates with Activated Alkenes: Application to the Asymmetric Synthesis of Pyrrolo[1,2-*a*]azepin-5-one Ring System and (–)-Xenovenine

Xue-Kui Liu,<sup>a</sup> Xiao Zheng,<sup>a</sup> Yuan-Ping Ruan,<sup>a</sup> Jie Ma,<sup>a</sup> and Pei-Qiang Huang\*<sup>a, b</sup>

<sup>a</sup> Department of Chemistry and The Key Laboratory for Chemical Biology of Fujian Province, College of Chemistry and Chemical Engineering, Xiamen University, Xiamen, Fujian 361005, P. R. China; <sup>b</sup> The State Key Laboratory of Elemento-Organic Chemistry, Nankai University, Tianjin 300071, P. R. China

E-mail: [pqhuang@xmu.edu.cn](mailto:pqhuang@xmu.edu.cn)

#### Contents

|                                                                                             |      |
|---------------------------------------------------------------------------------------------|------|
| <b><sup>1</sup>H and <sup>13</sup>C NMR Spectra of all New Compounds and (–)-Xenovenine</b> | S-2  |
| <b>Variable Temperature <sup>1</sup>H NMR of Compound 3e</b>                                | S-11 |
| <b>2D-COSY Spectrum of Compound 16</b>                                                      | S-59 |
| <b>2D-NOESY Spectrum of Compound 16</b>                                                     | S-60 |
| <b>1D-GOESY Spectrum of Compound 16</b>                                                     | S-61 |

$^1\text{H}$  NMR and  $^{13}\text{C}$  NMR data of compound **3a**:

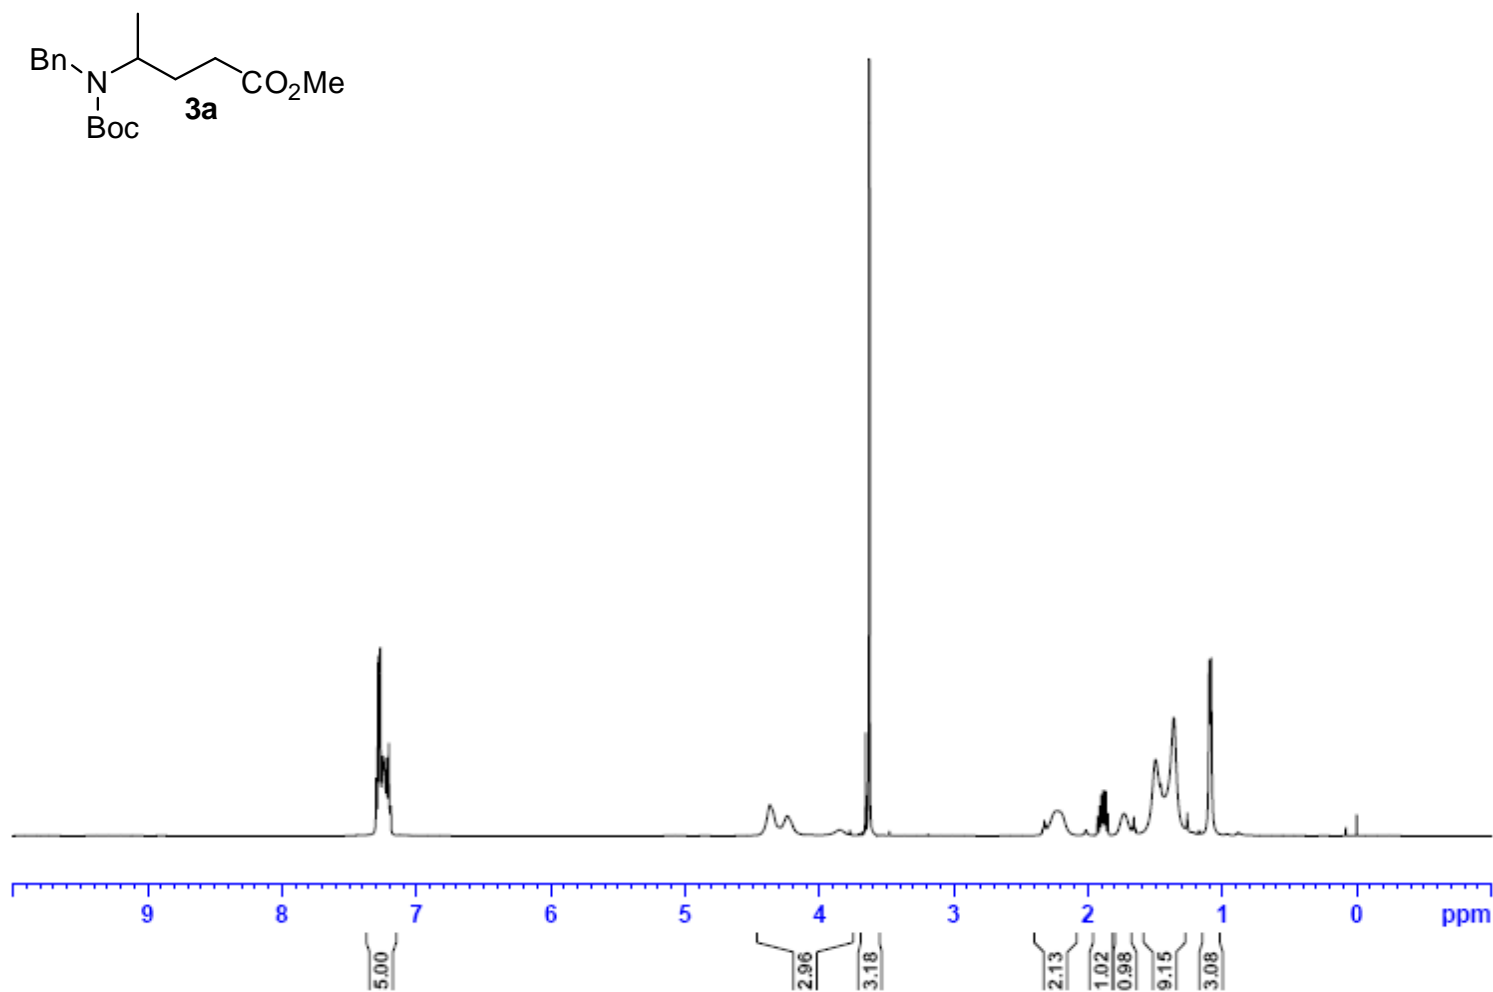

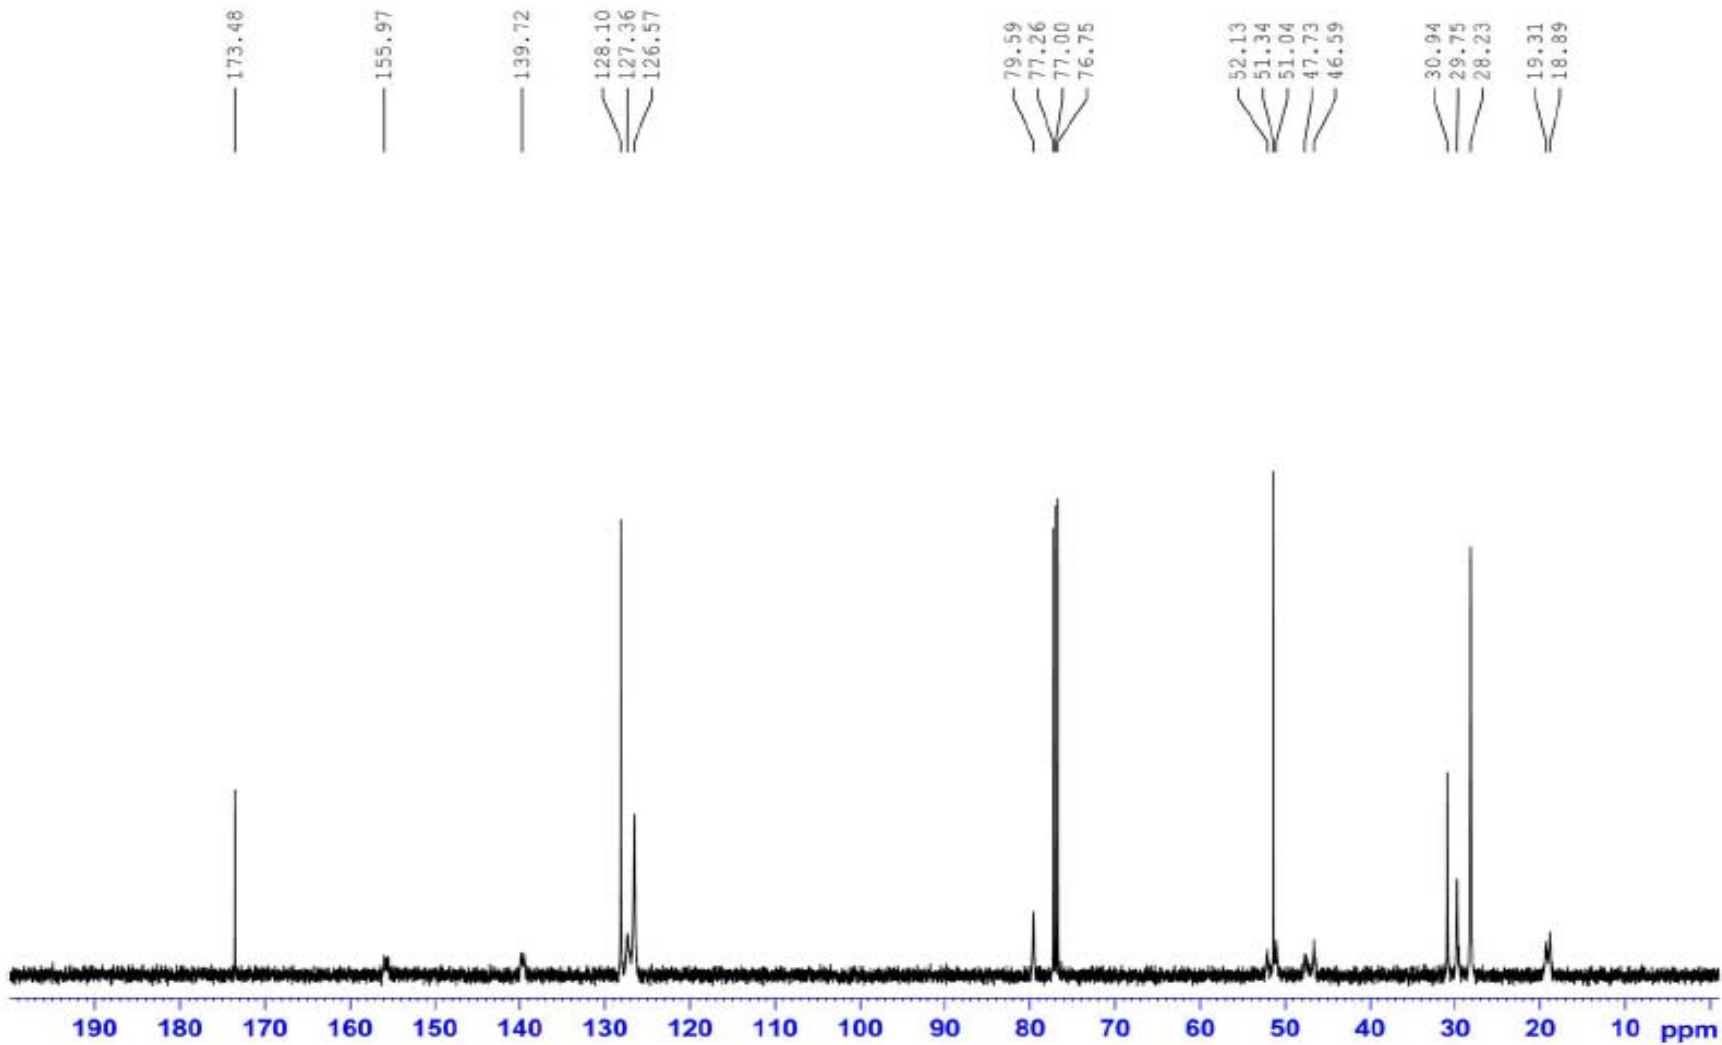

$^1\text{H}$  NMR and  $^{13}\text{C}$  NMR data of compound **3b**:

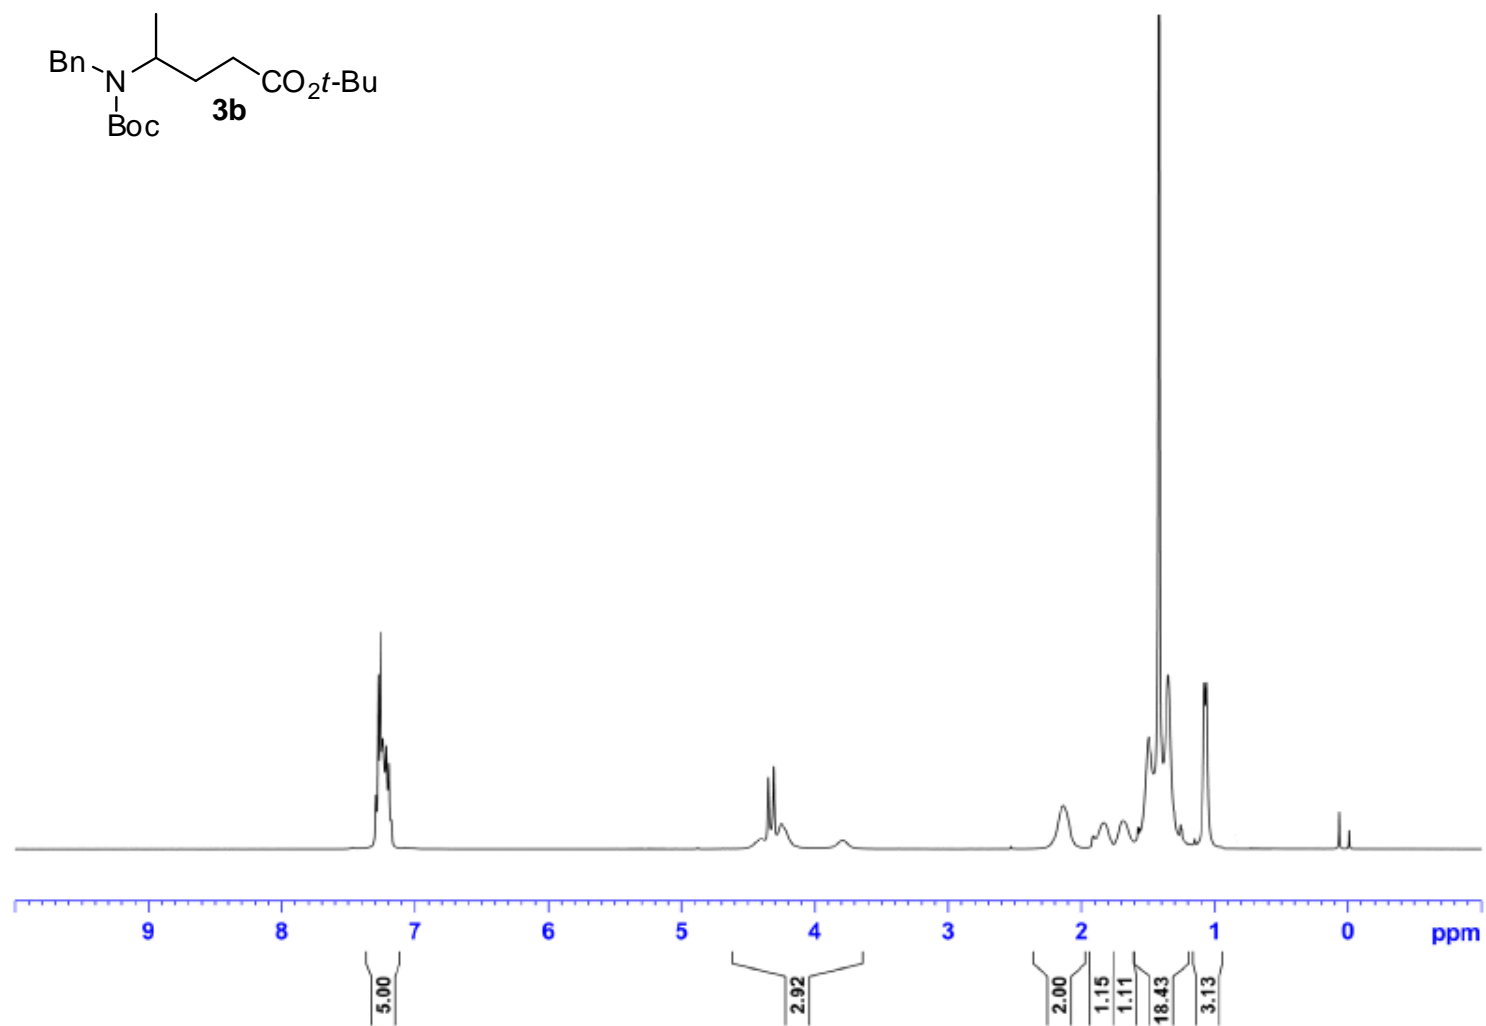

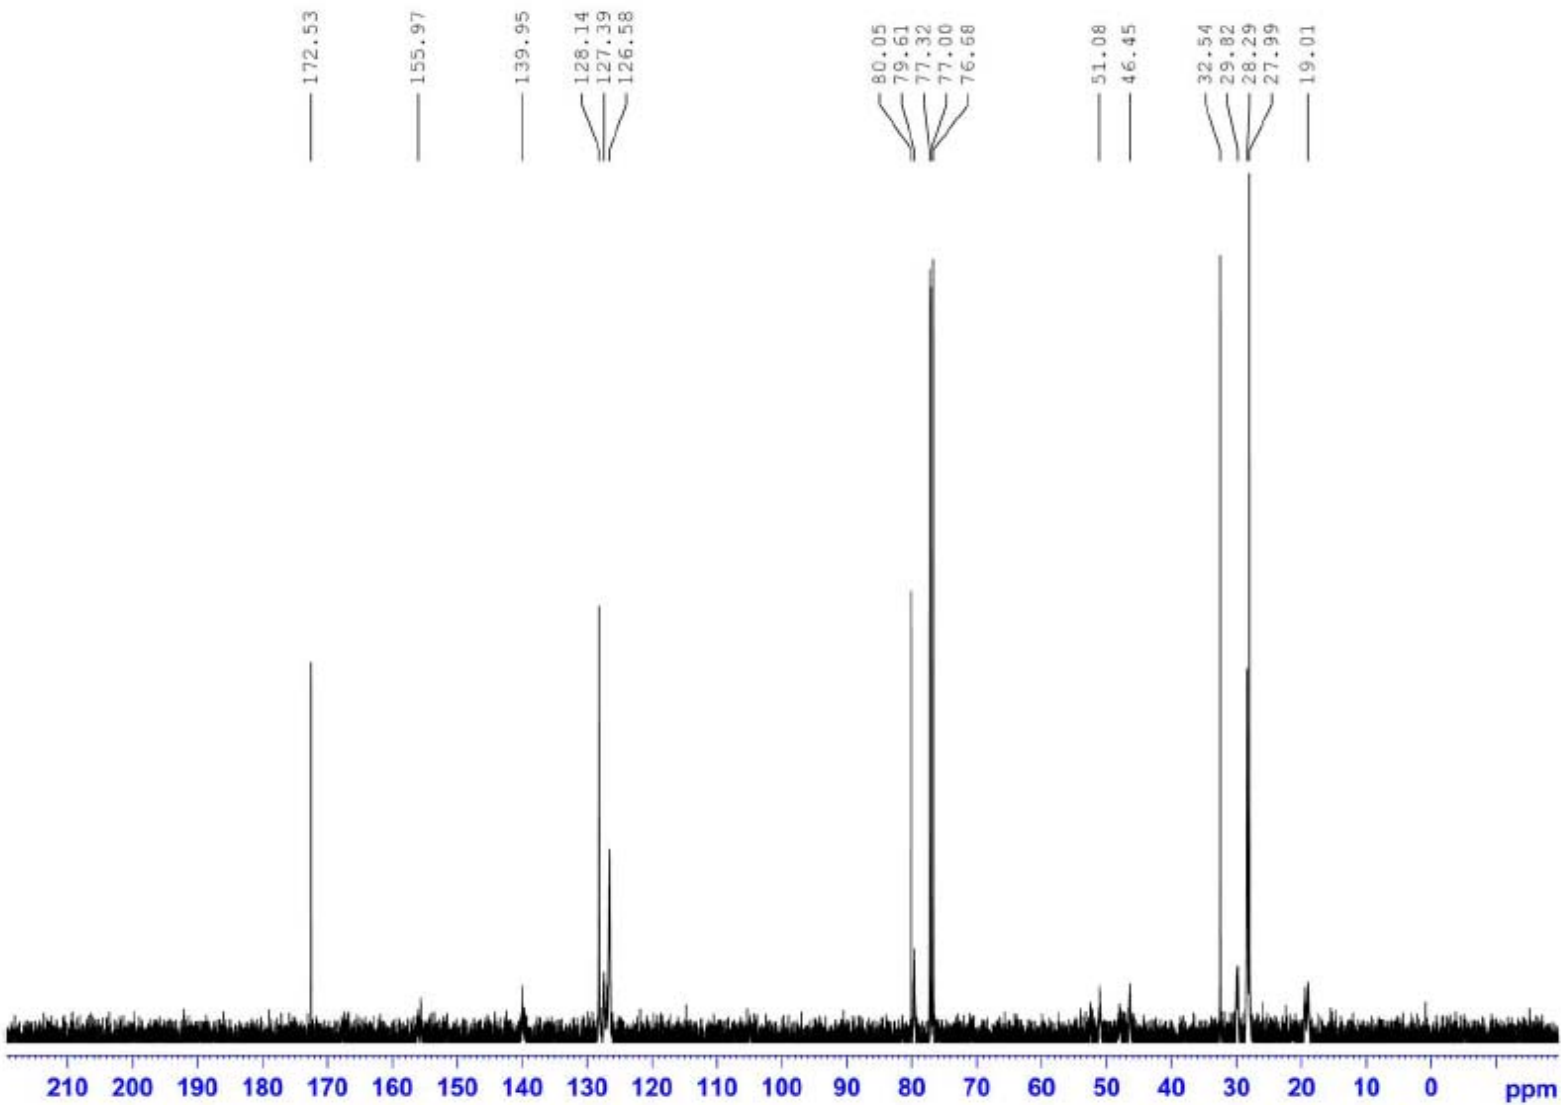

$^1\text{H}$  NMR and  $^{13}\text{C}$  NMR data of compound **3c**:

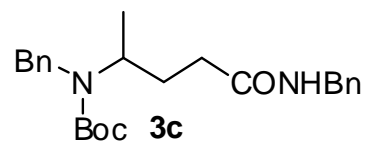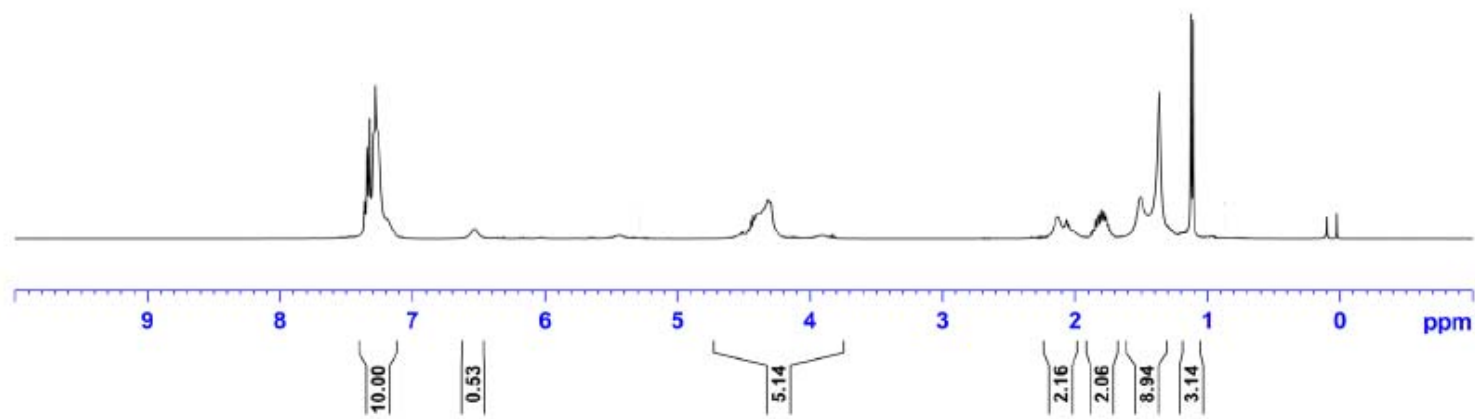

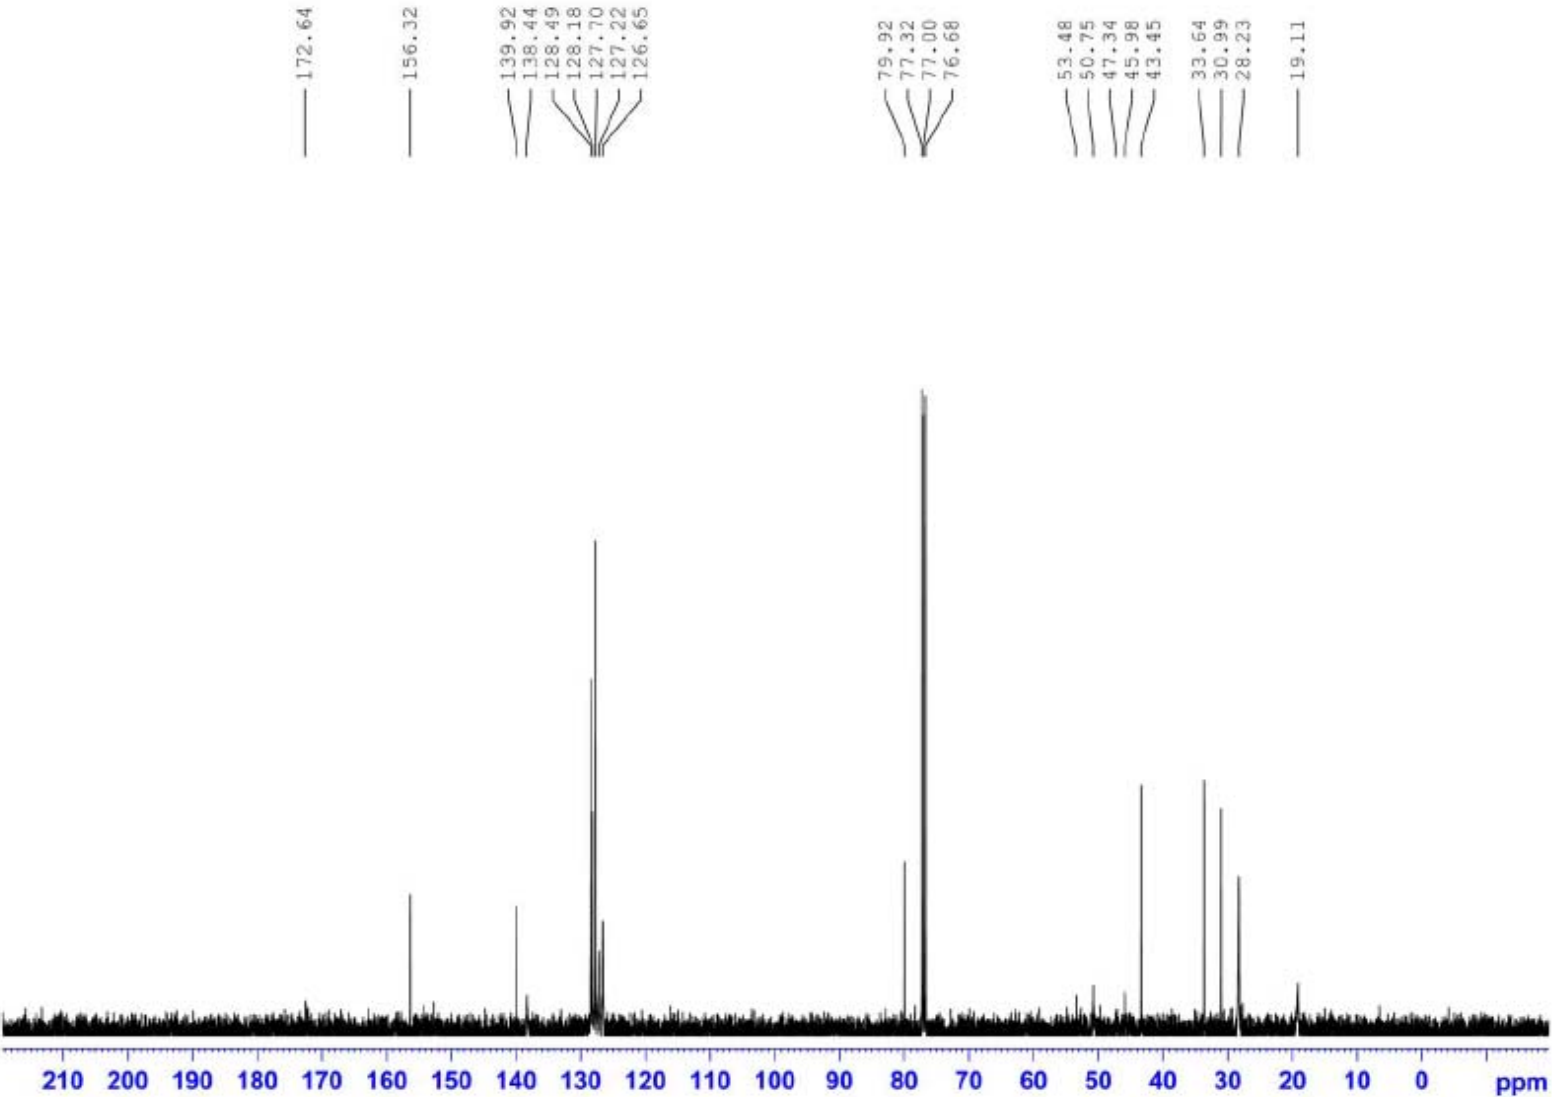

$^1\text{H}$  NMR and  $^{13}\text{C}$  NMR data of compound **3d**:

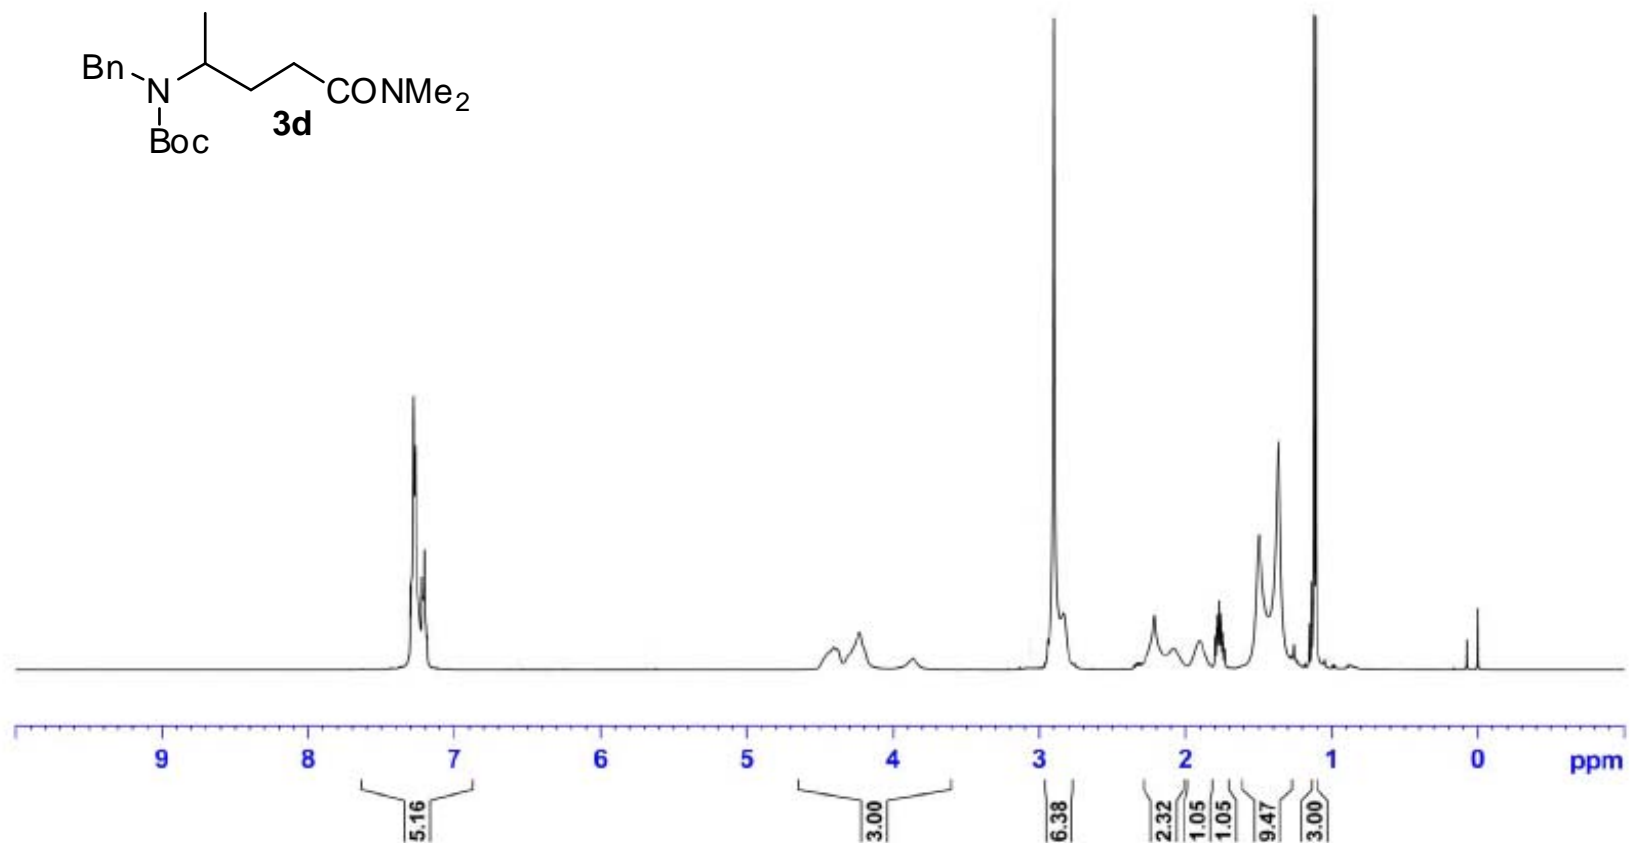



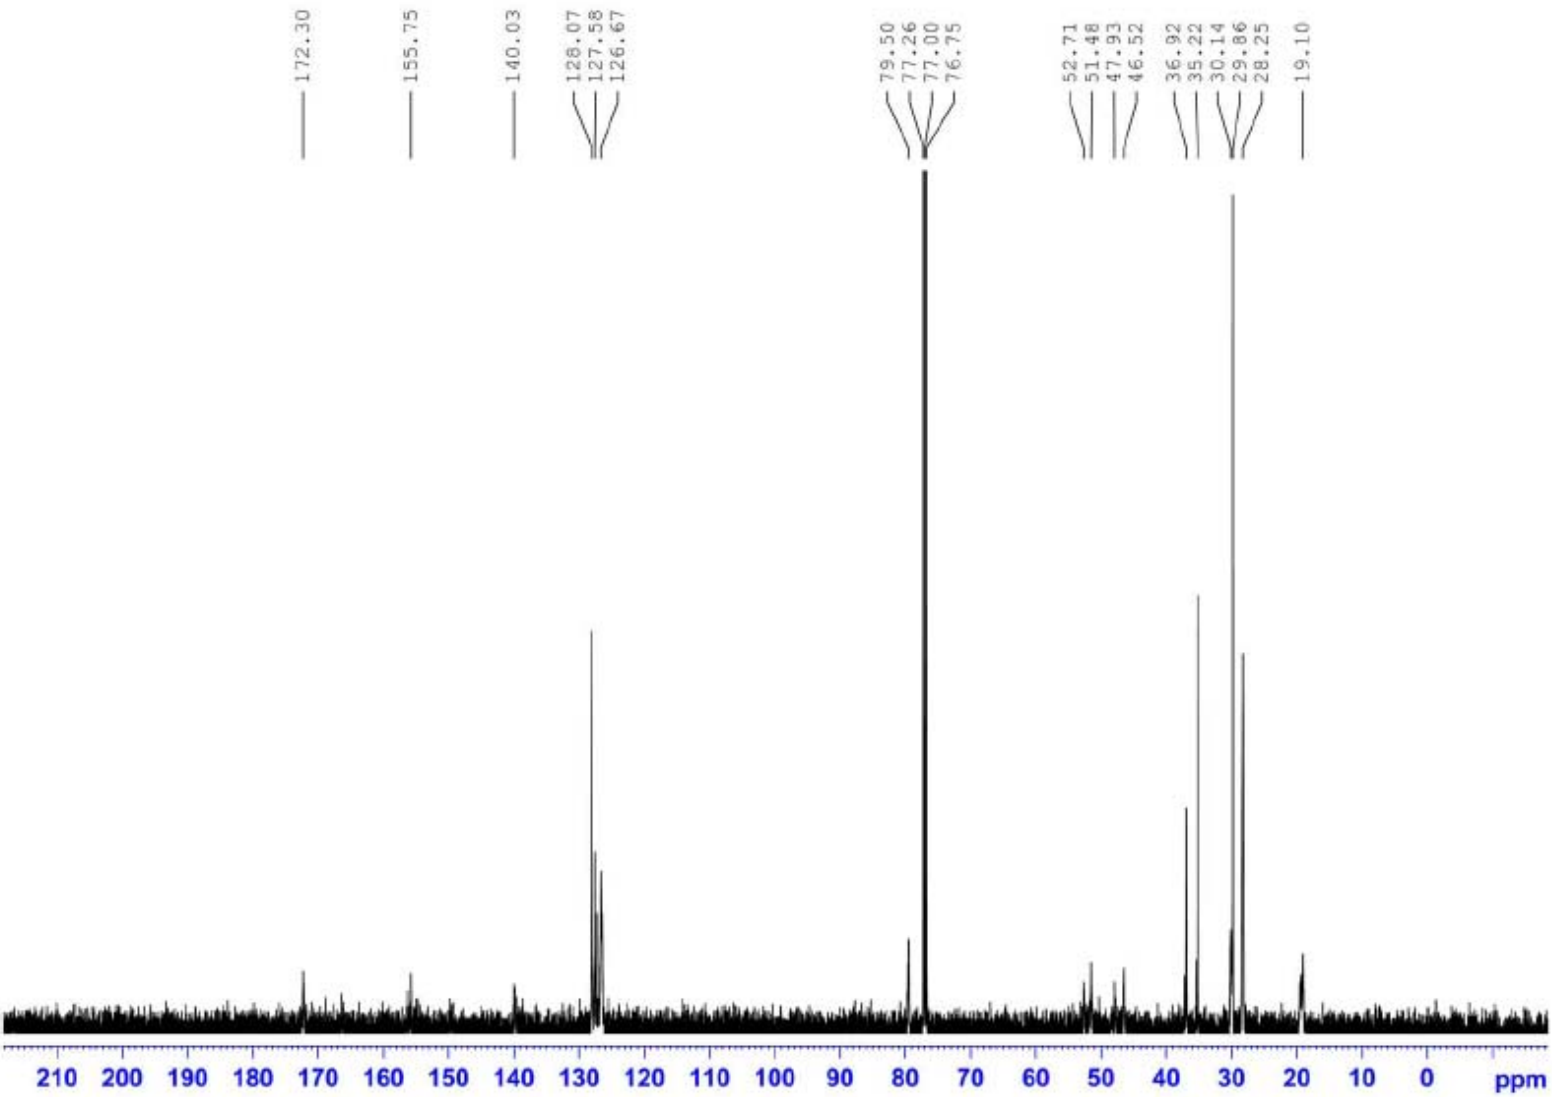

$^1\text{H}$  NMR, VT  $^1\text{H}$  NMR and  $^{13}\text{C}$  NMR data of compound **3e**:

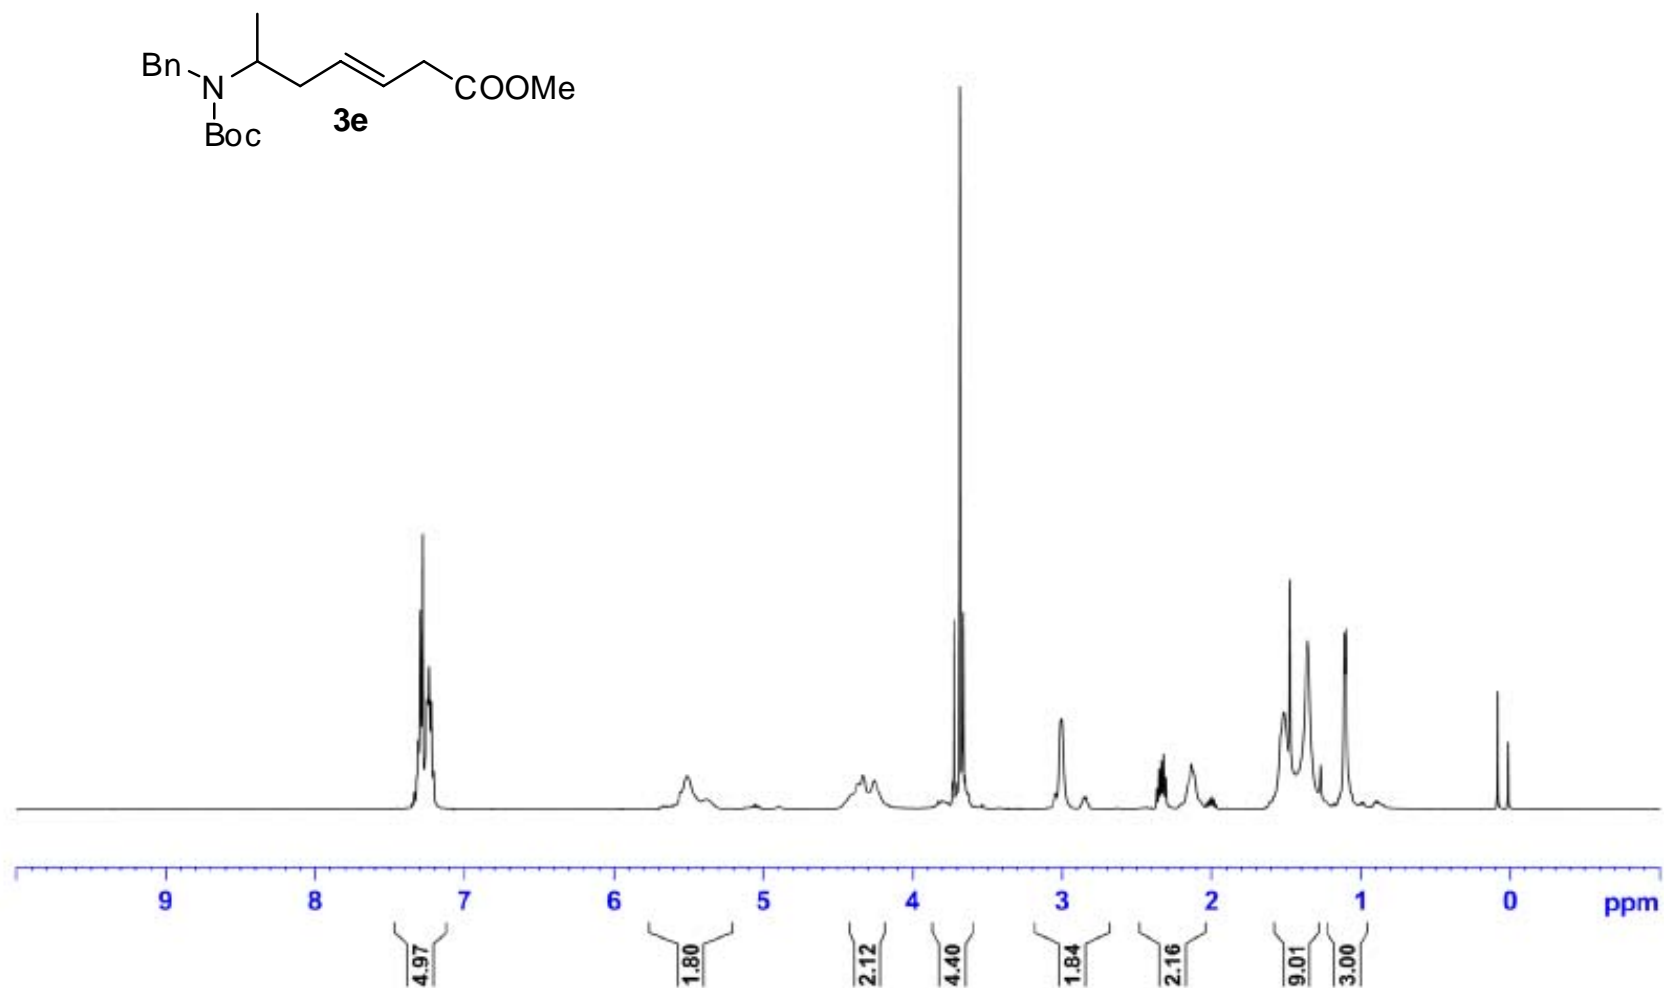

DMSO-d6, 343K

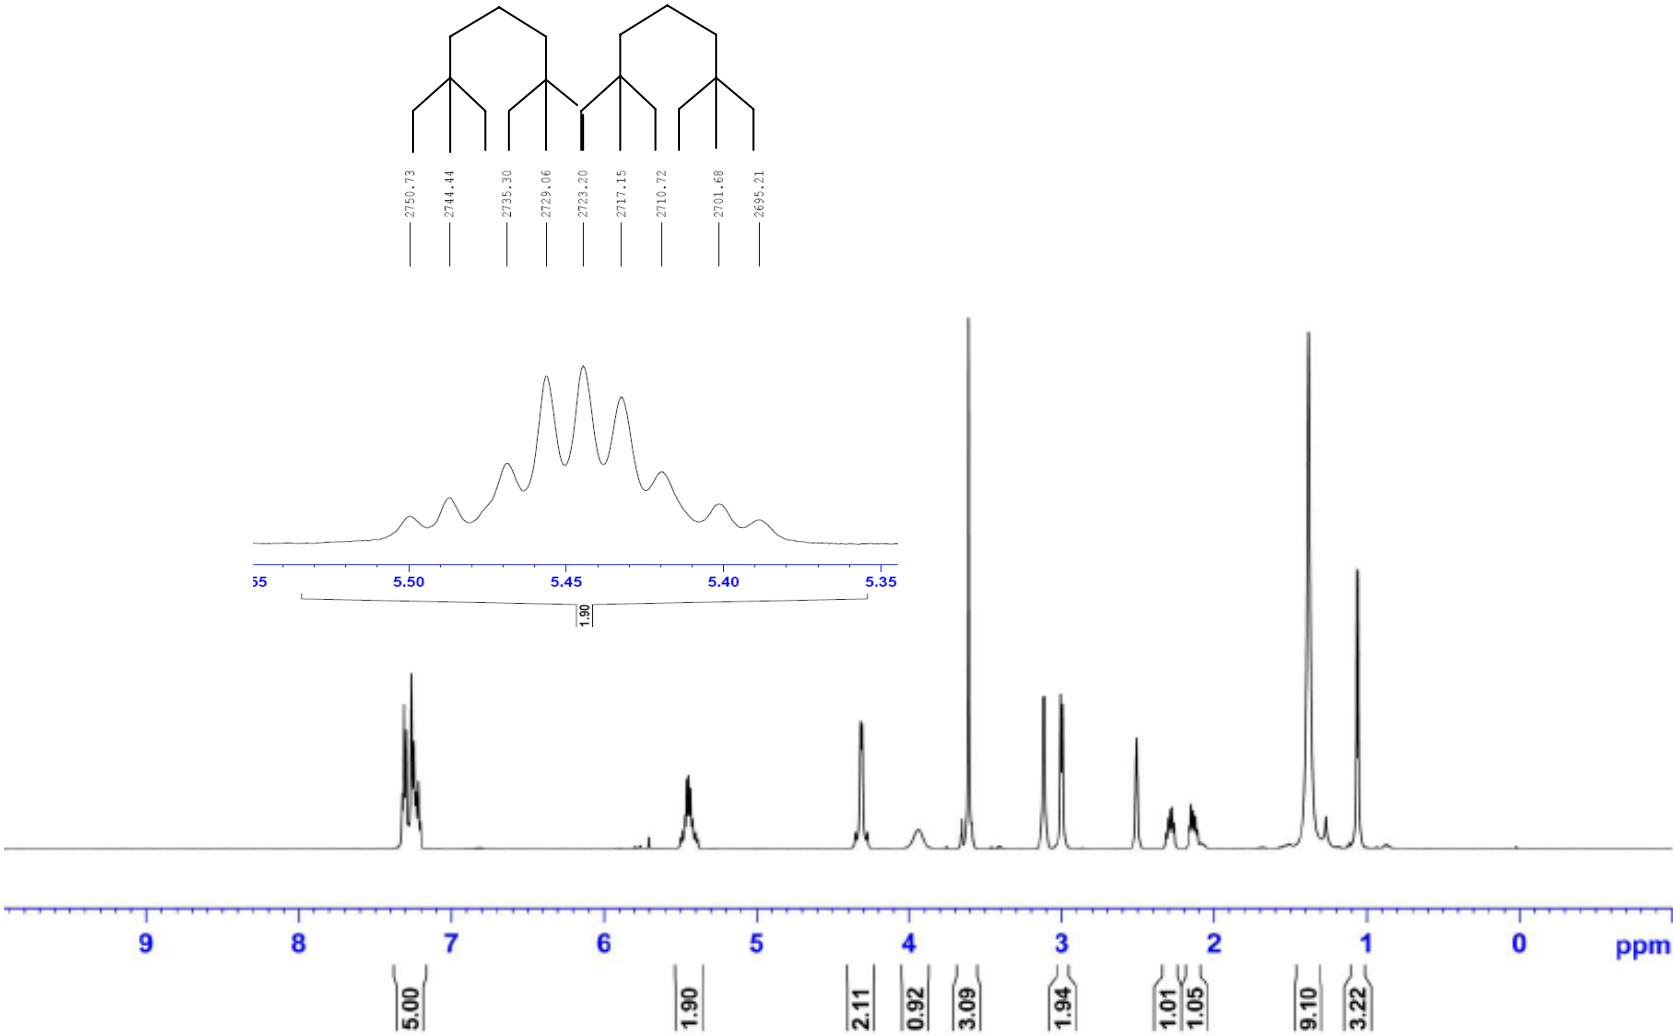

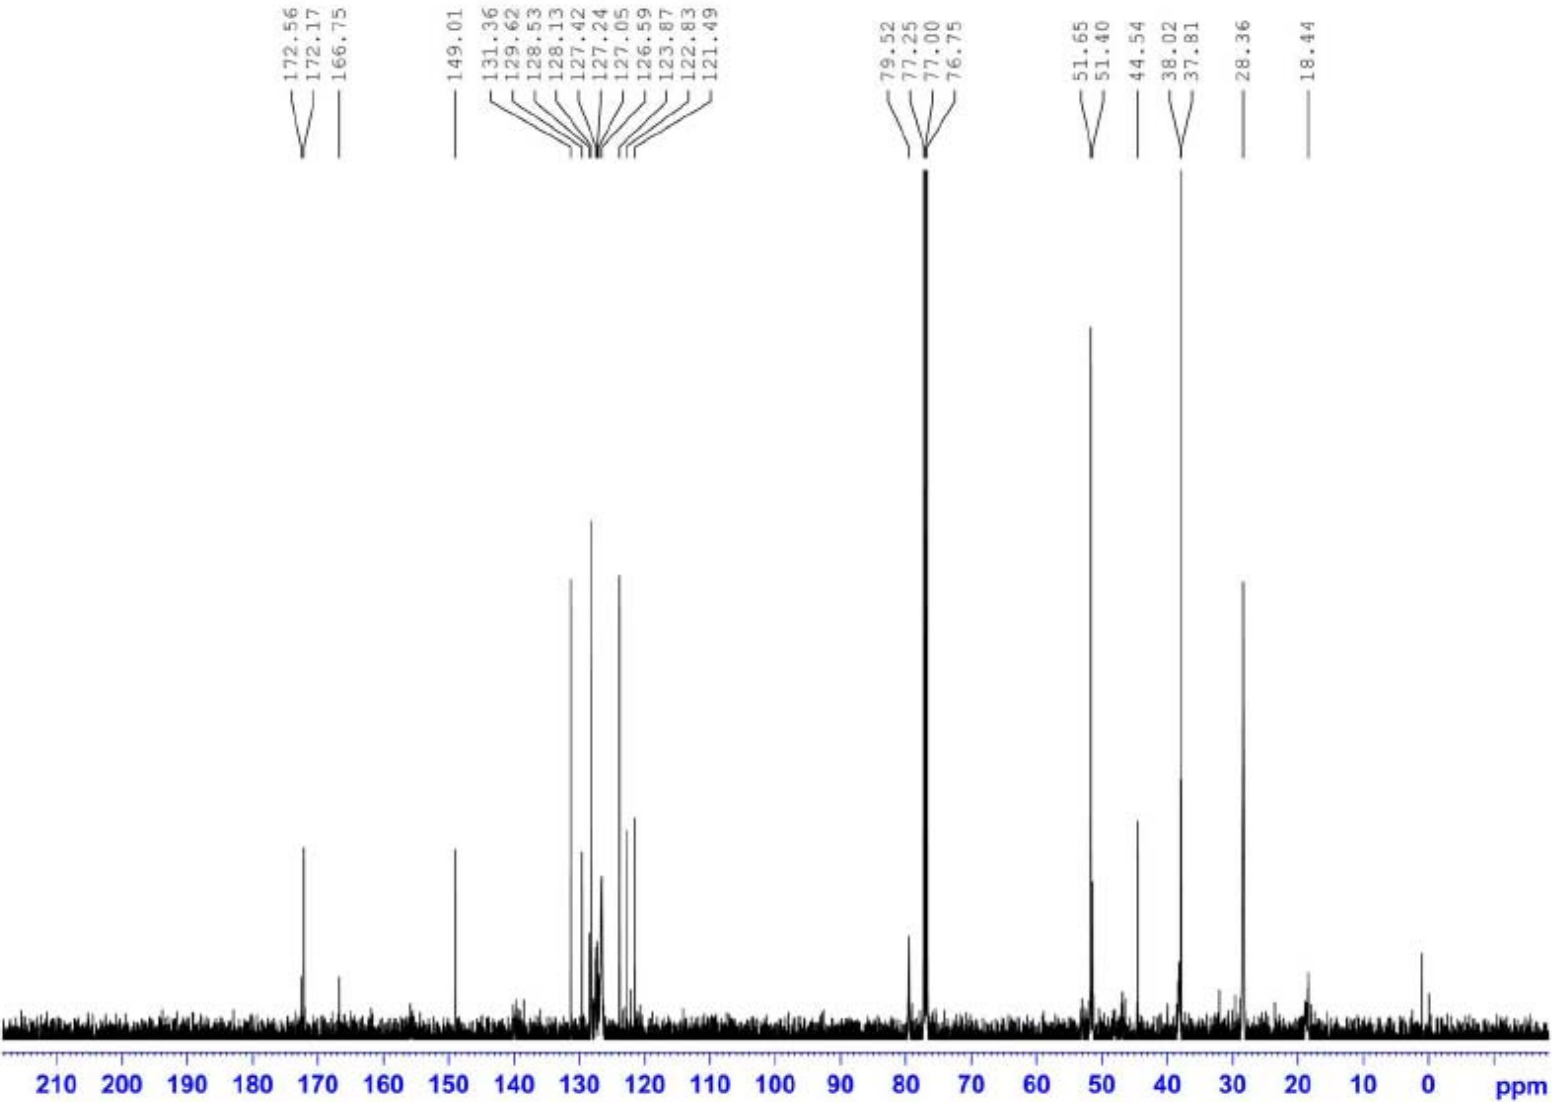

$^1\text{H}$  NMR and  $^{13}\text{C}$  NMR data of compound **9**:

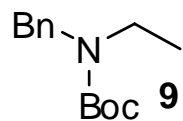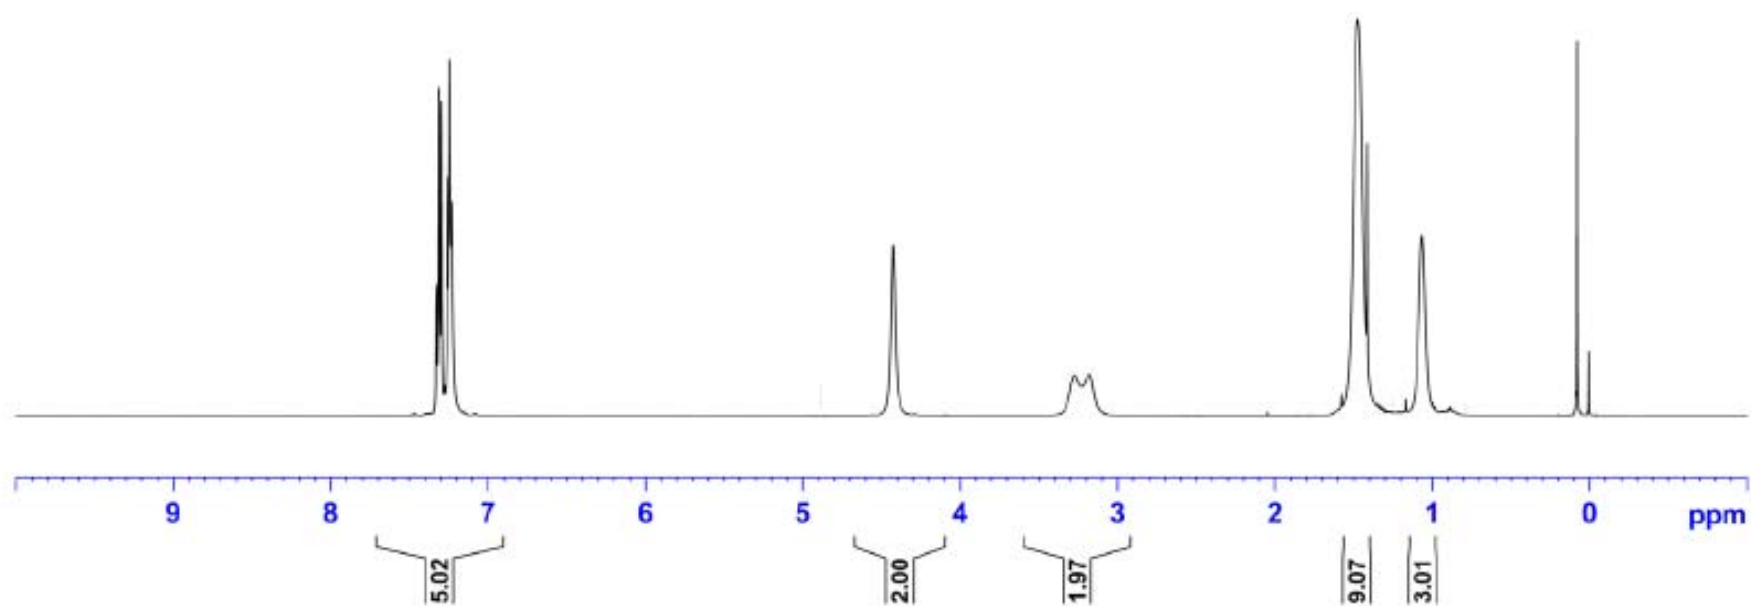

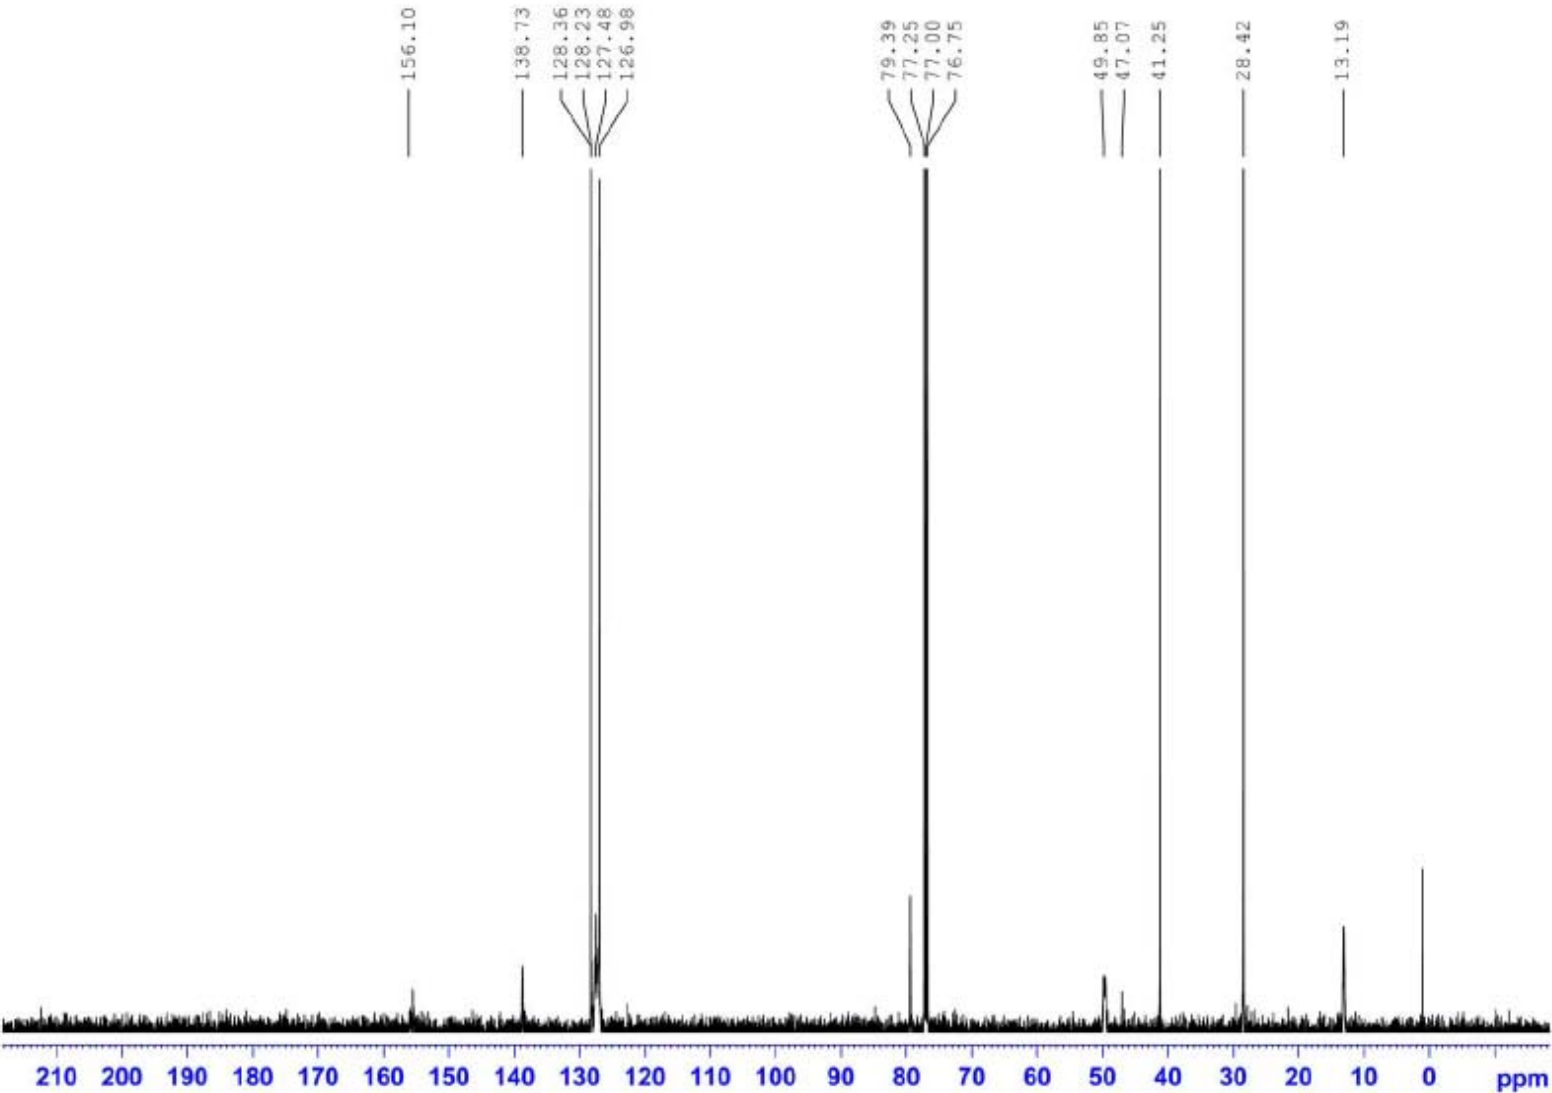

$^1\text{H}$  NMR and  $^{13}\text{C}$  NMR data of compound **11a**:

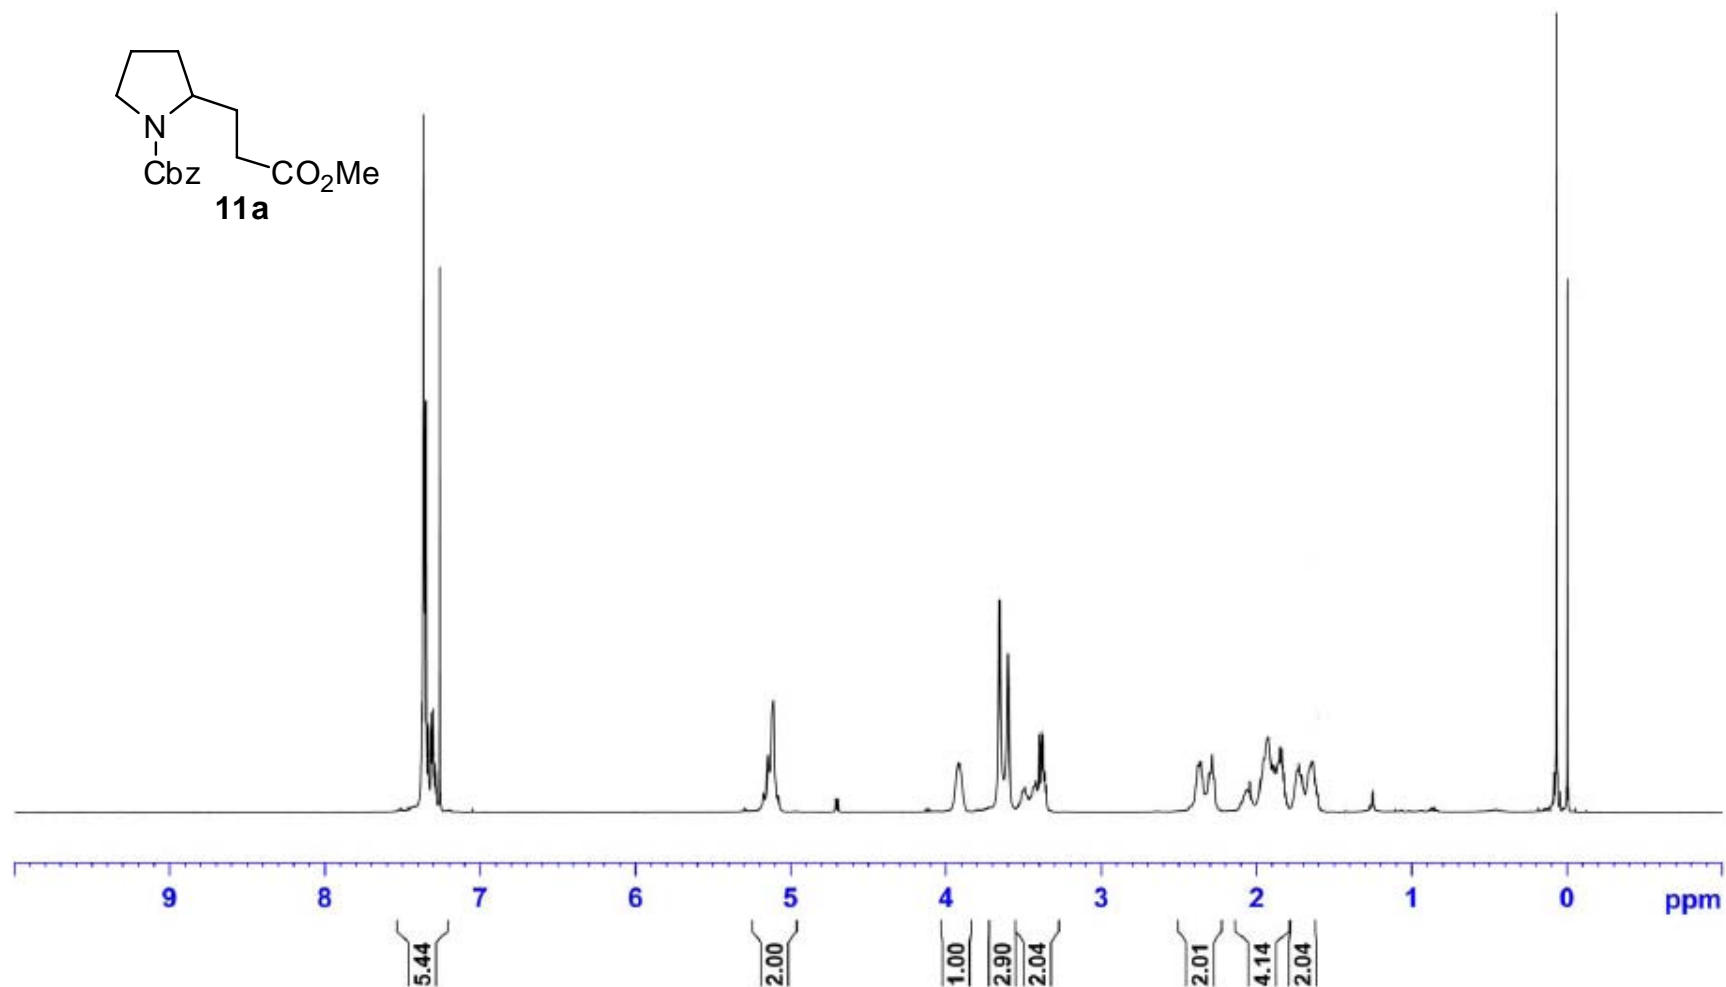

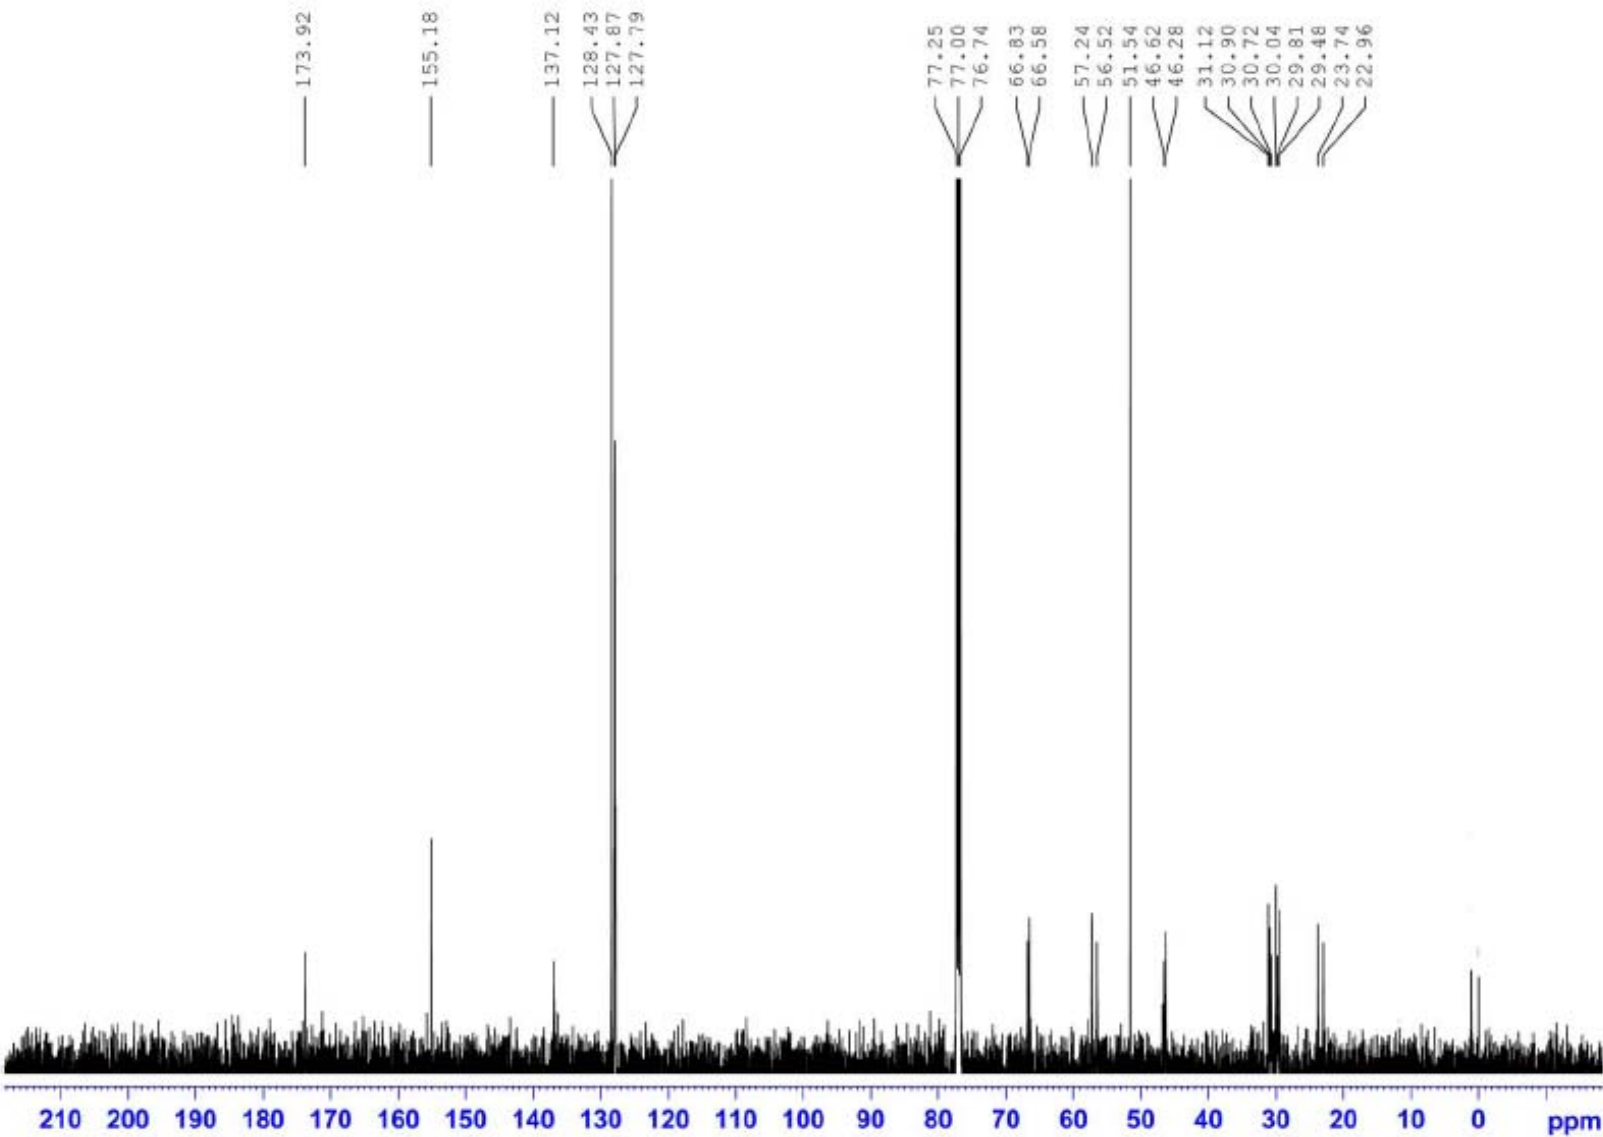



$^1\text{H}$  NMR and  $^{13}\text{C}$  NMR data of compound **11b**:

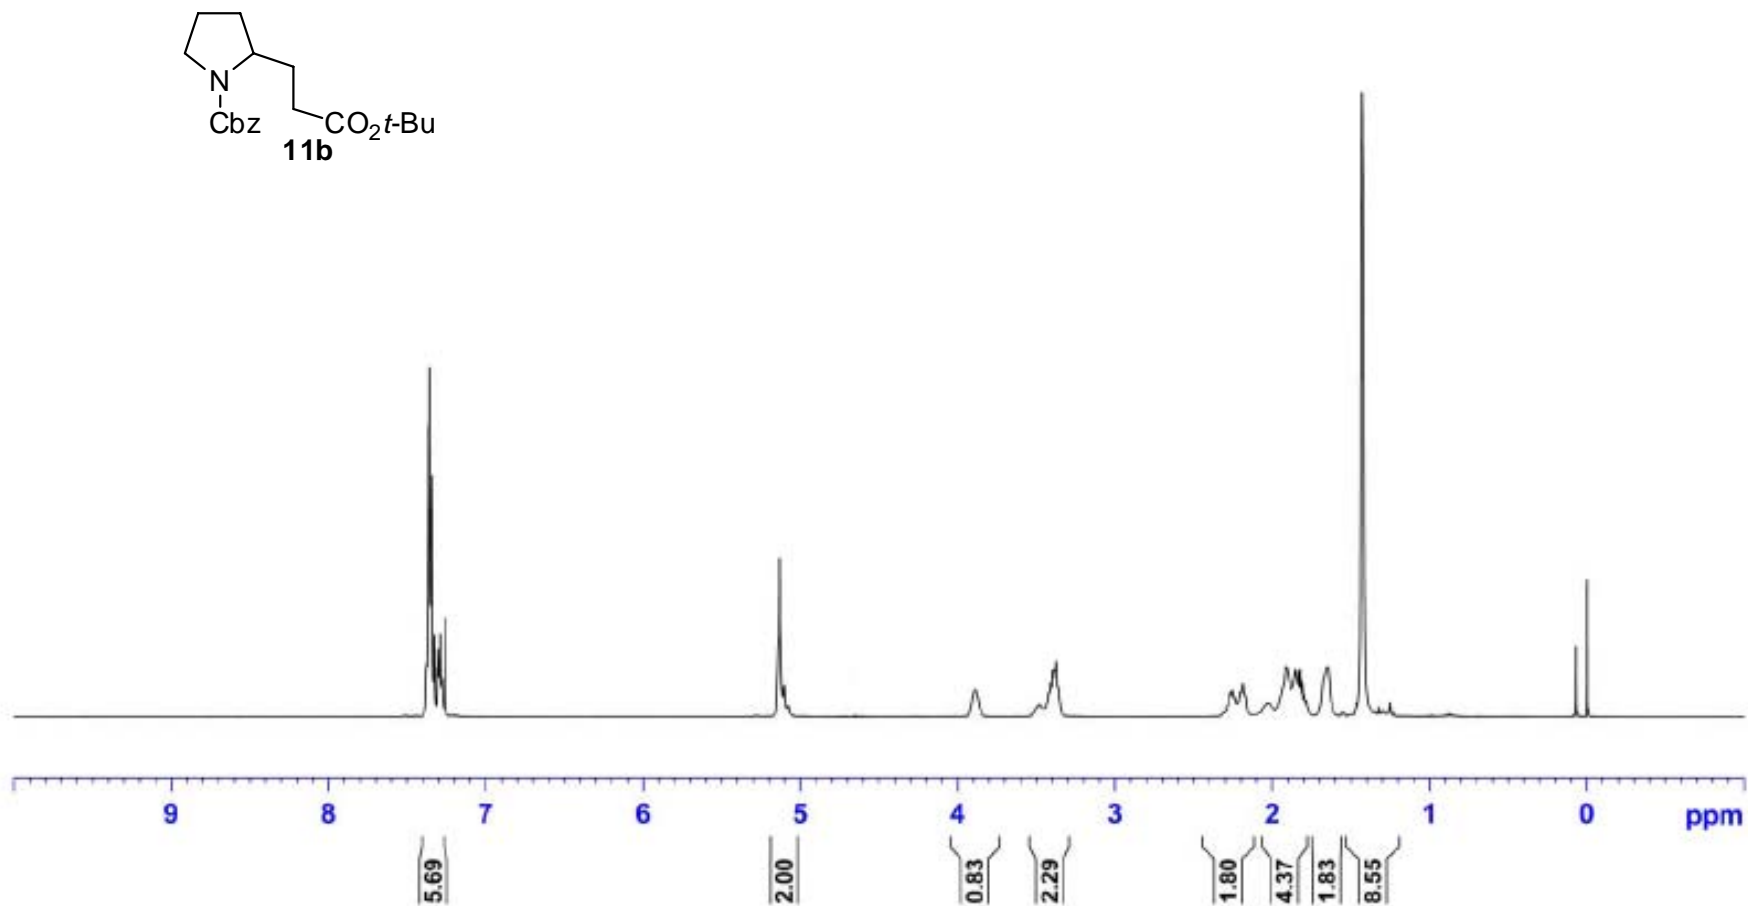

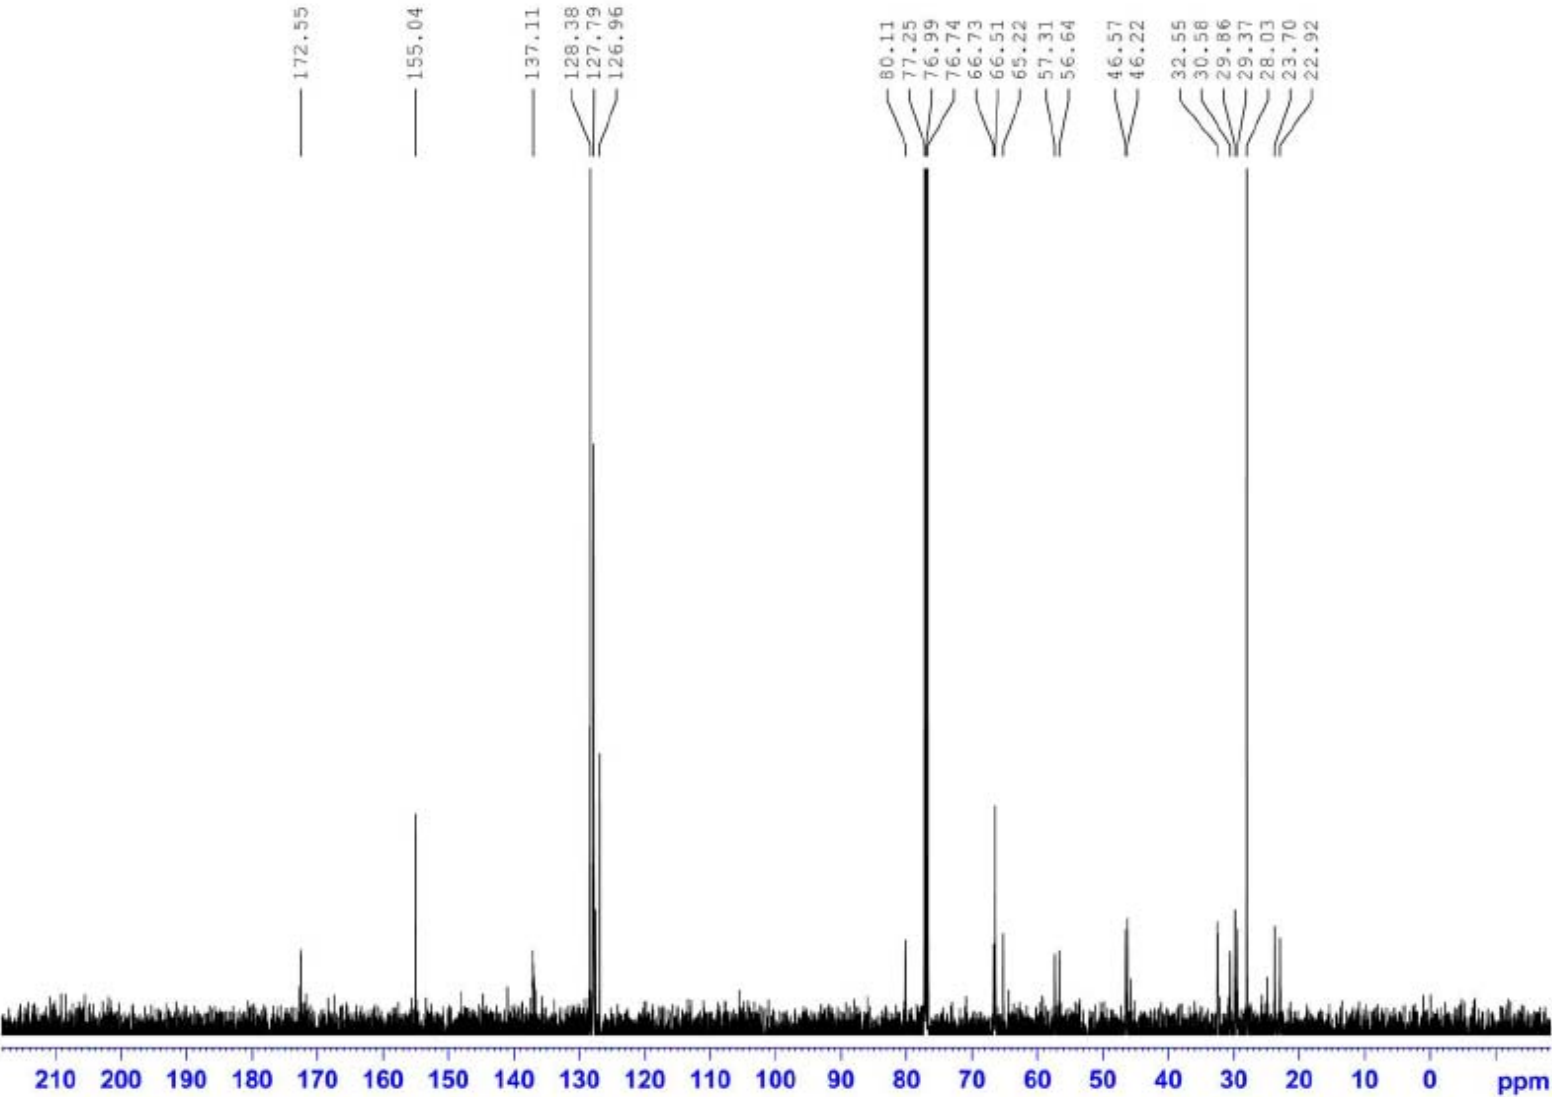

$^1\text{H}$  NMR and  $^{13}\text{C}$  NMR data of compound **11c**:

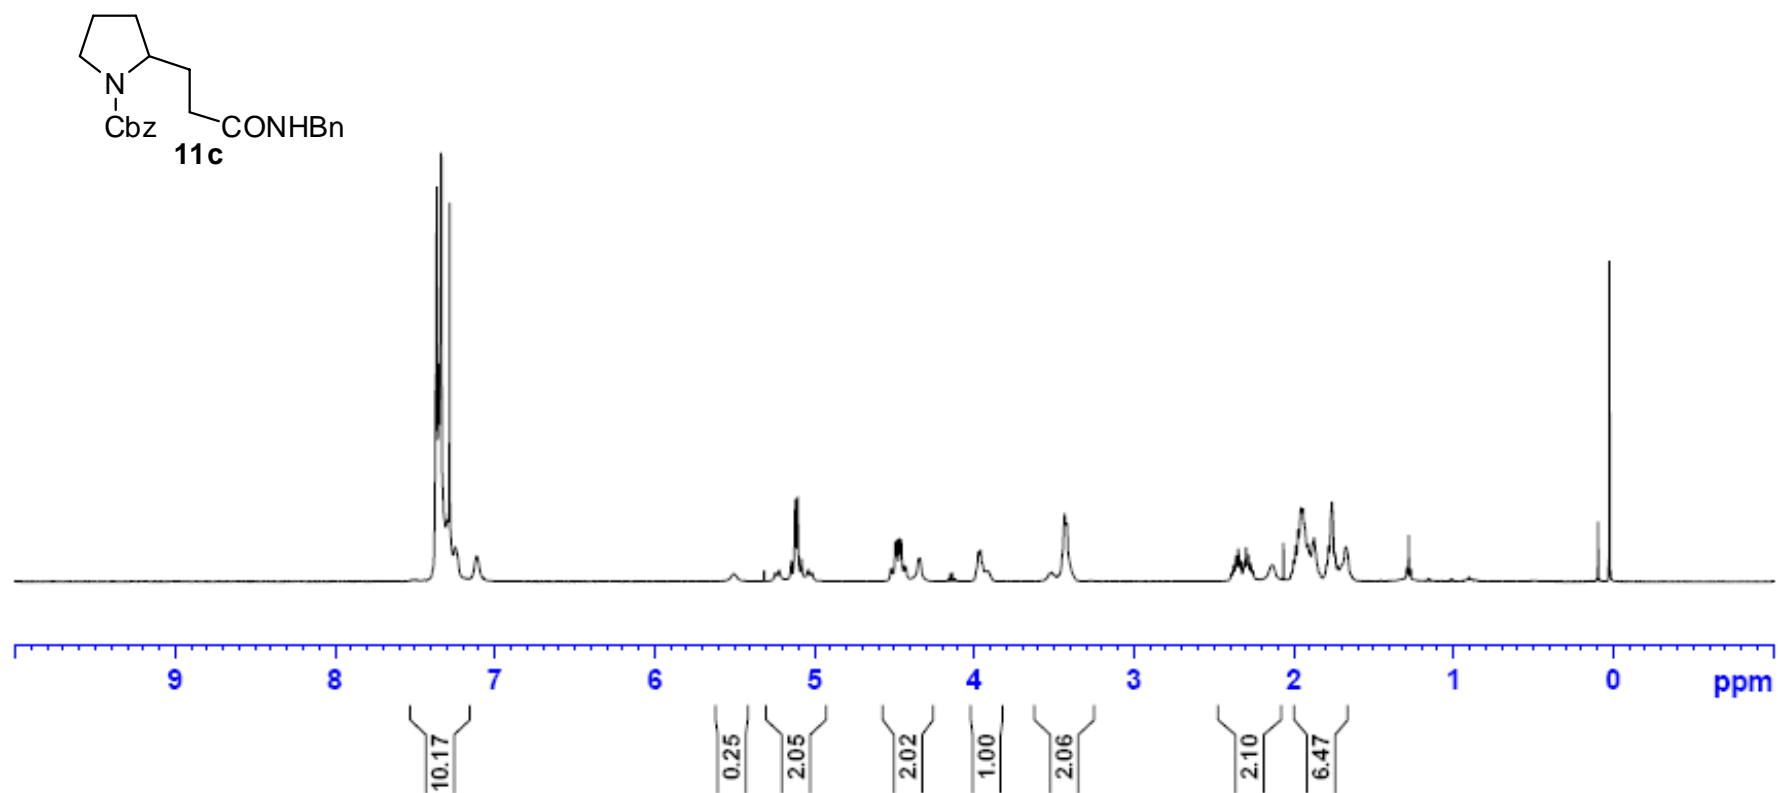

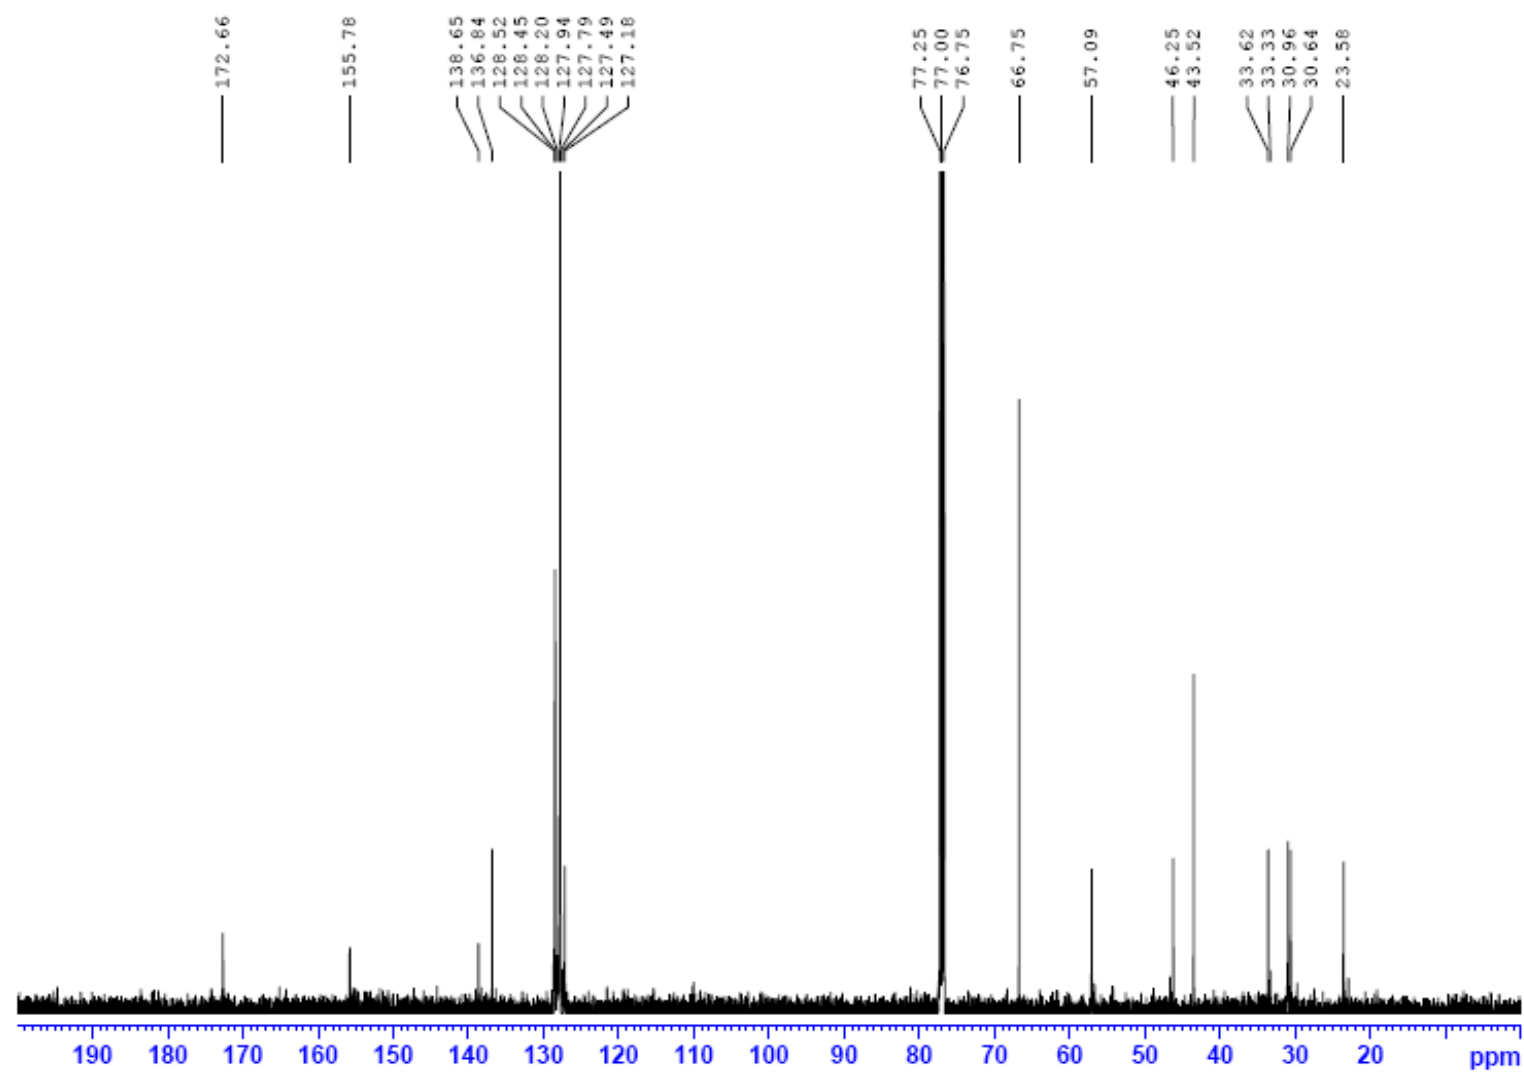

$^1\text{H}$  NMR and  $^{13}\text{C}$  NMR data of compound **11d**:

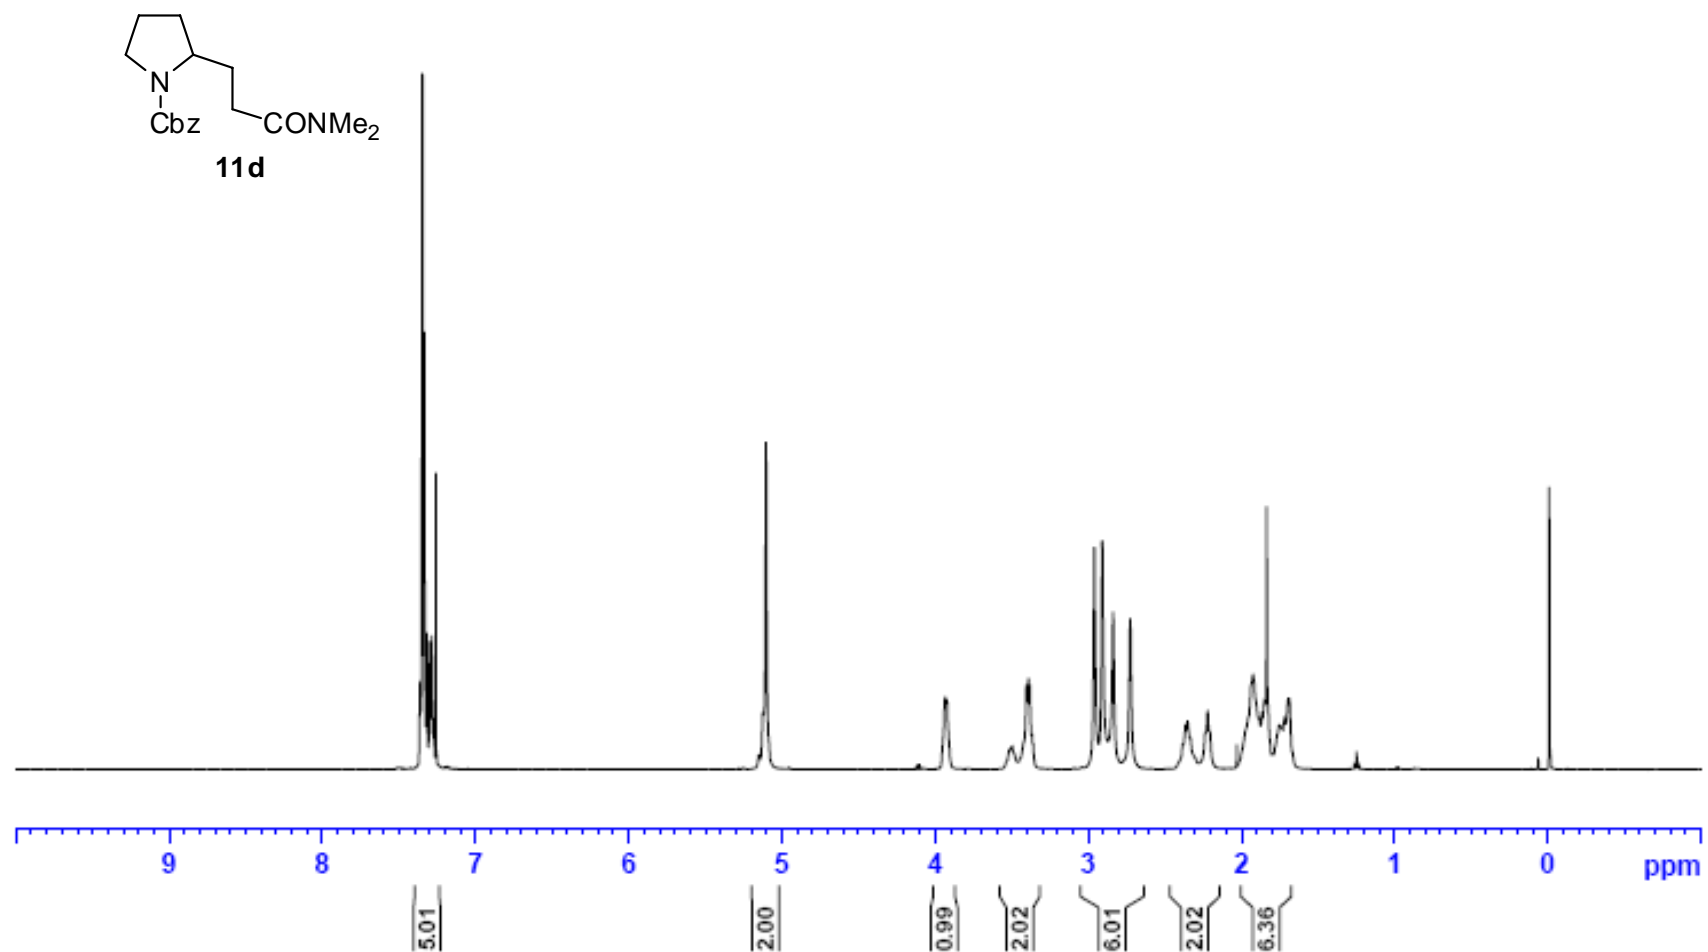

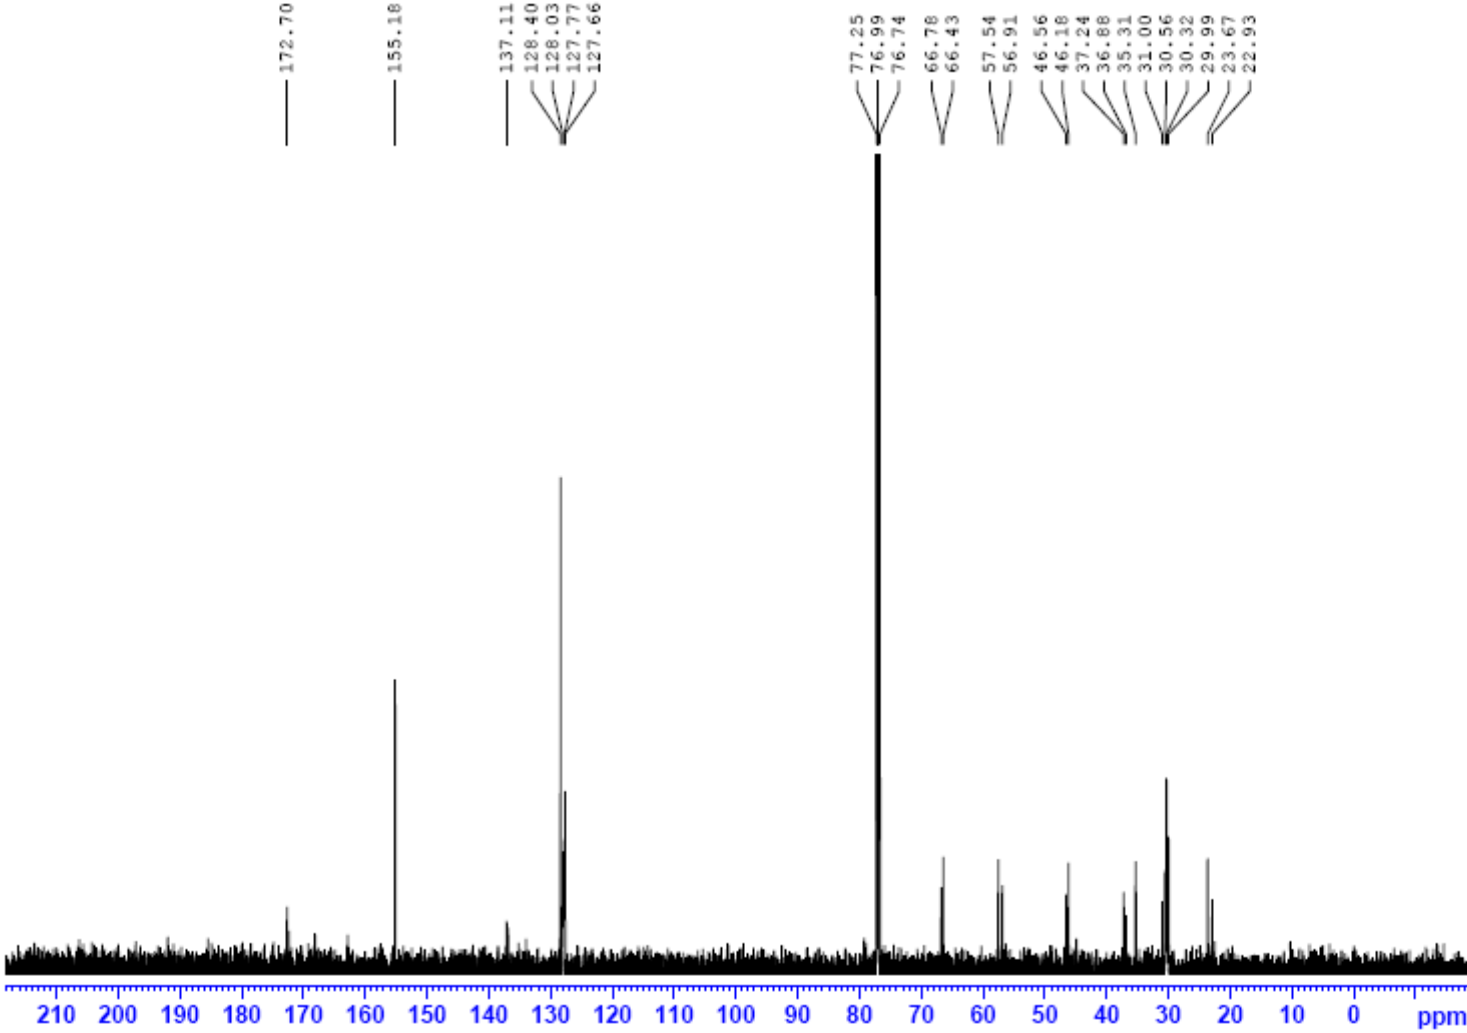

$^1\text{H}$  NMR and  $^{13}\text{C}$  NMR data of compound **Z-11e**:

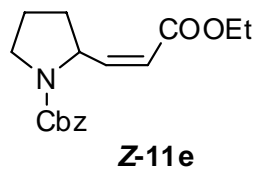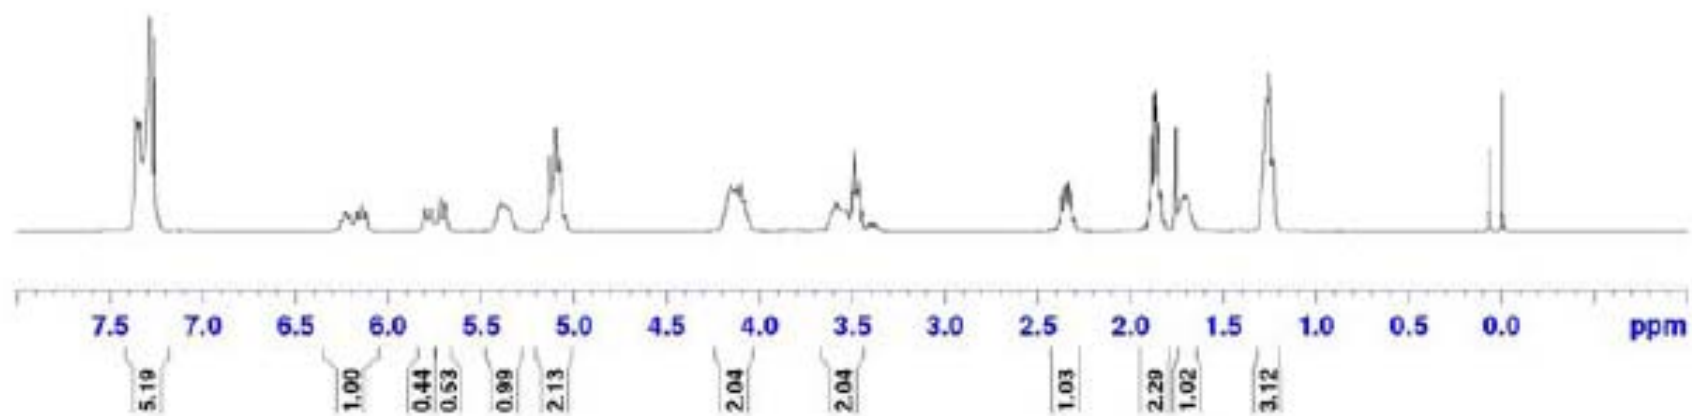

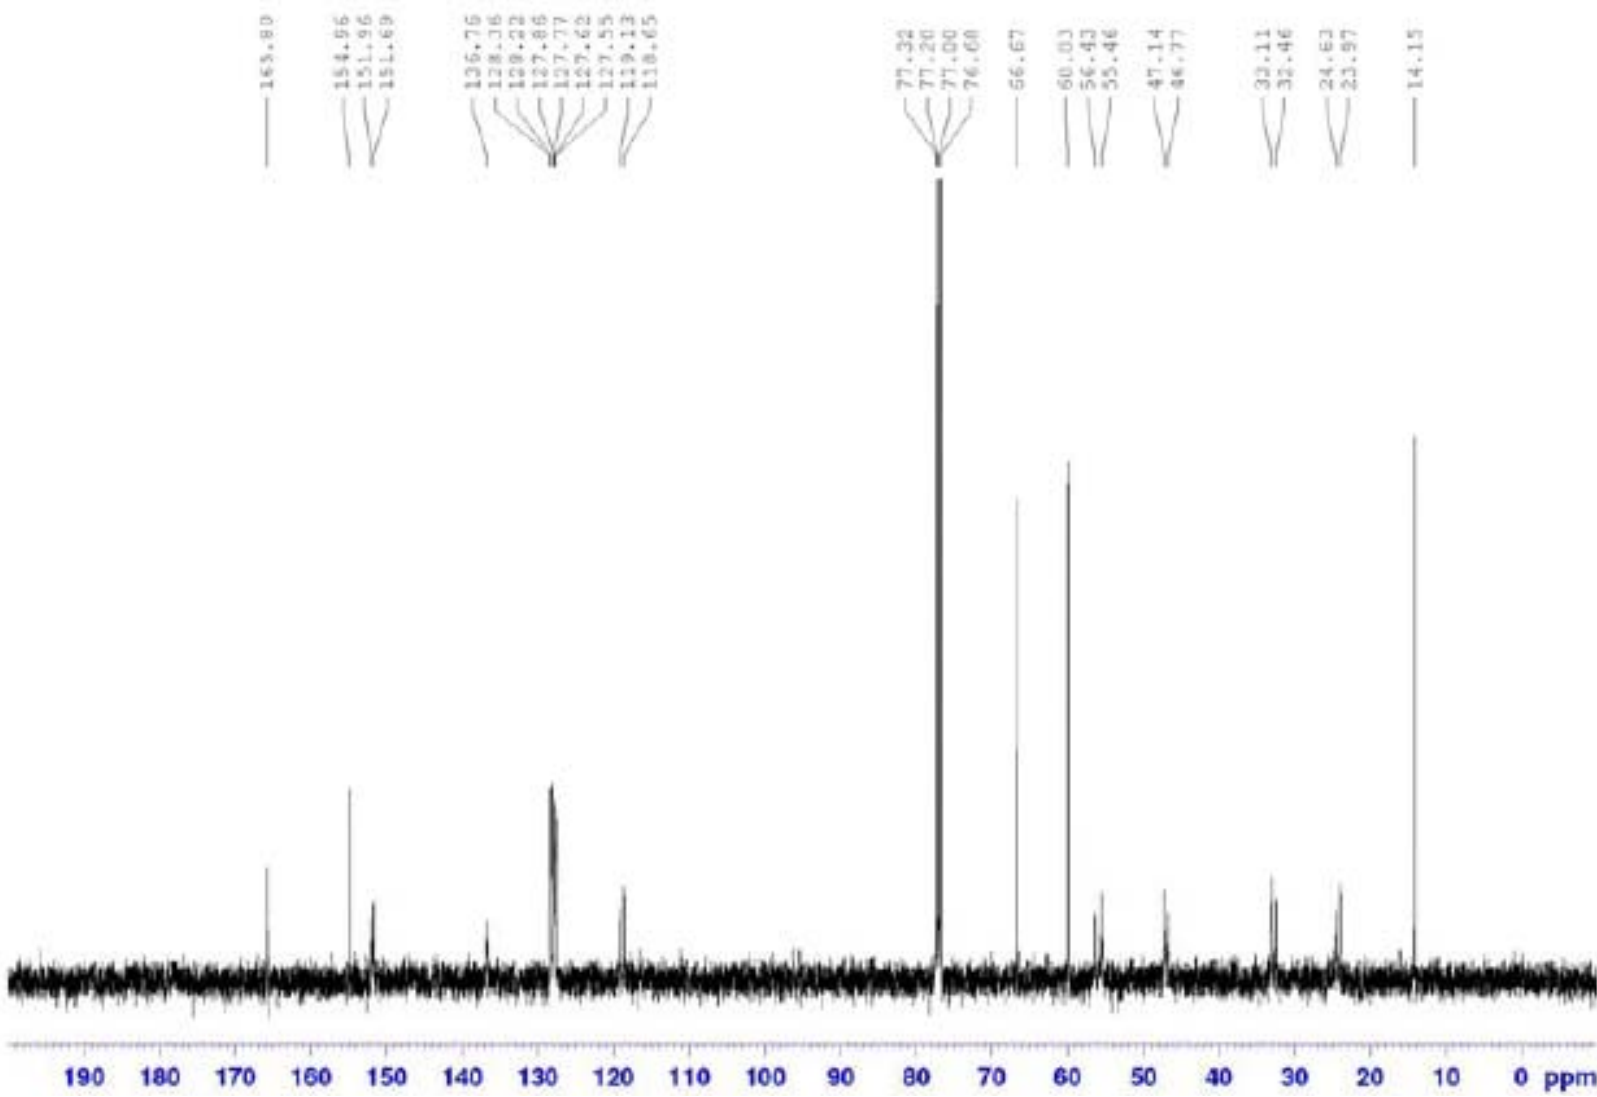



$^1\text{H}$  NMR and  $^{13}\text{C}$  NMR data of compound **E-11e**:

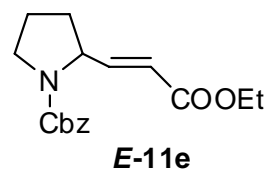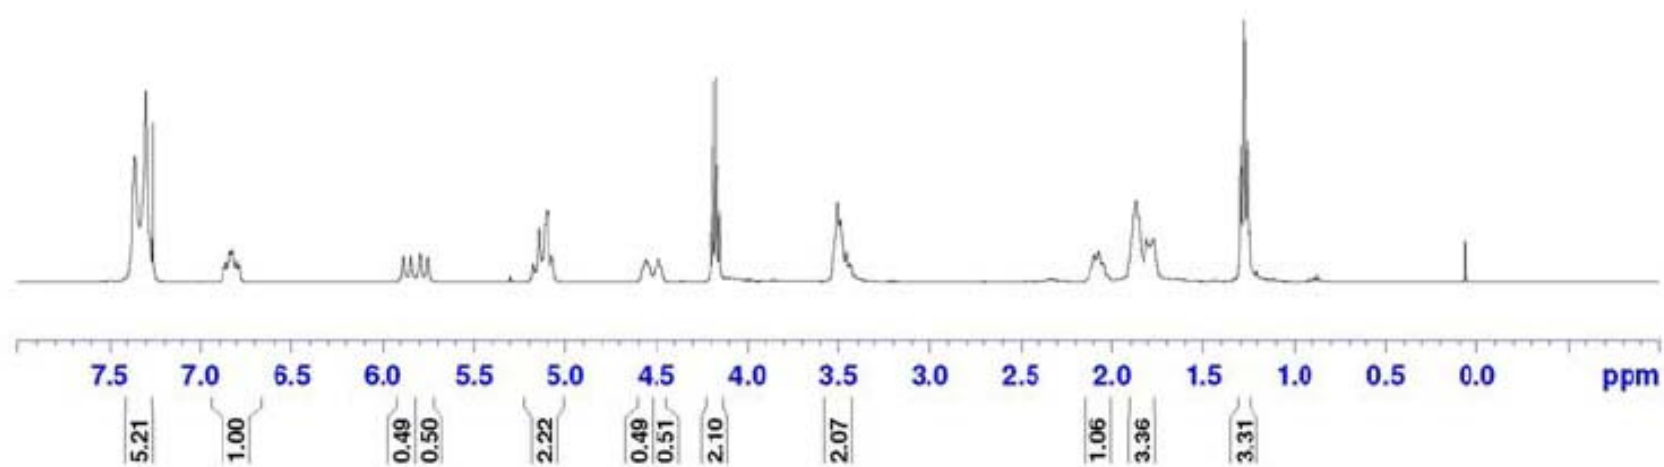

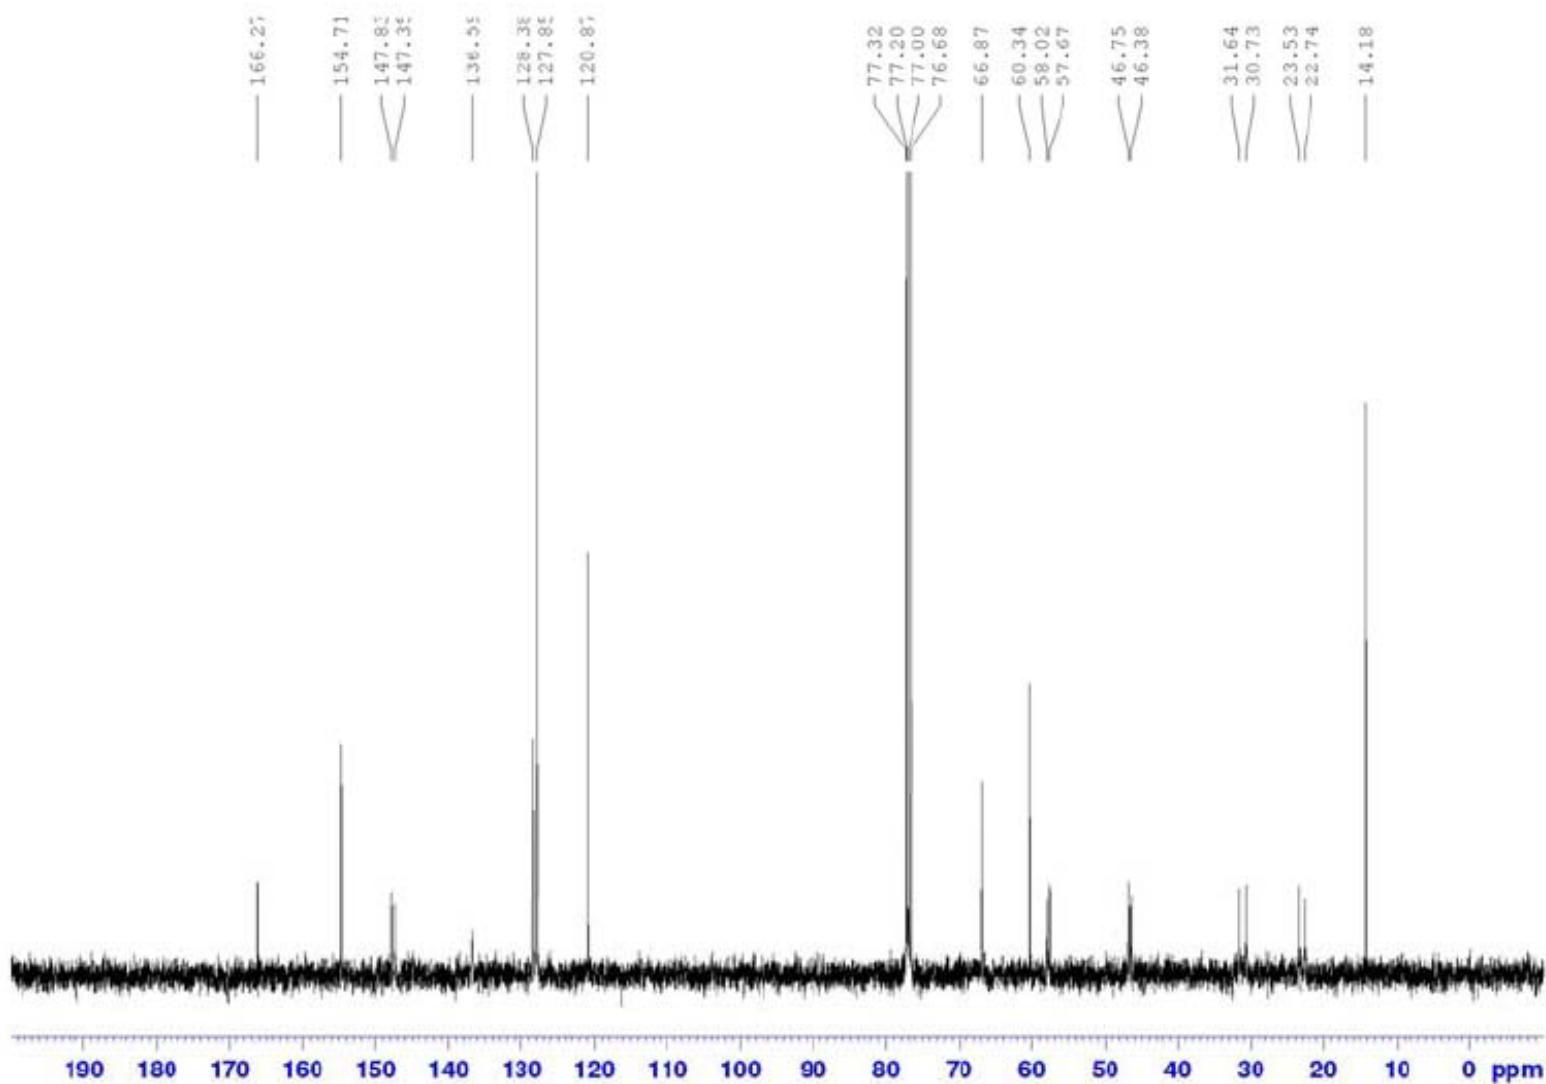

$^1\text{H}$  NMR and  $^{13}\text{C}$  NMR data of compound **11f**:

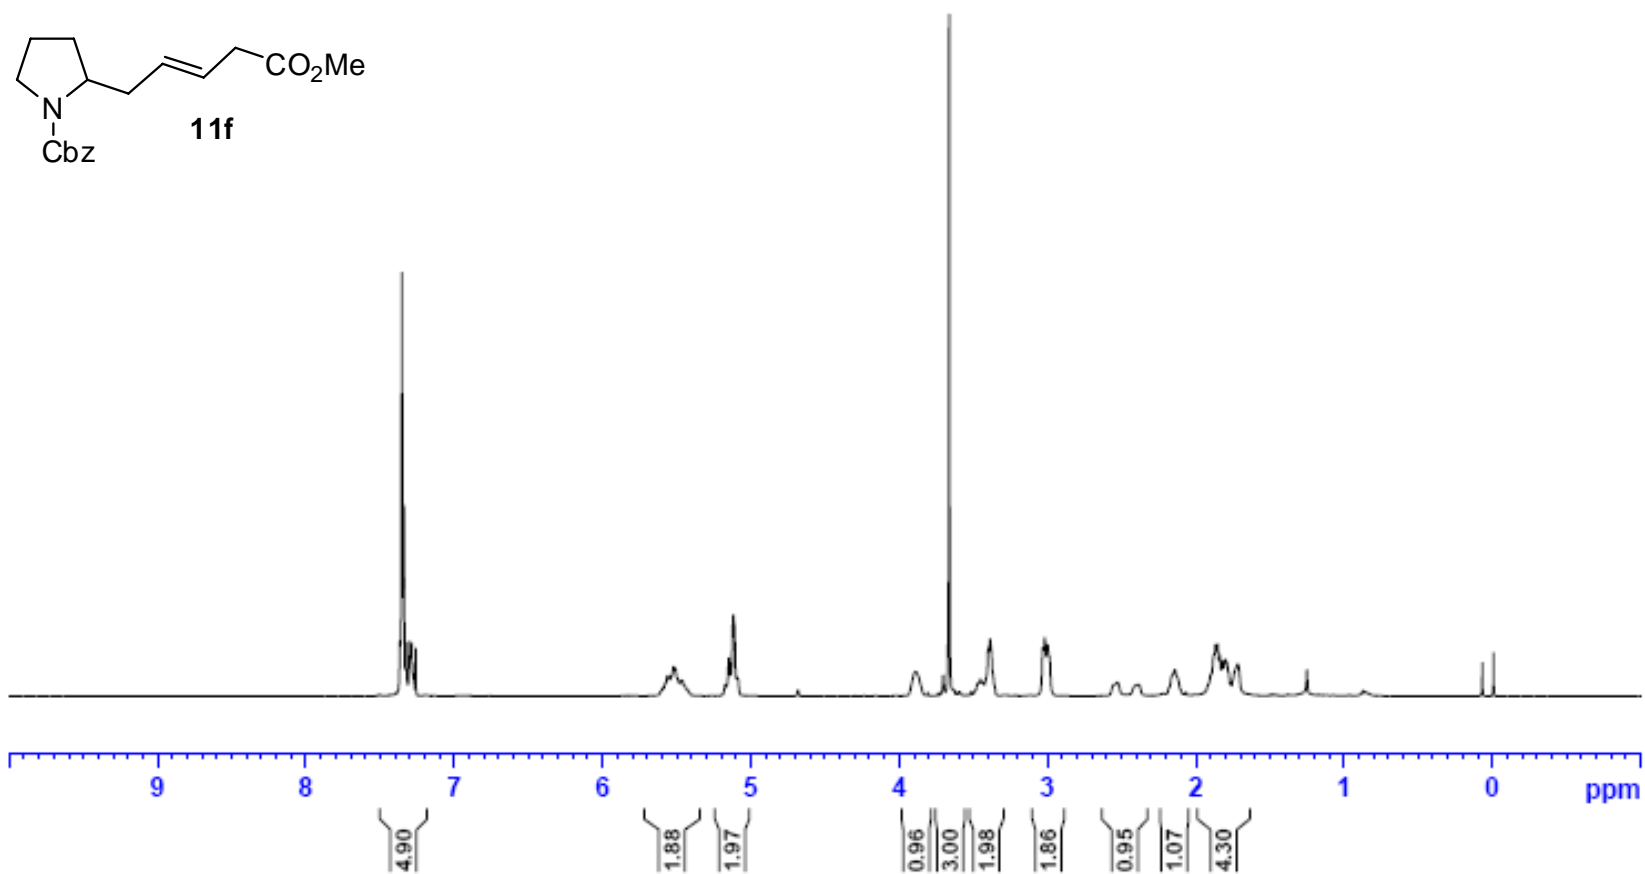

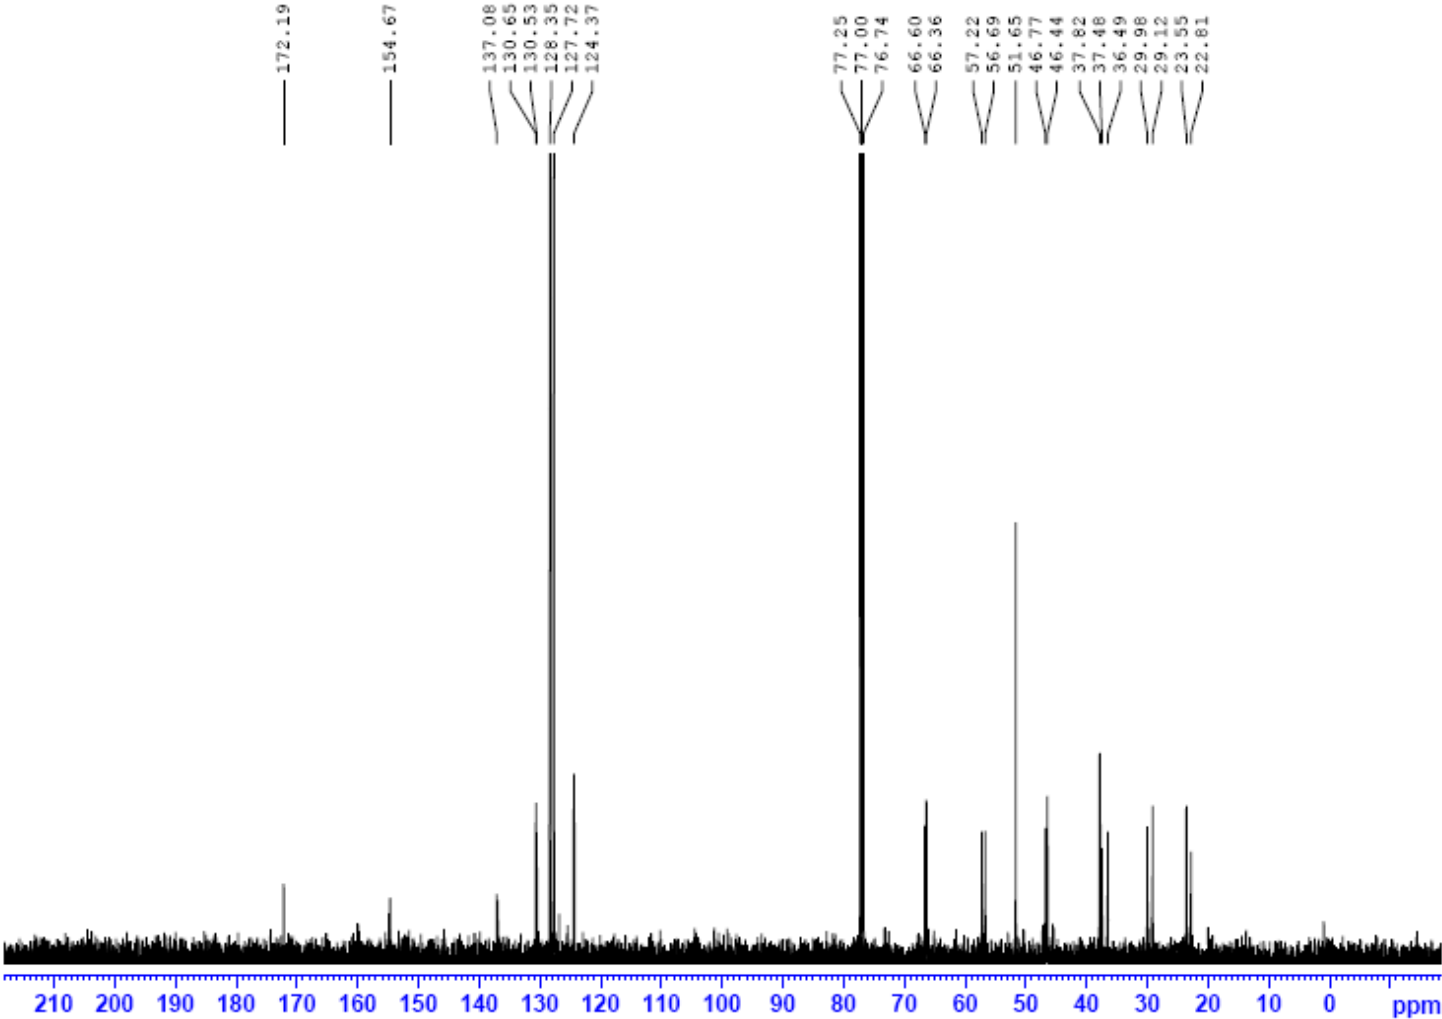

$^1\text{H}$  NMR and  $^{13}\text{C}$  NMR data of compound **14a**:

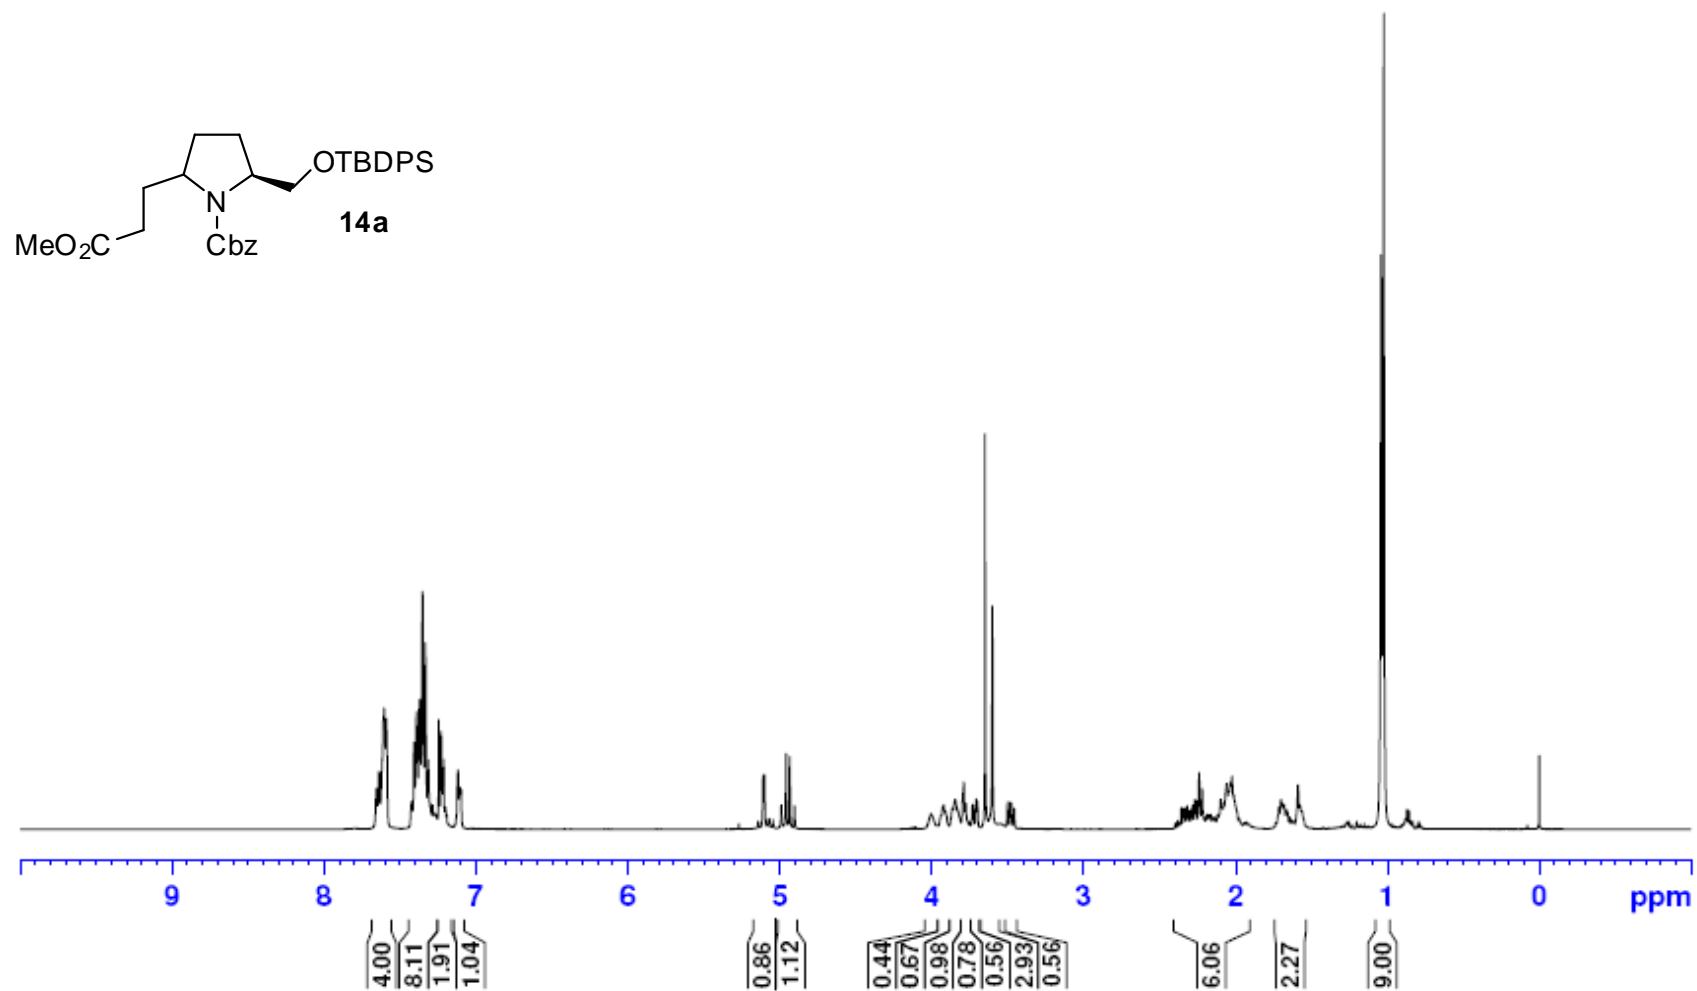

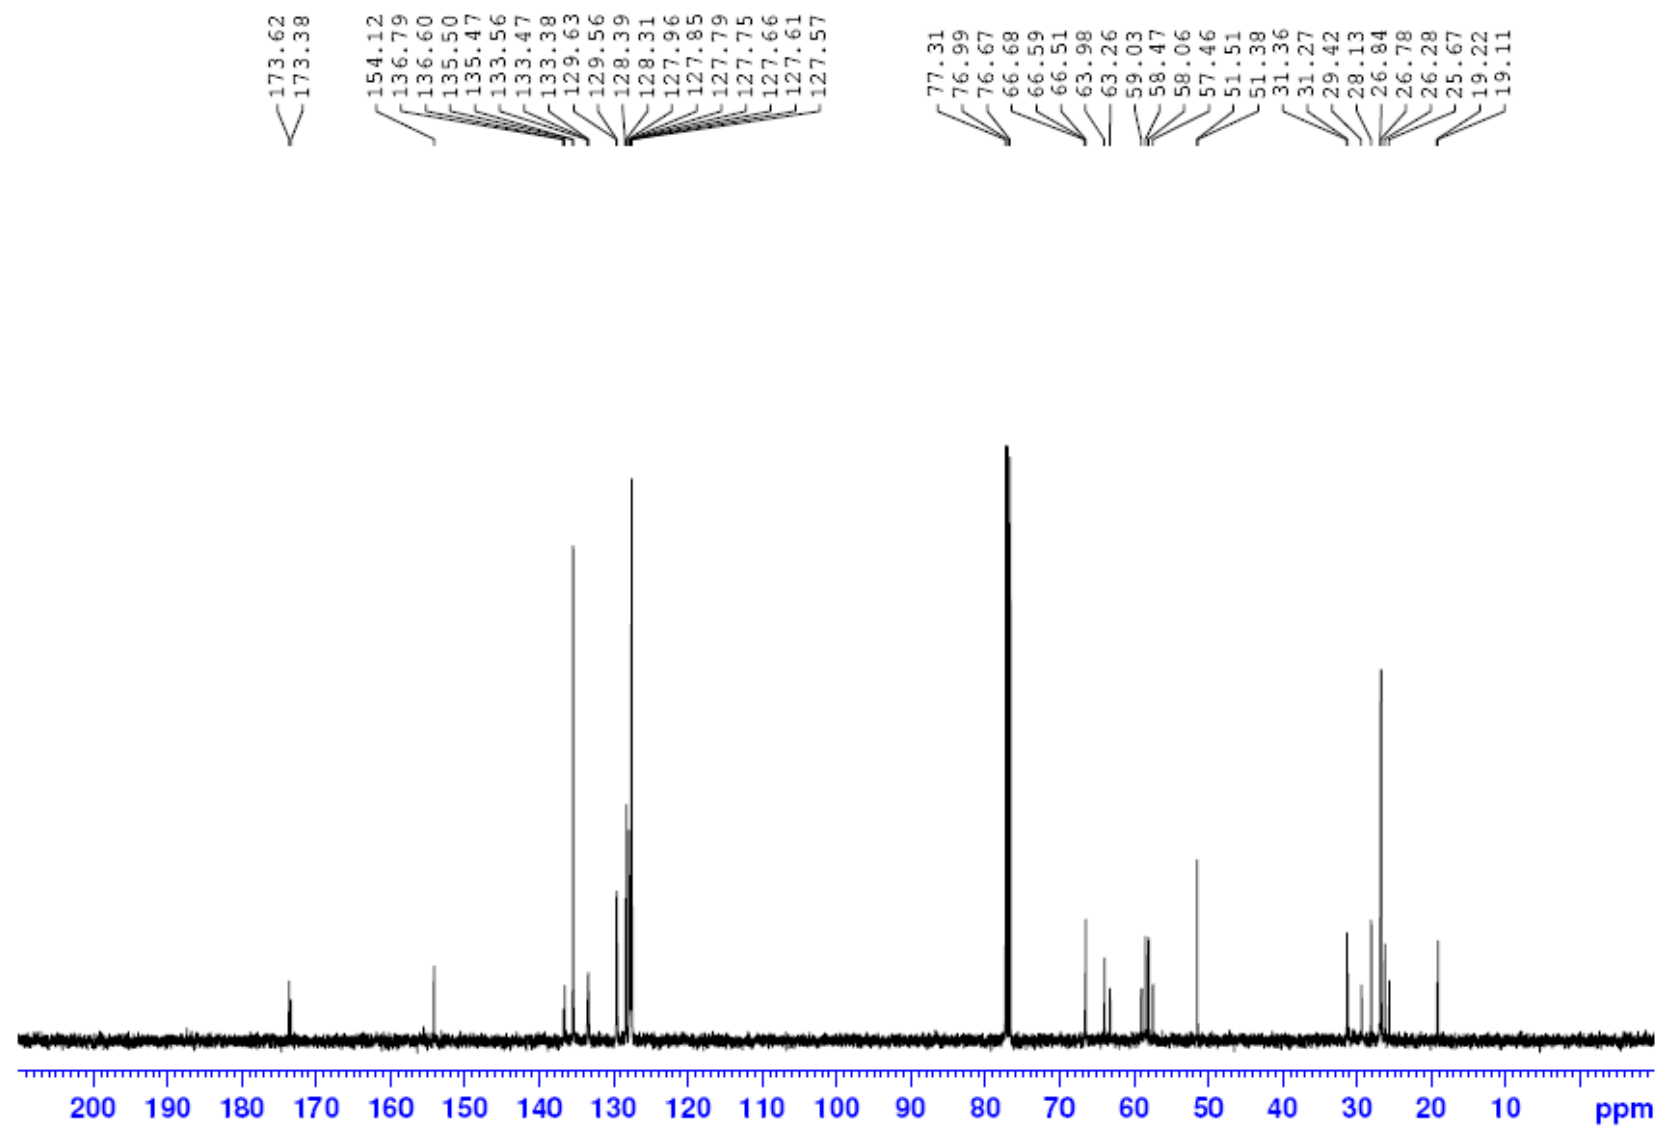

$^1\text{H}$  NMR and  $^{13}\text{C}$  NMR data of compound **14b**:

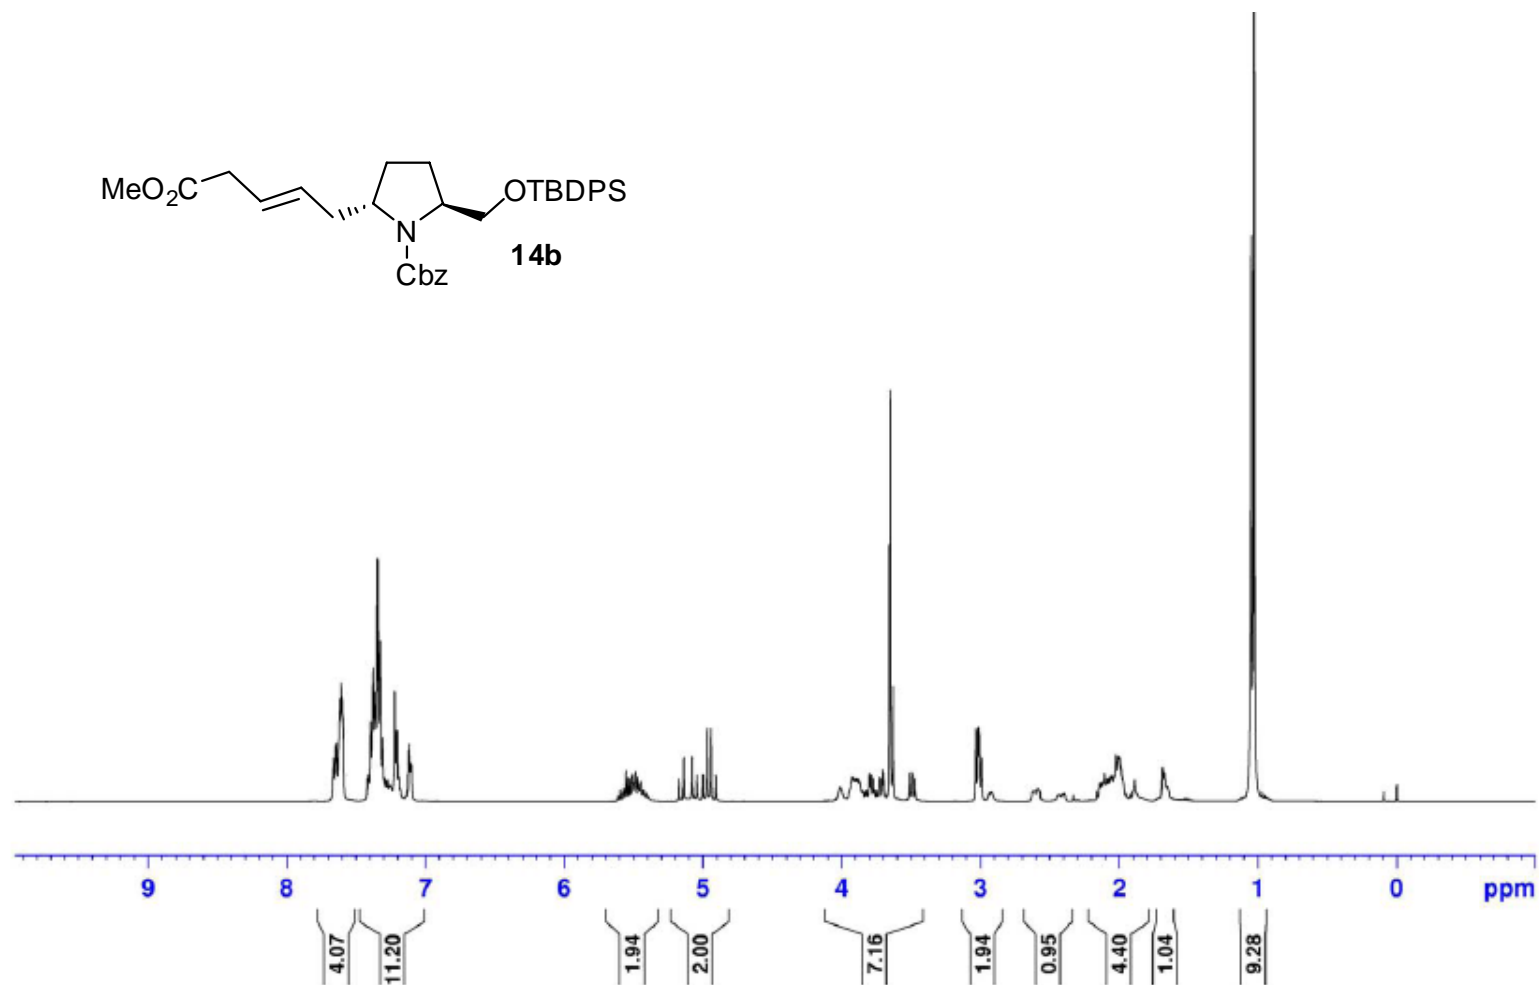

lxk-d-095-1-C13  
CDCl<sub>3</sub>  
2010-03-18

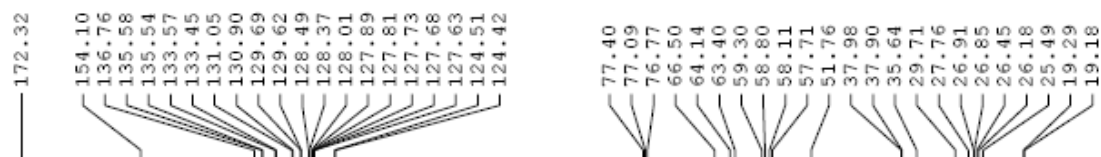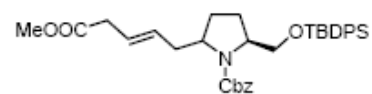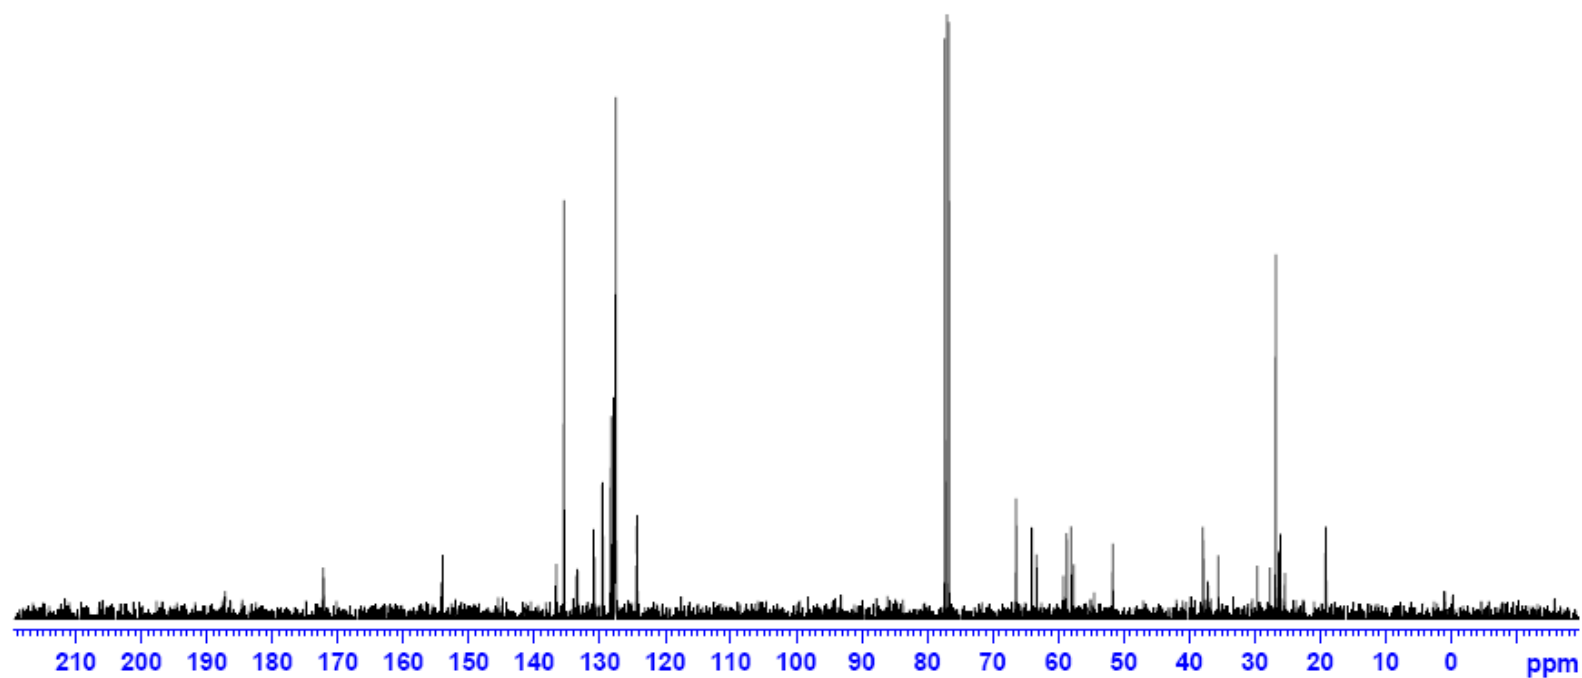



$^1\text{H}$  NMR and  $^{13}\text{C}$  NMR data of compound **15a**:

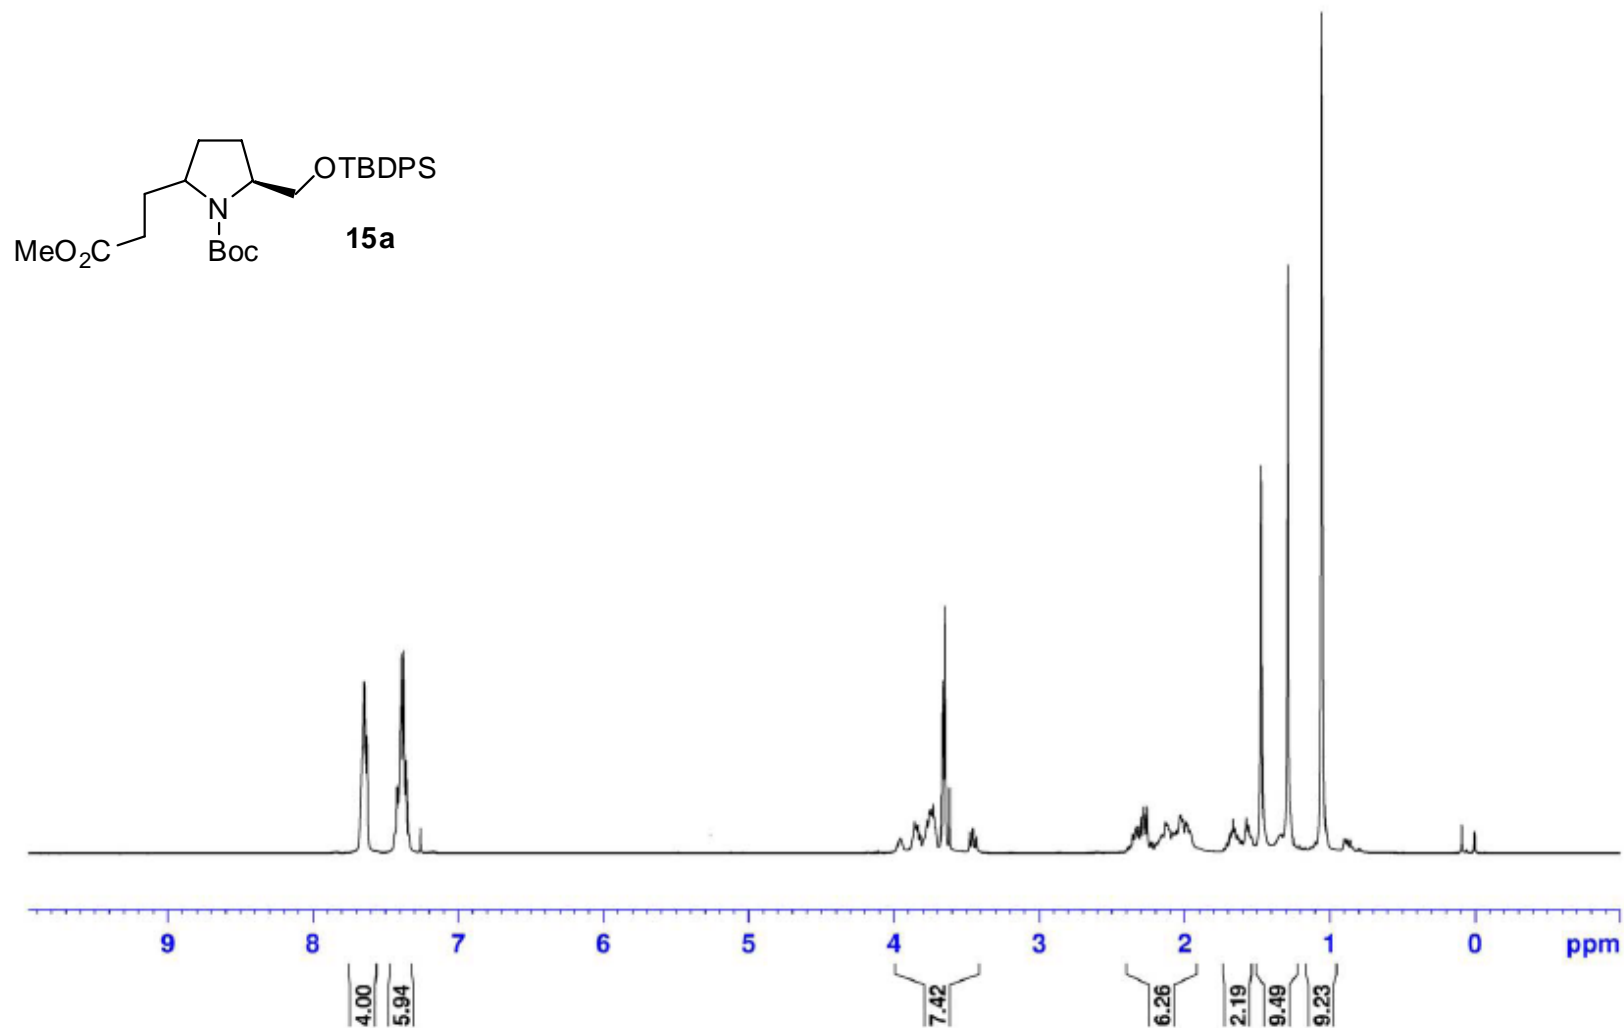

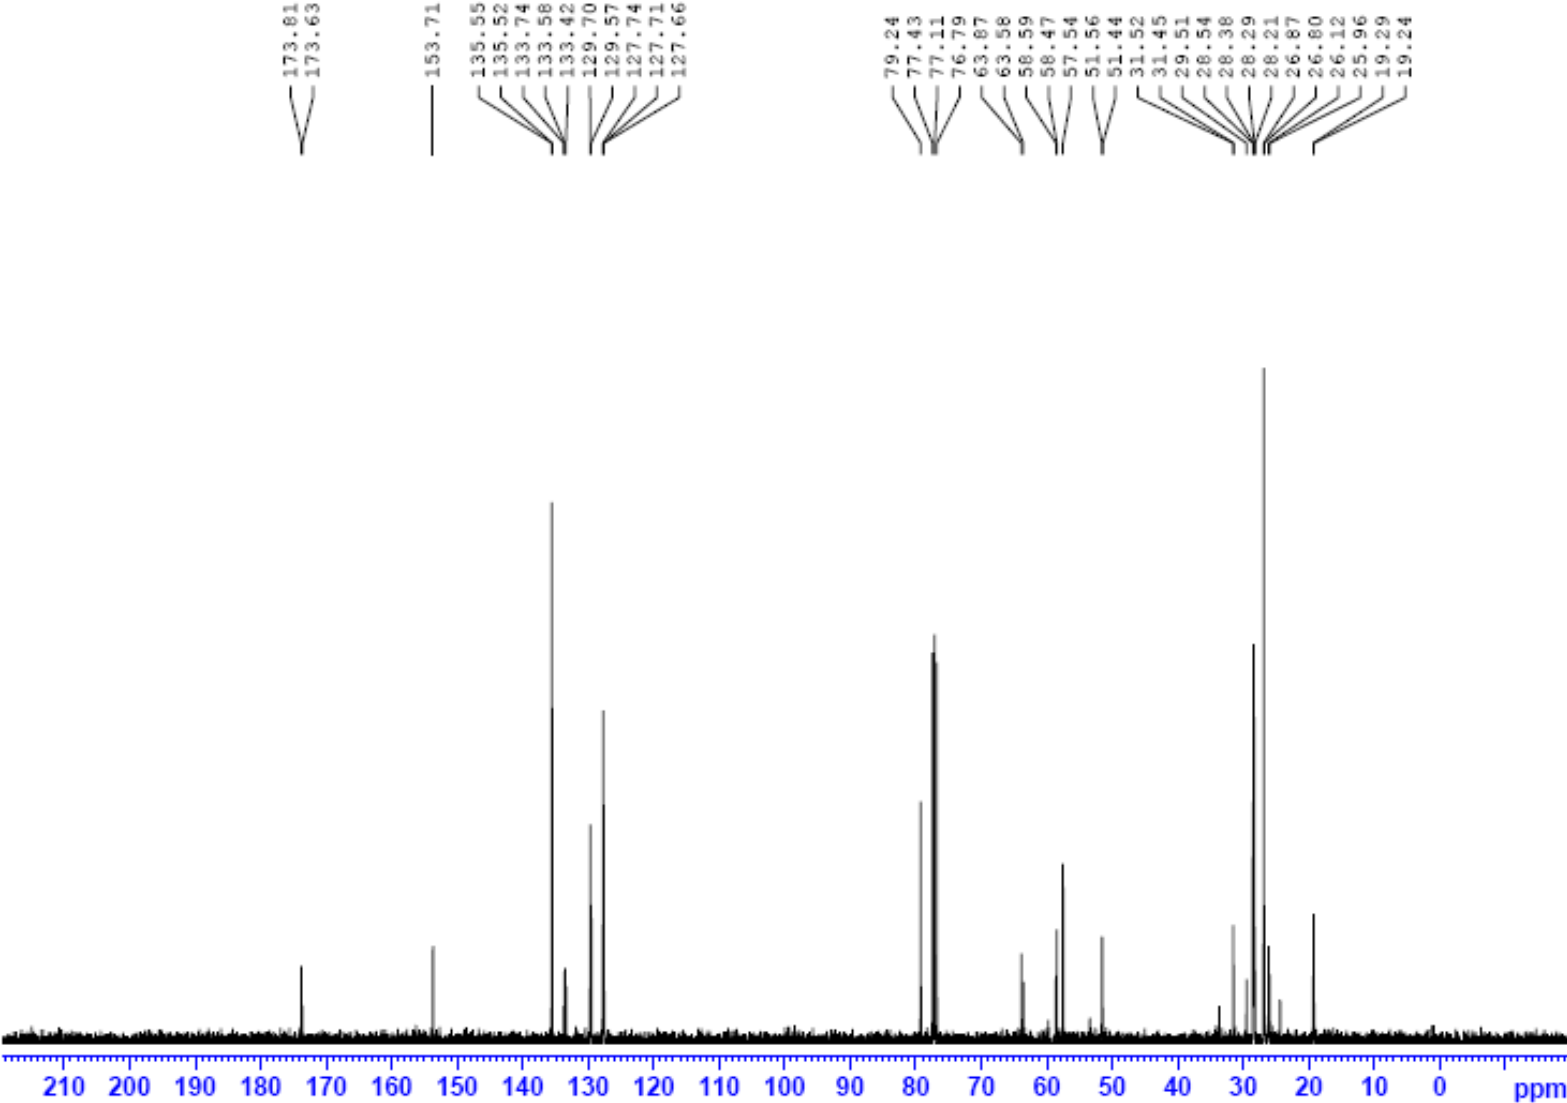

$^1\text{H}$  NMR and  $^{13}\text{C}$  NMR data of compound **15b**:

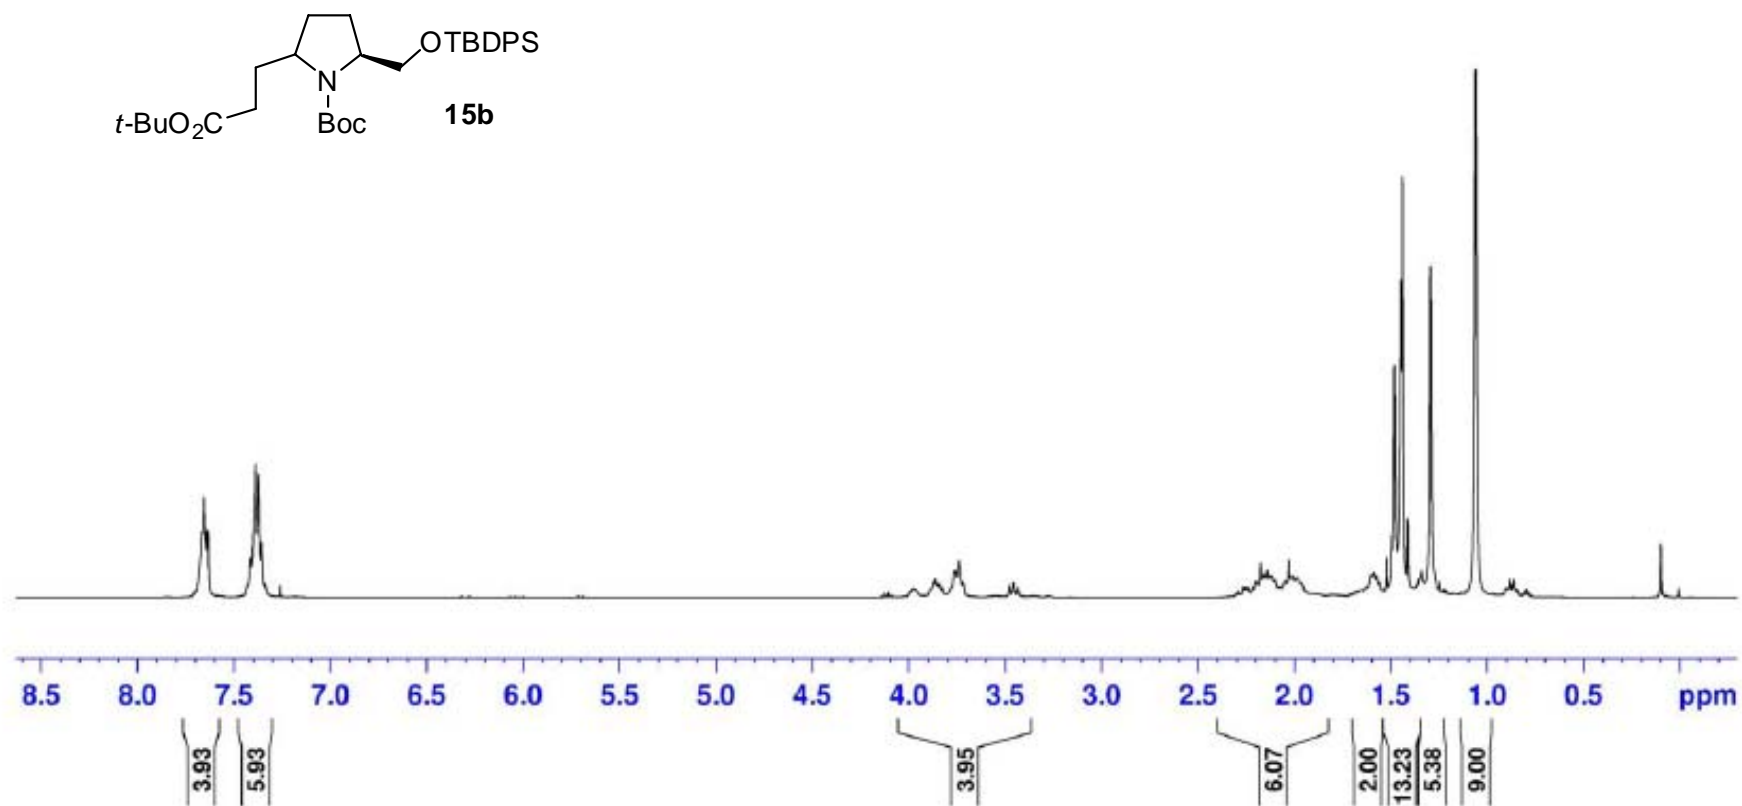

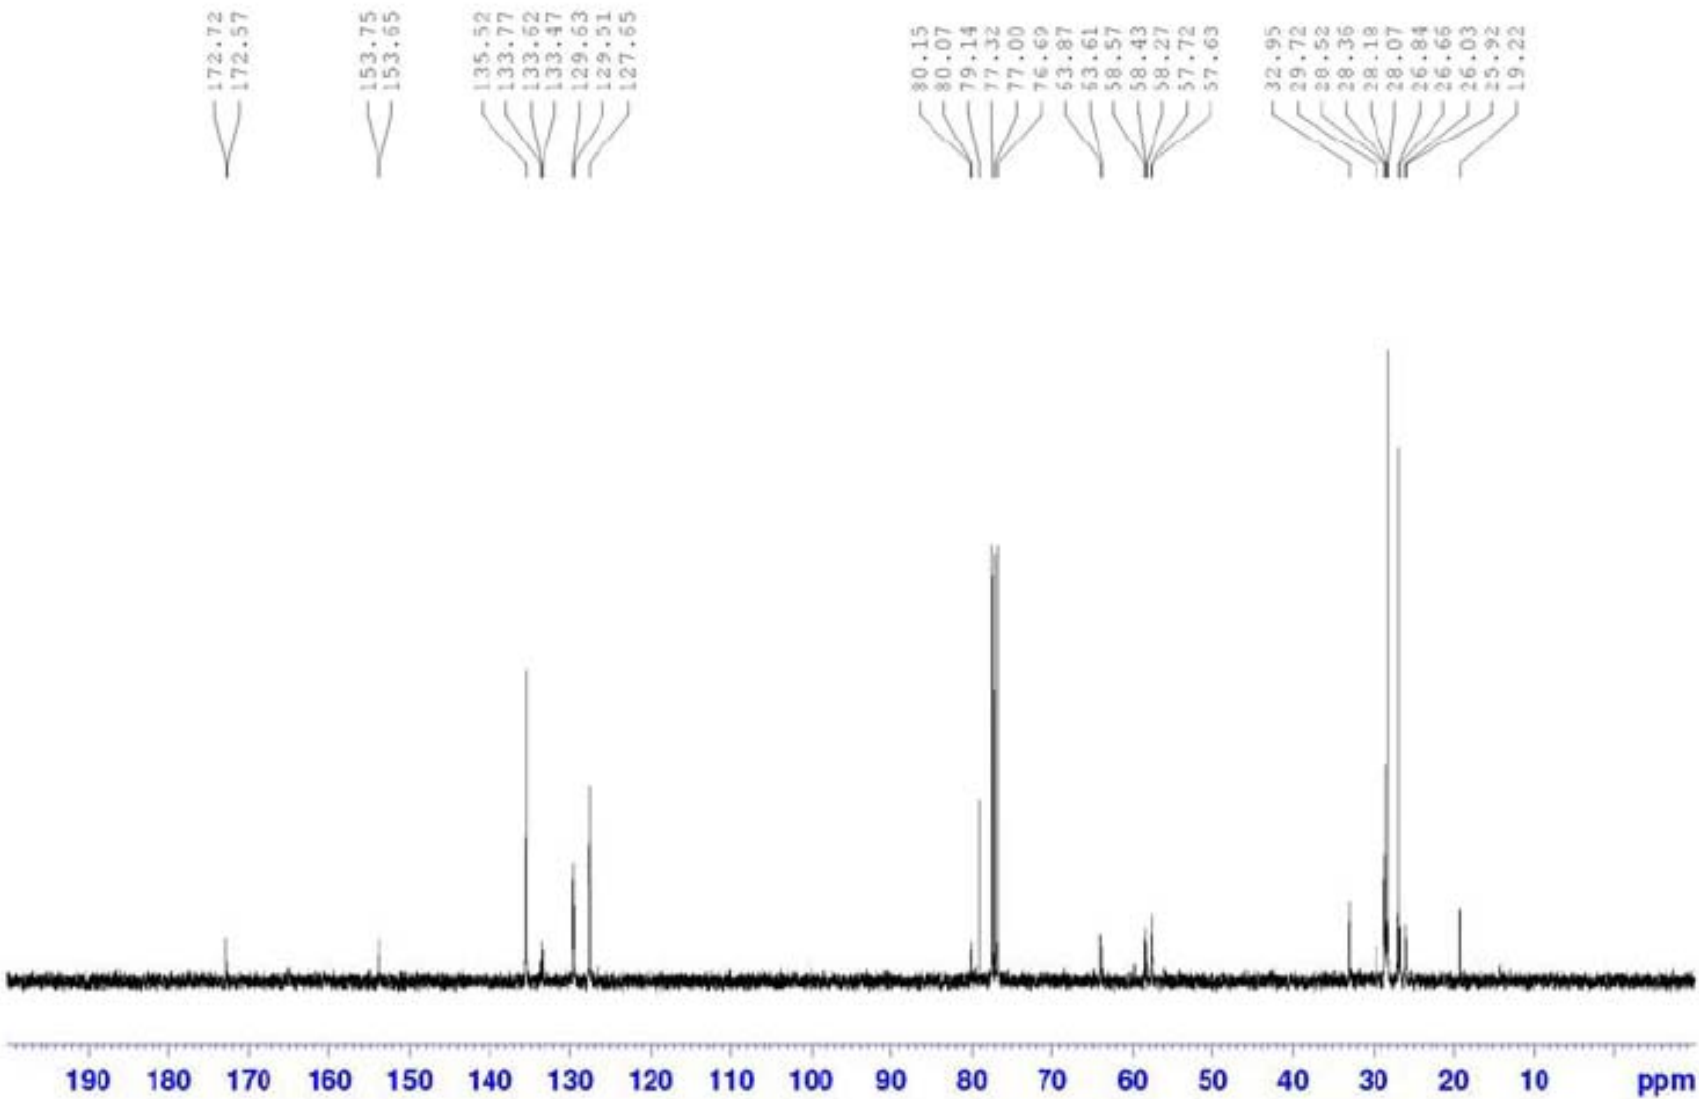

$^1\text{H}$  NMR and  $^{13}\text{C}$  NMR data of compound **15c**:

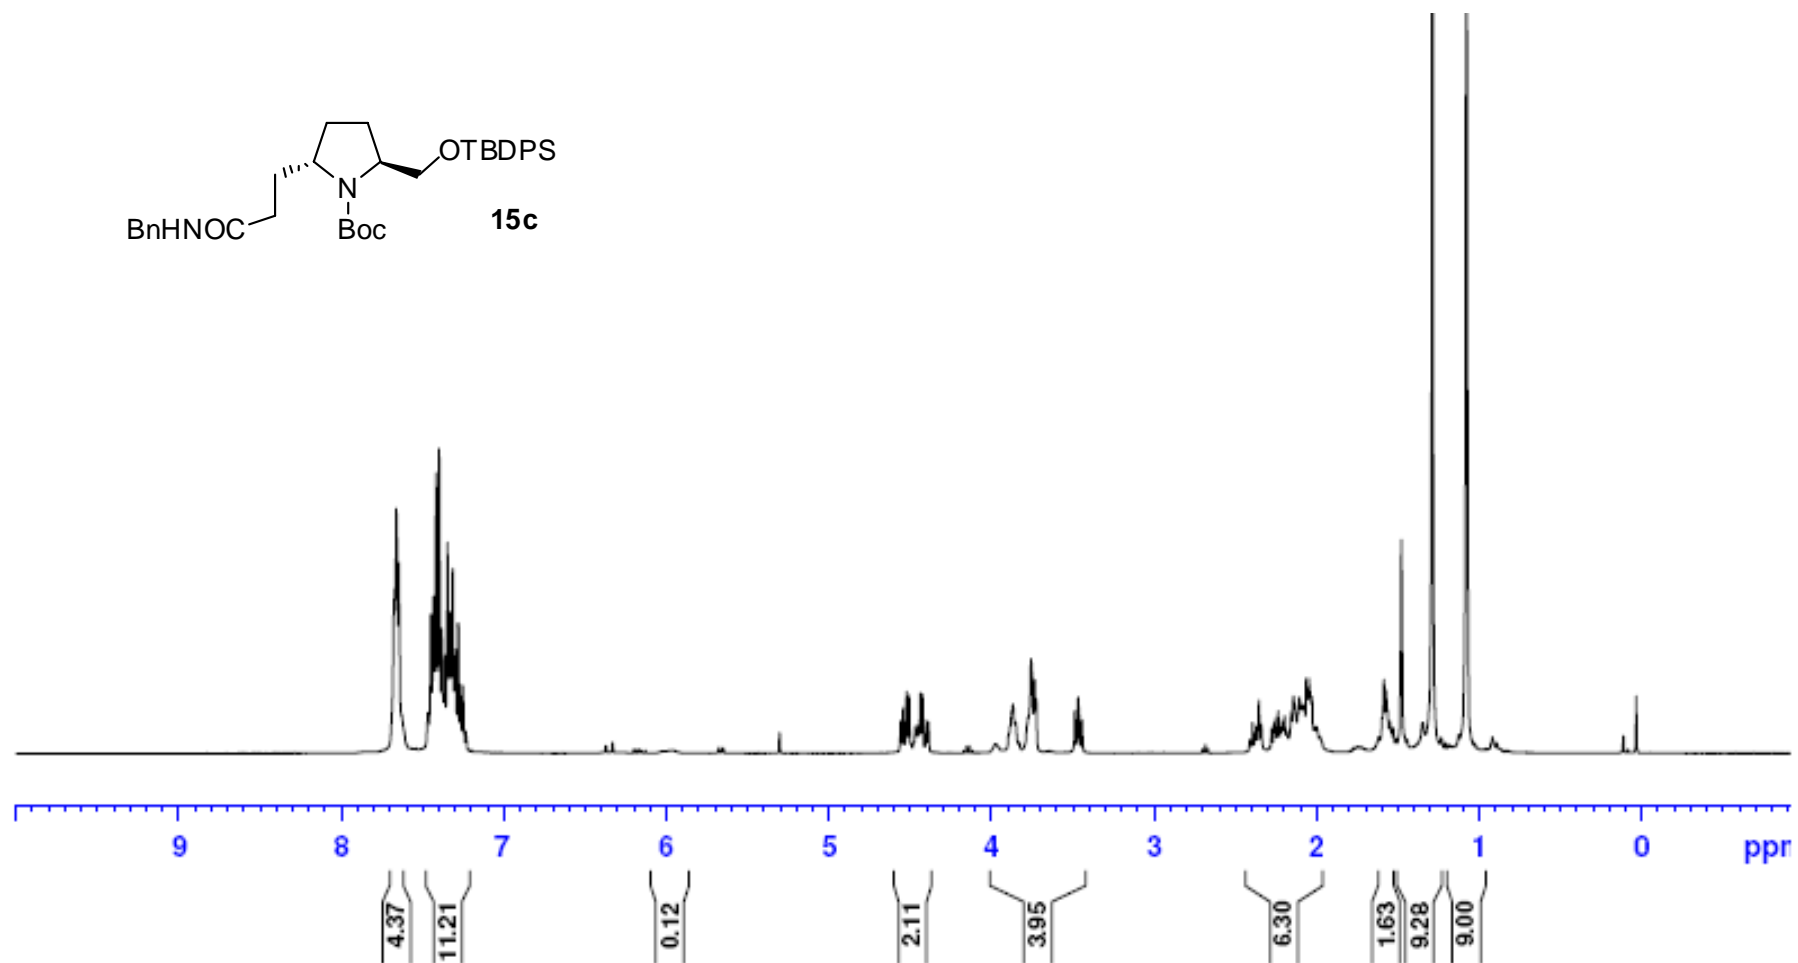

MJ-B-38  
CDCl<sub>3</sub>  
101230

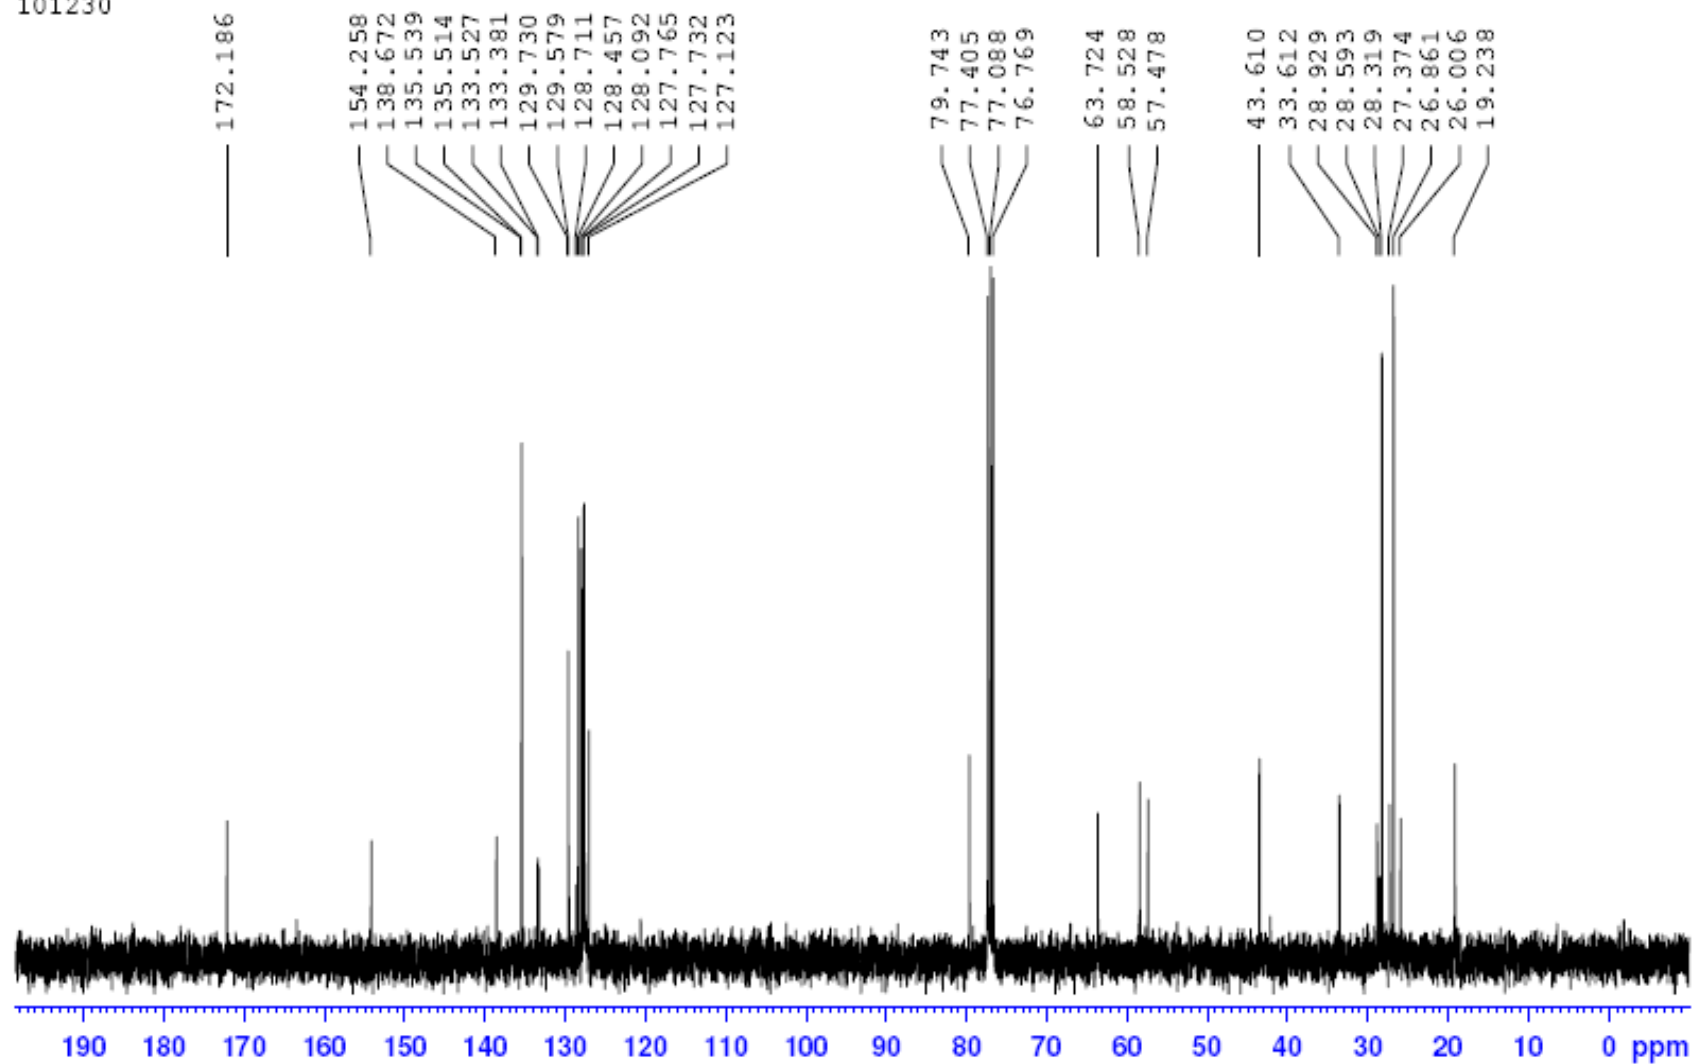

$^1\text{H}$  NMR and  $^{13}\text{C}$  NMR data of compound **15d**:

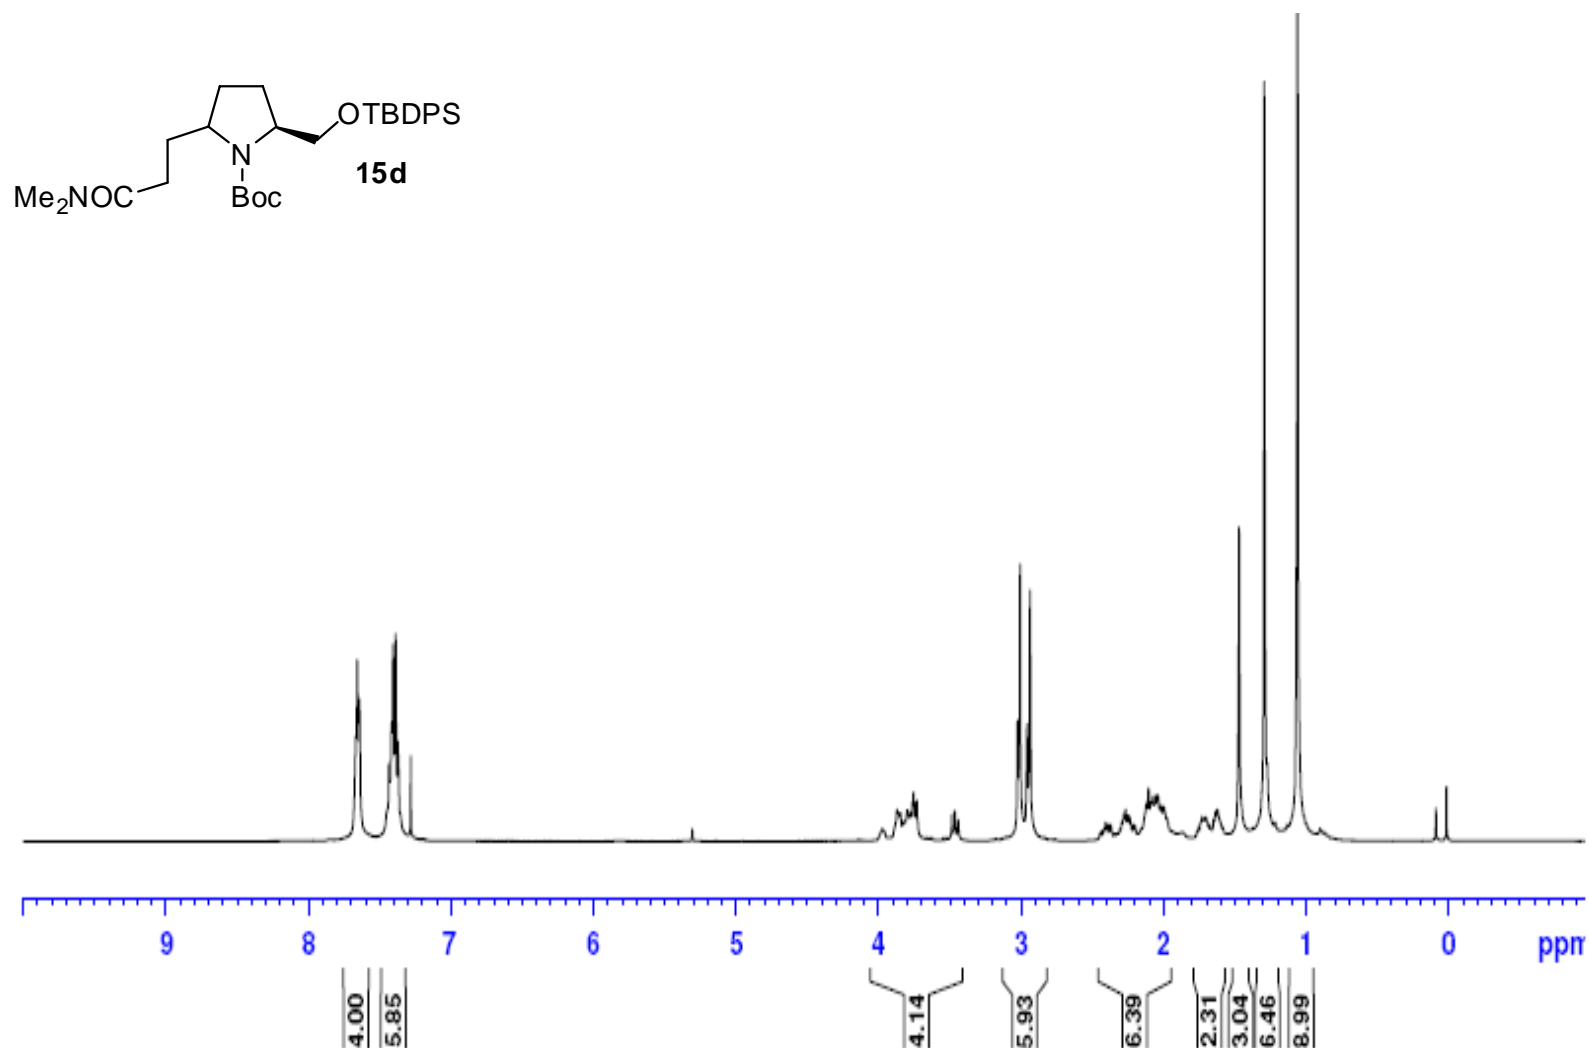

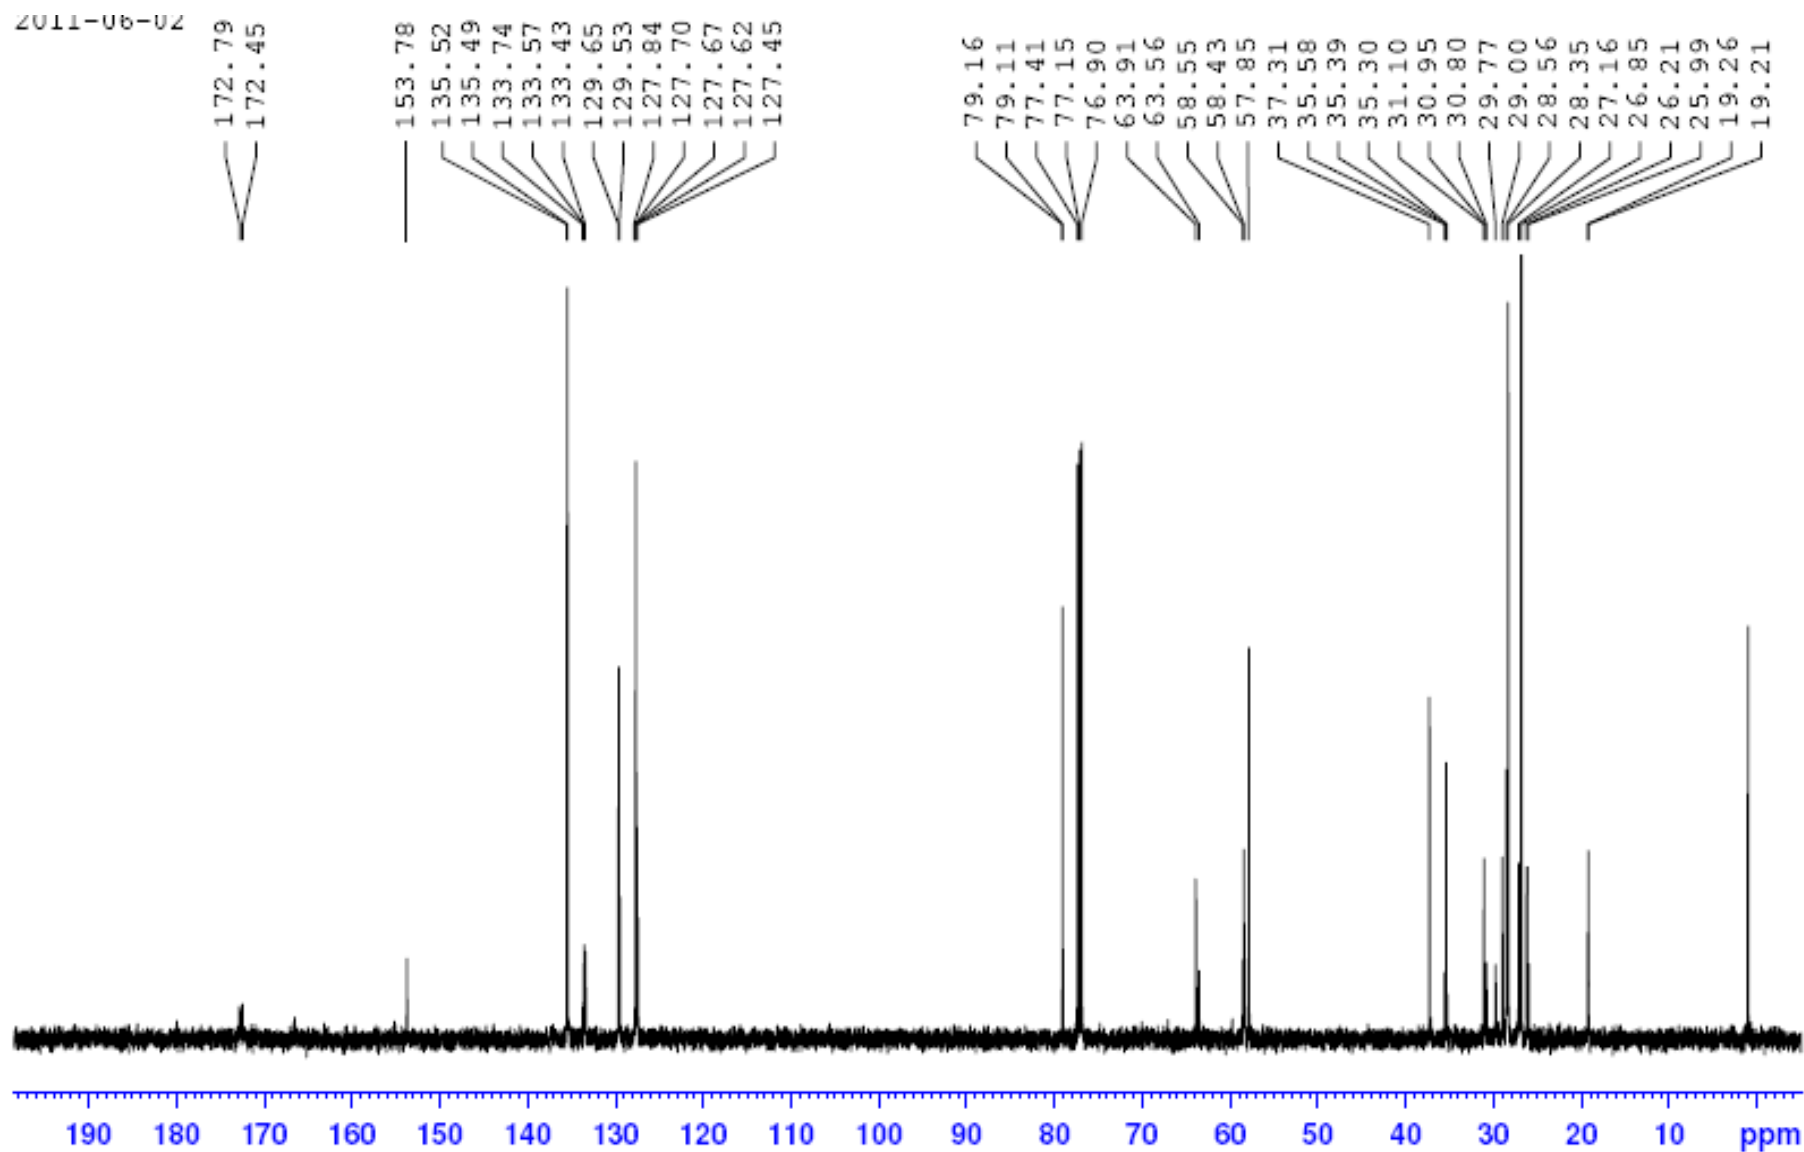



$^1\text{H}$  NMR and  $^{13}\text{C}$  NMR data of compound **15e**:

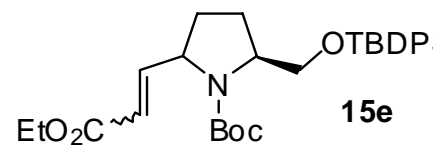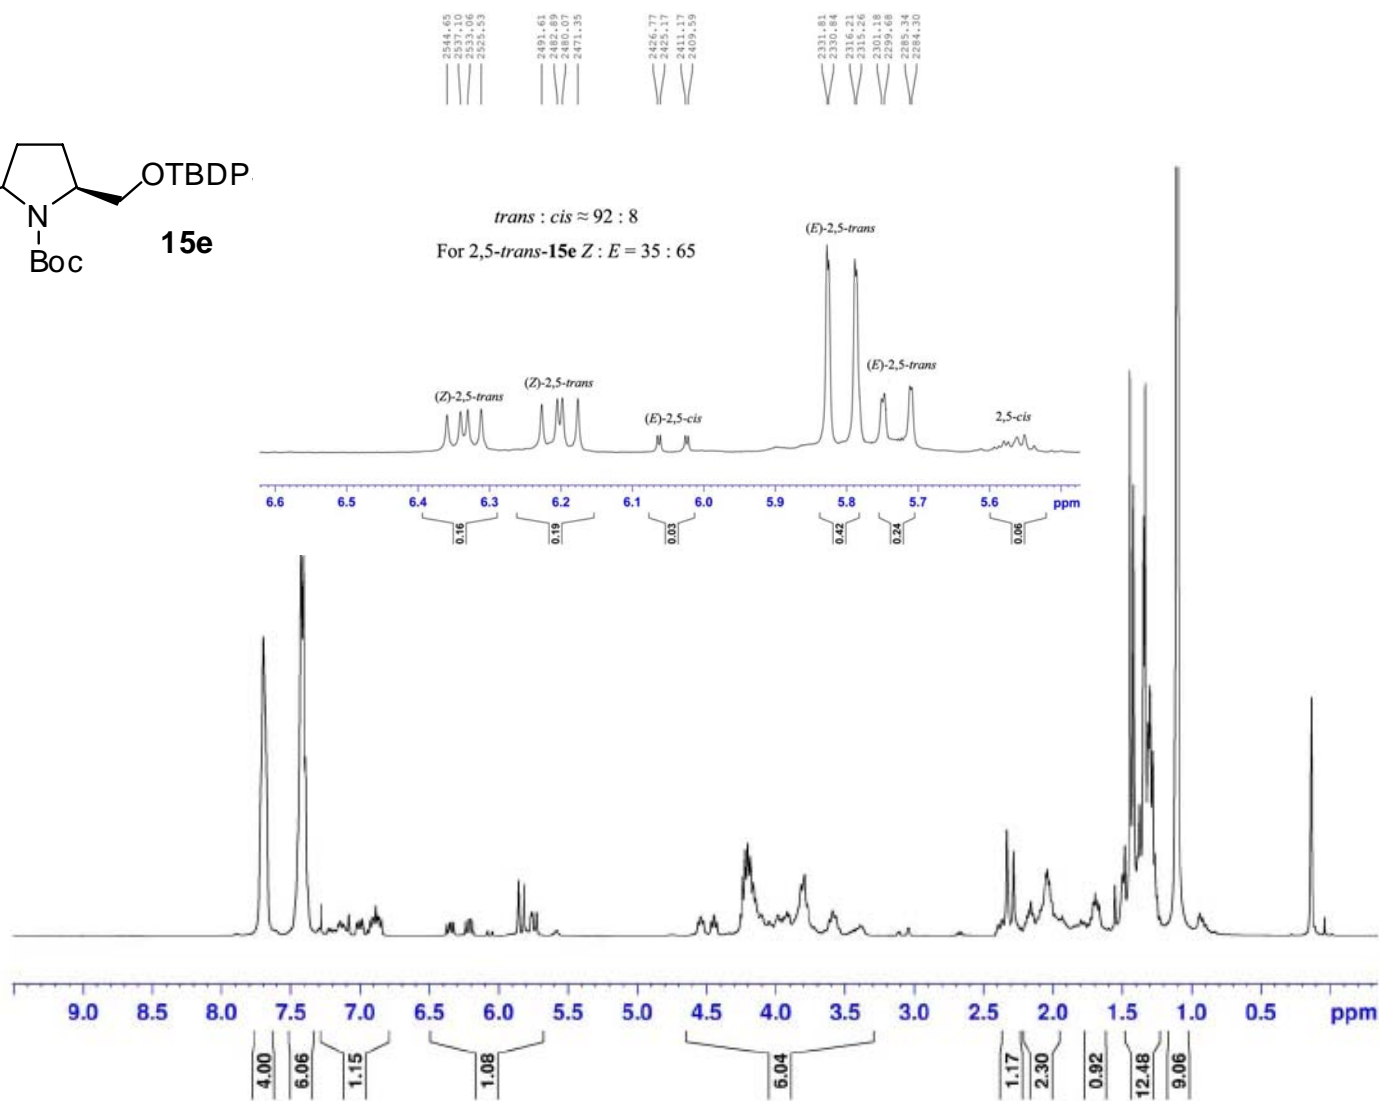

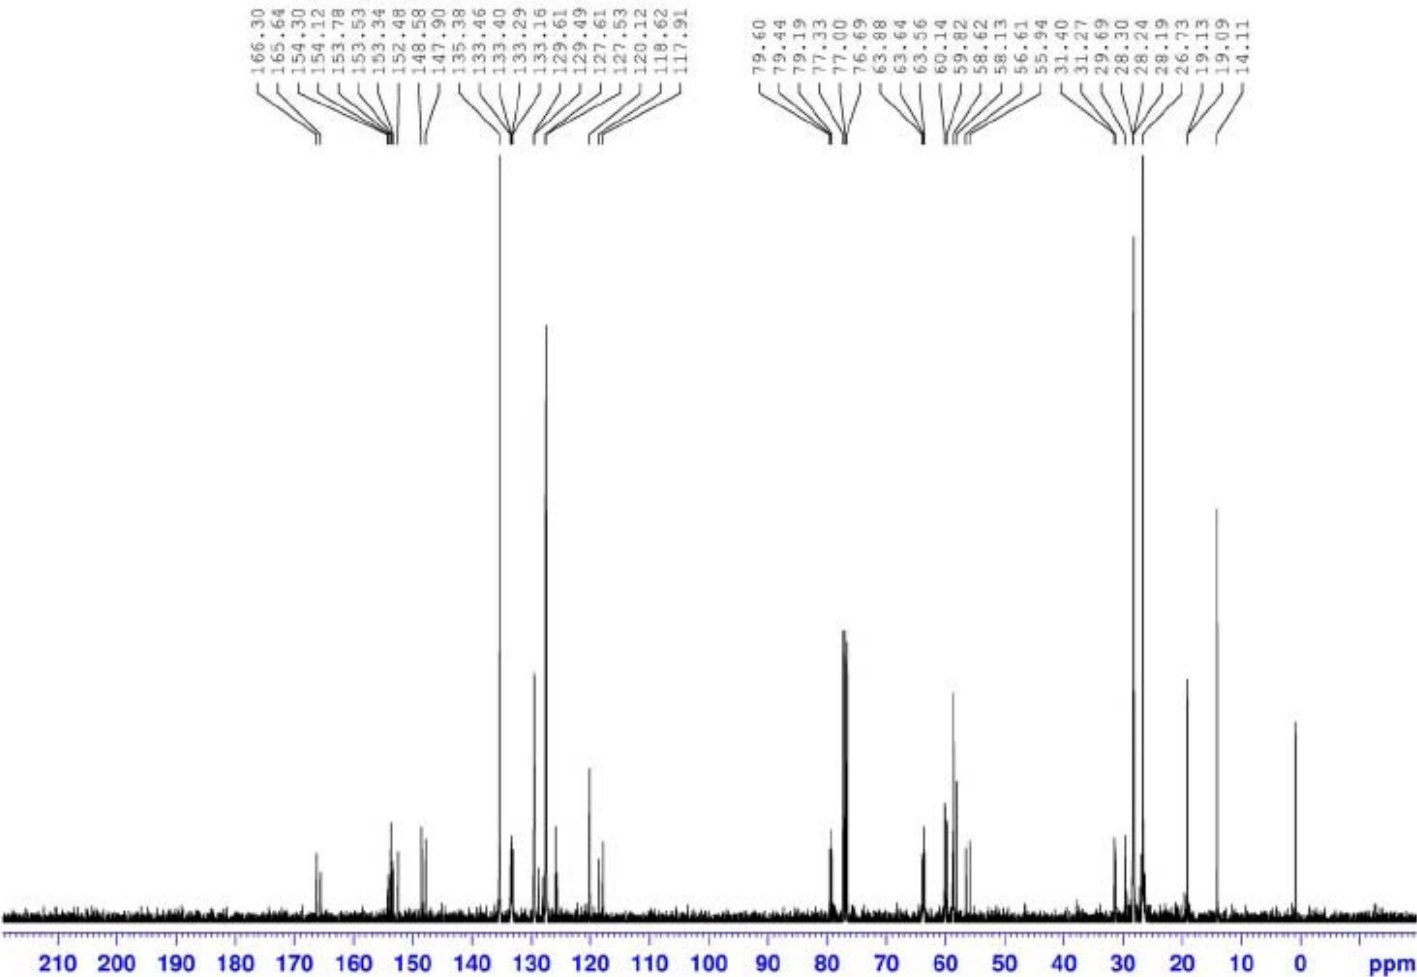

<sup>1</sup>H NMR and <sup>13</sup>C NMR data of compound **15f**:

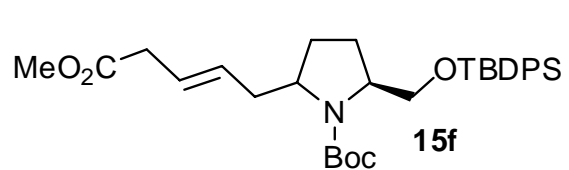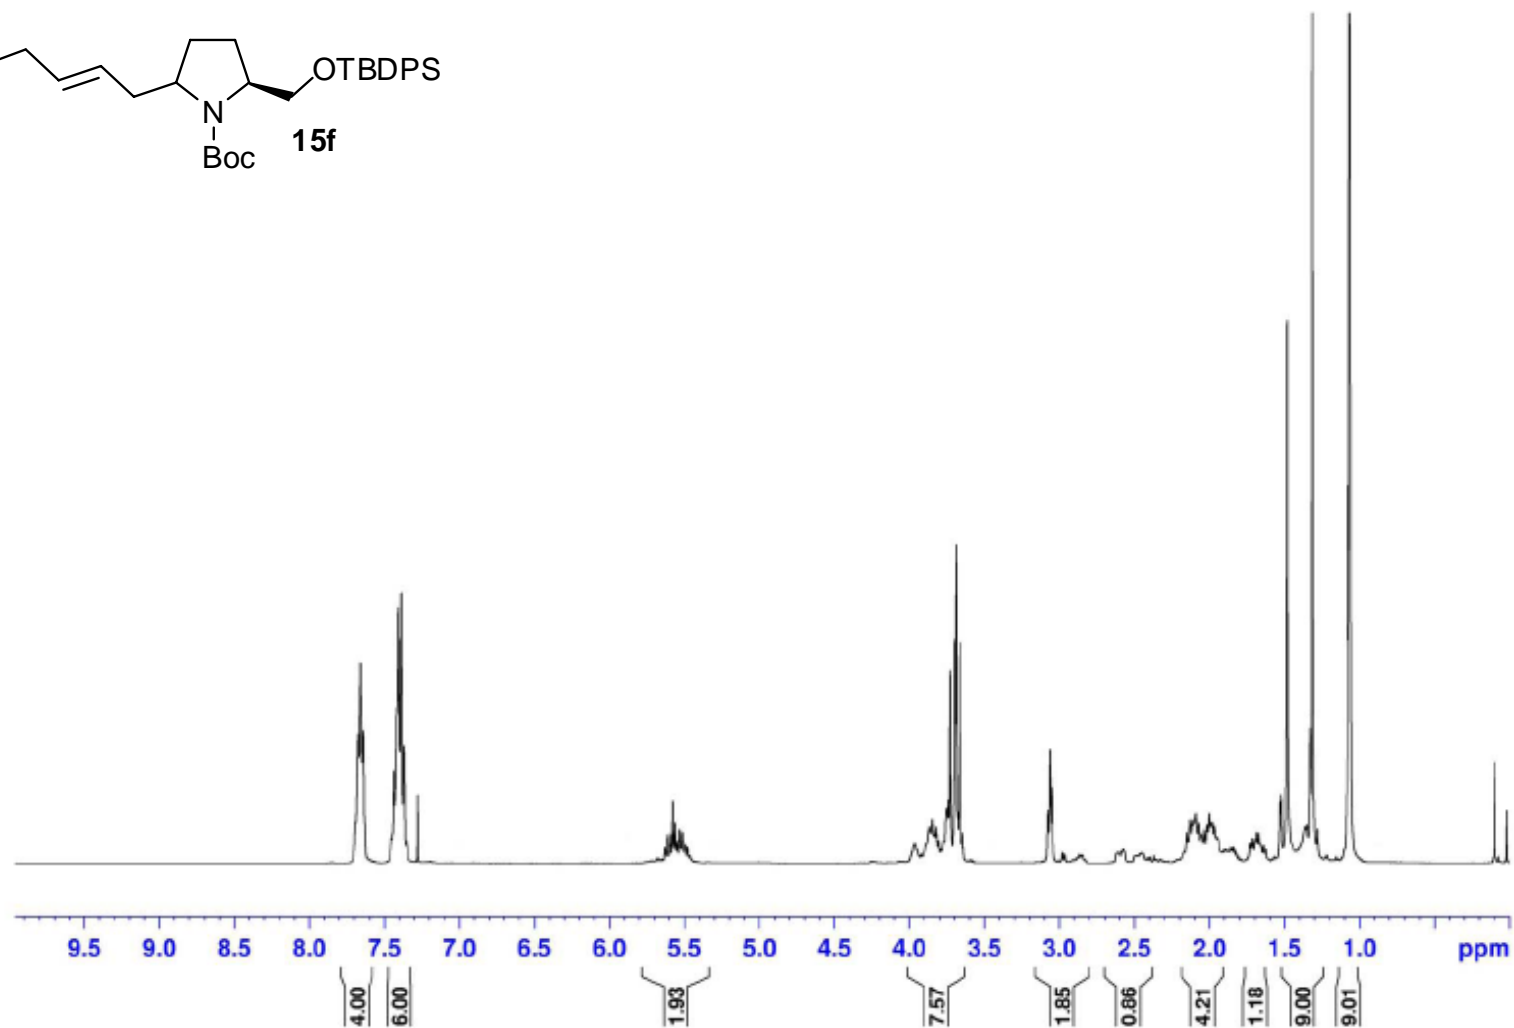

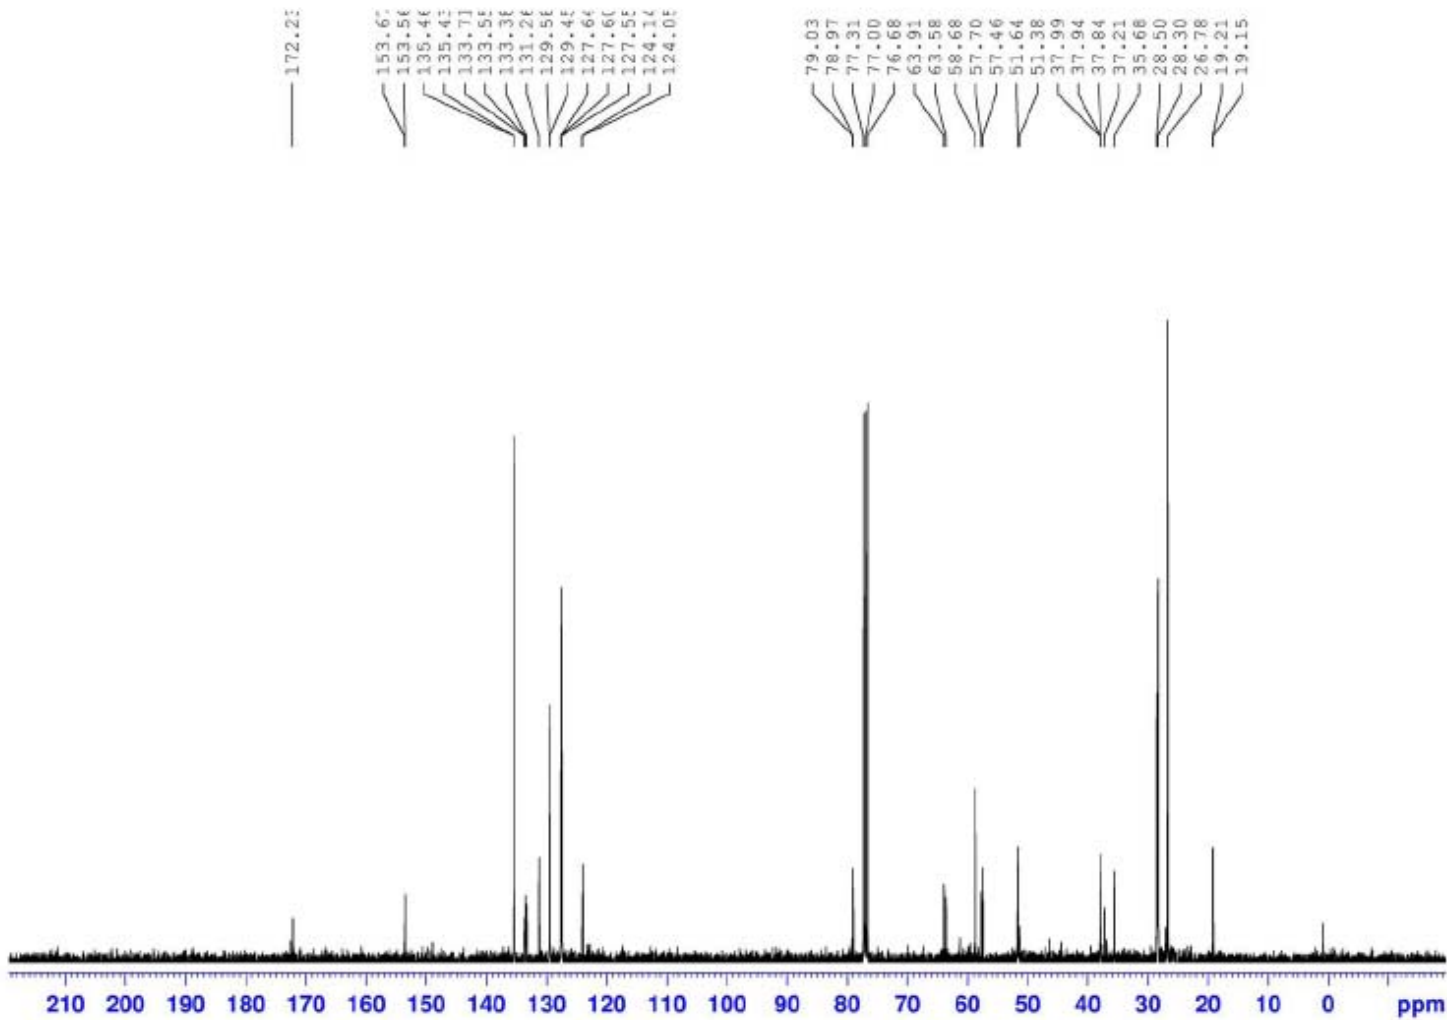

$^1\text{H}$  NMR and  $^{13}\text{C}$  NMR data of compound **16**:

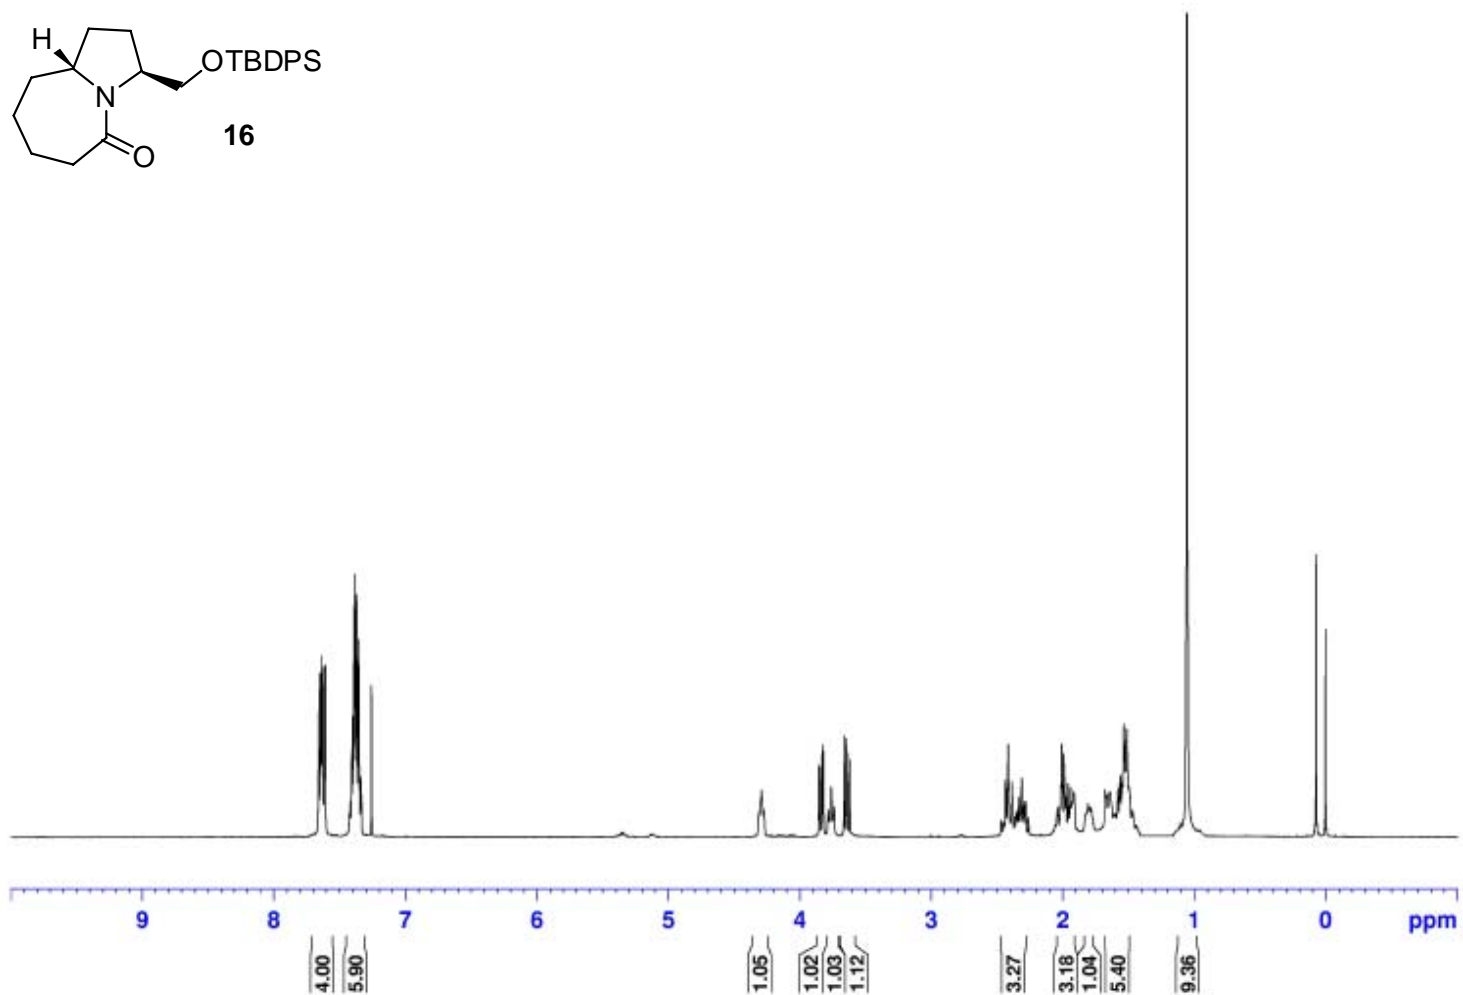

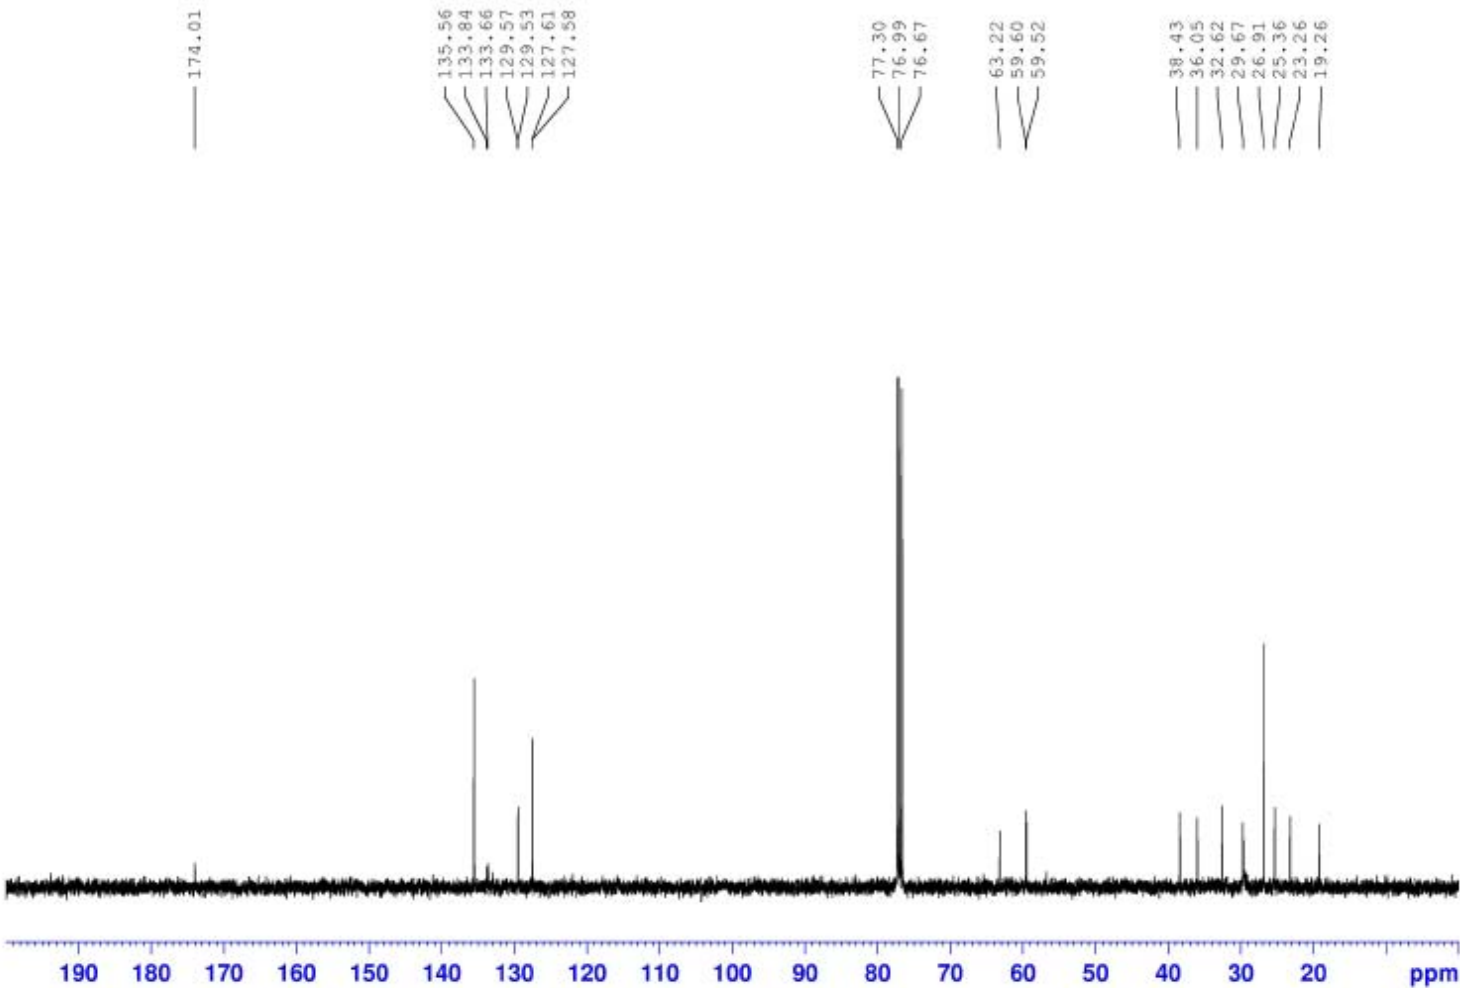

$^1\text{H}$  NMR and  $^{13}\text{C}$  NMR data of compound **17**:

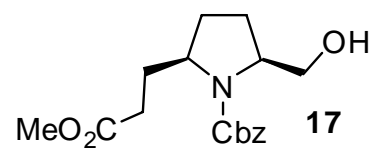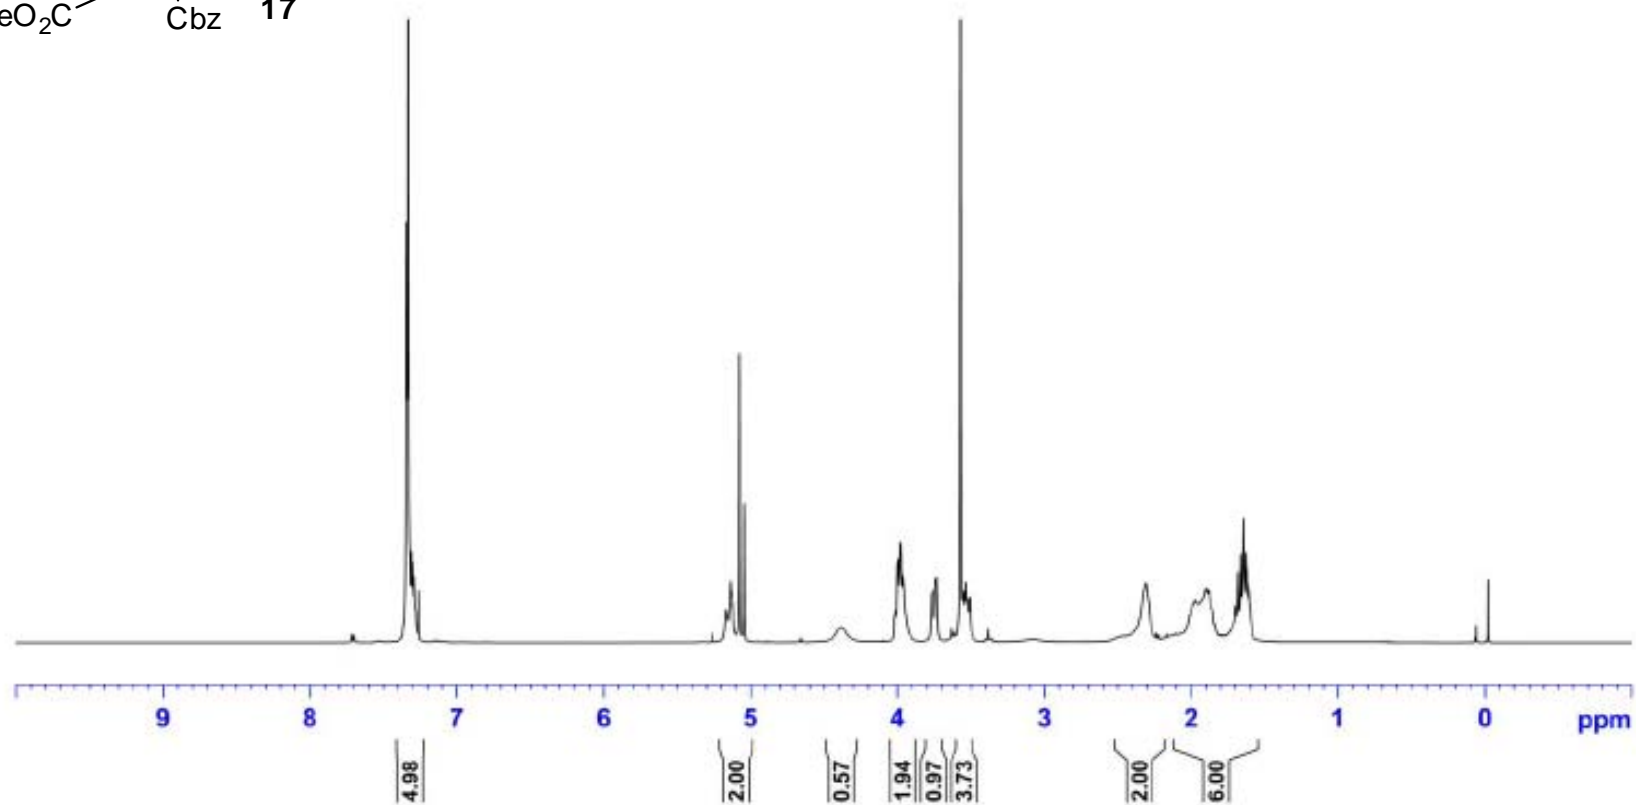

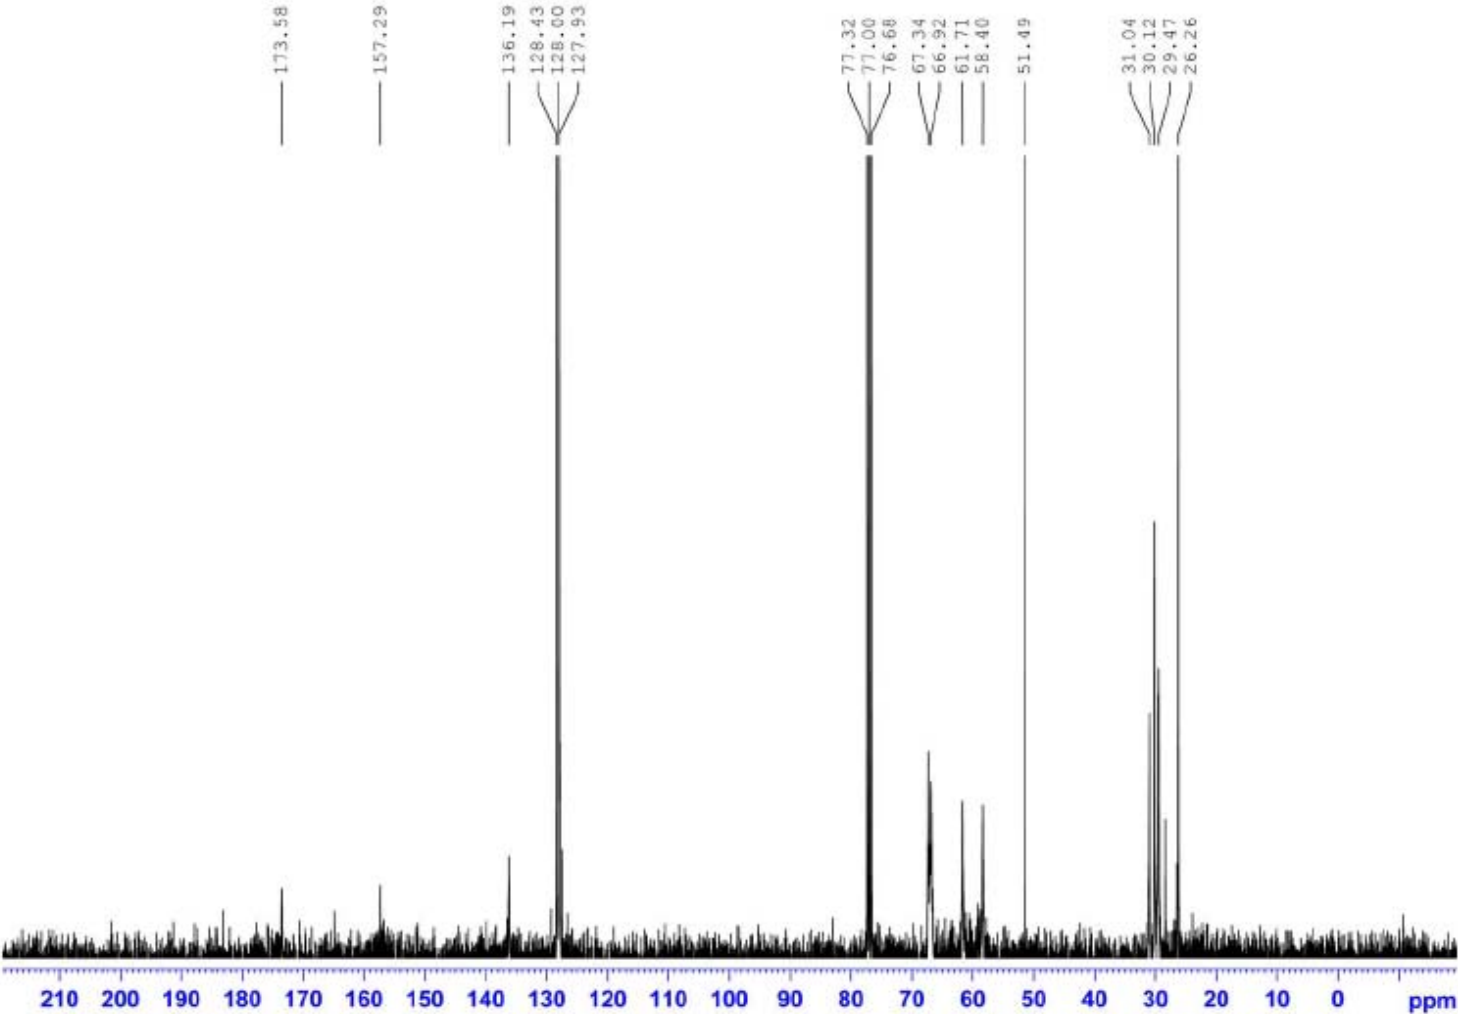



$^1\text{H}$  NMR and  $^{13}\text{C}$  NMR data of compound **18**:

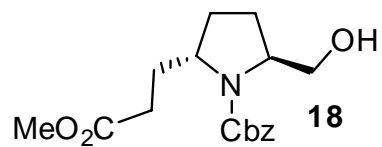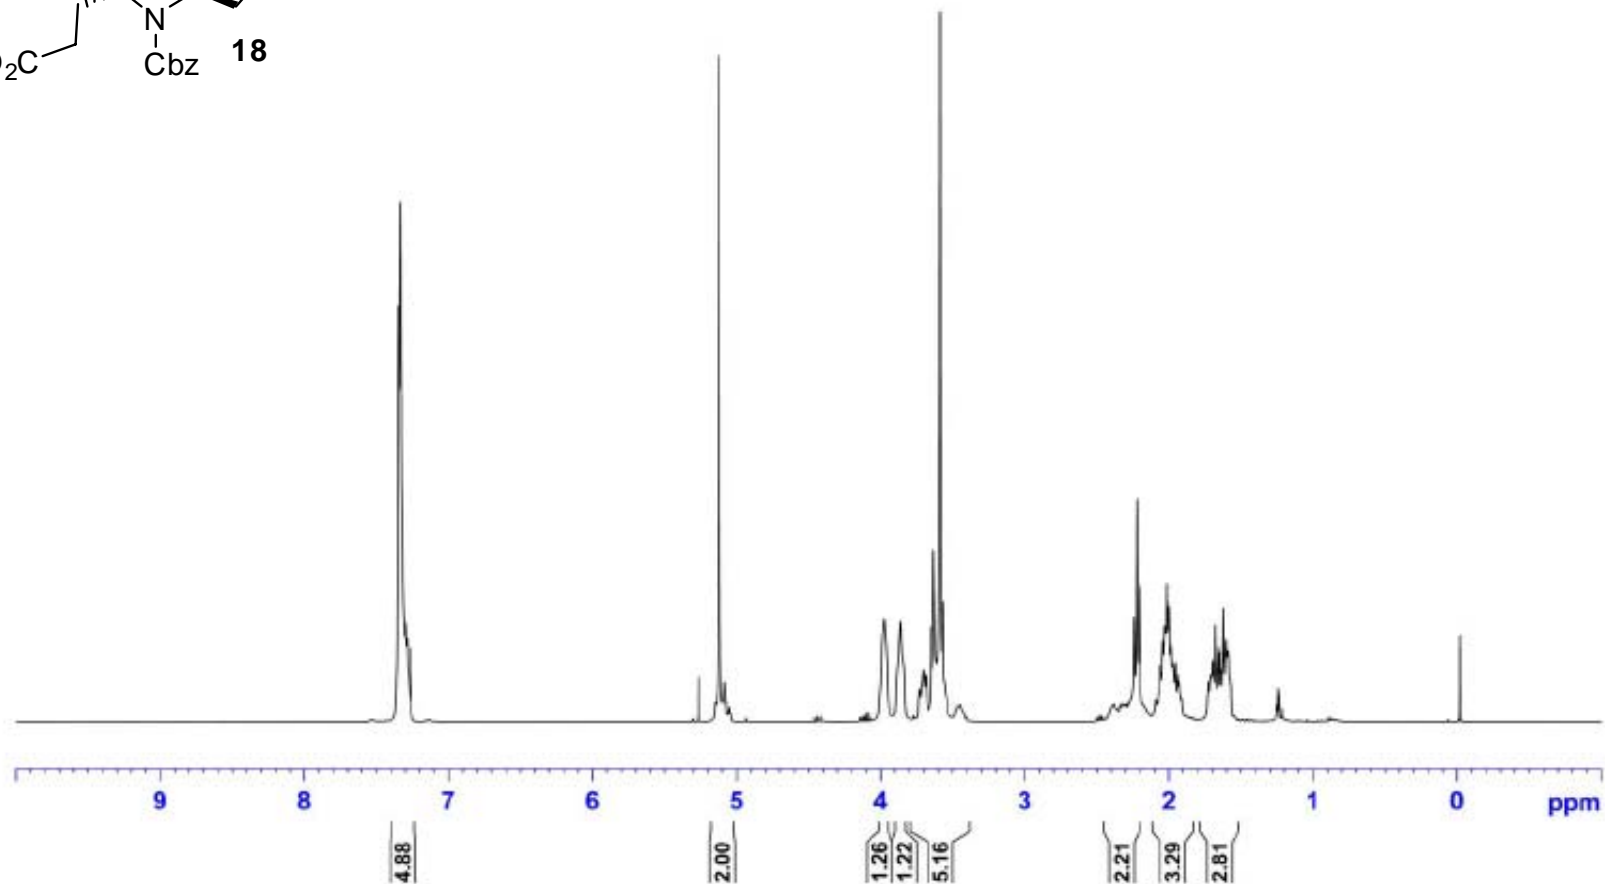

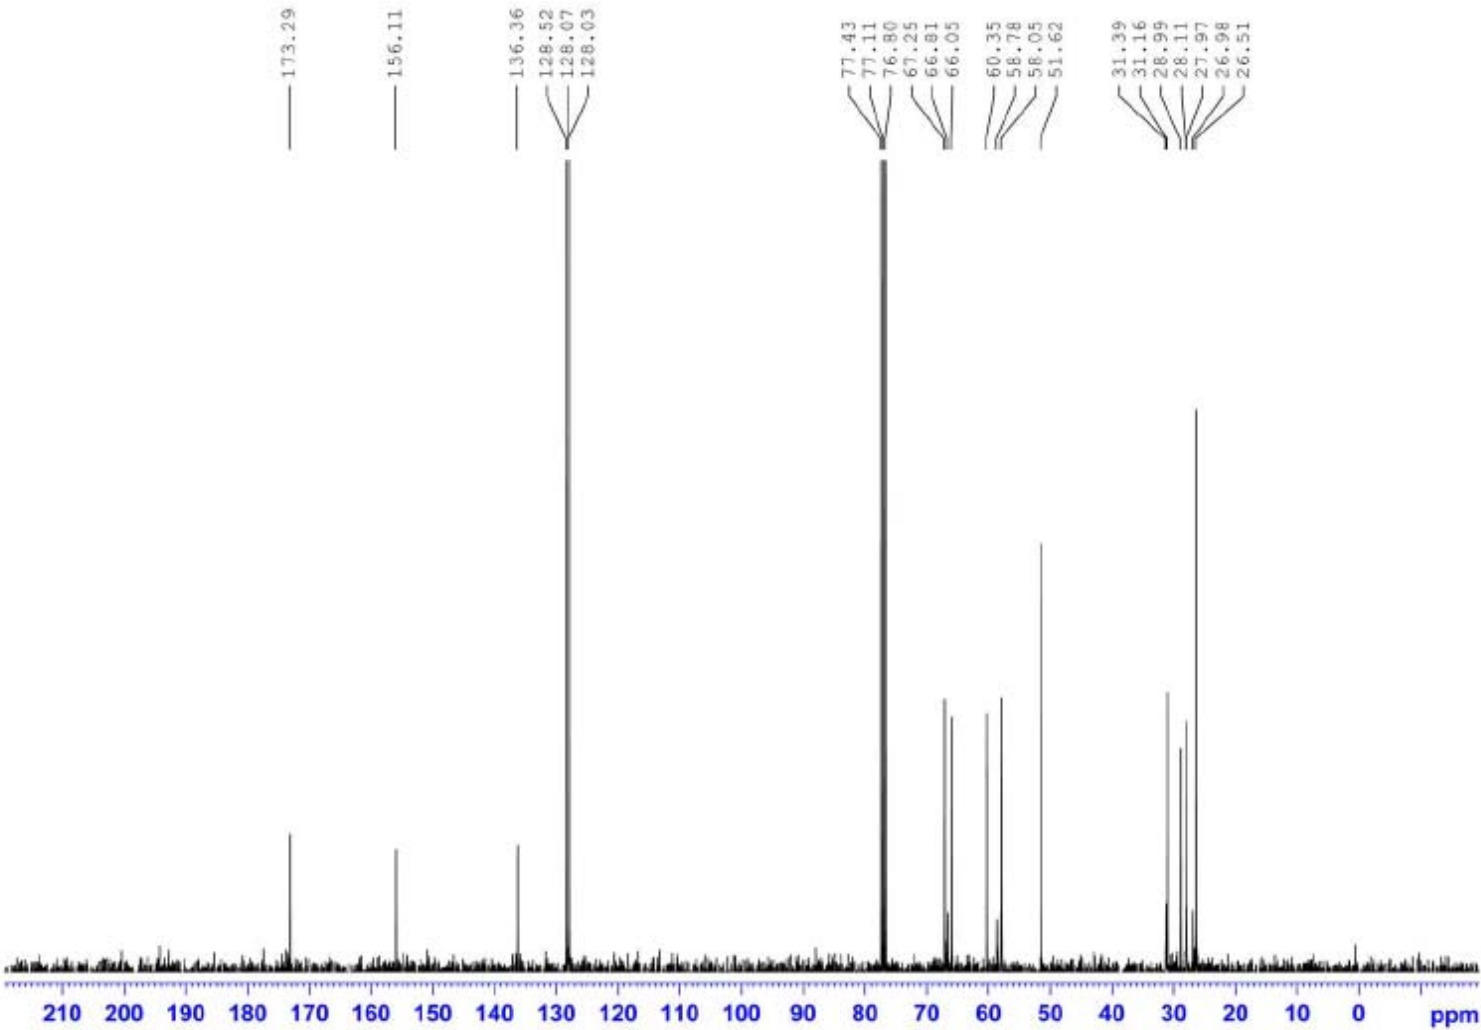

$^1\text{H}$  NMR and  $^{13}\text{C}$  NMR data of compound **19**:

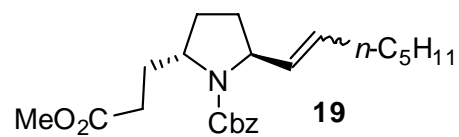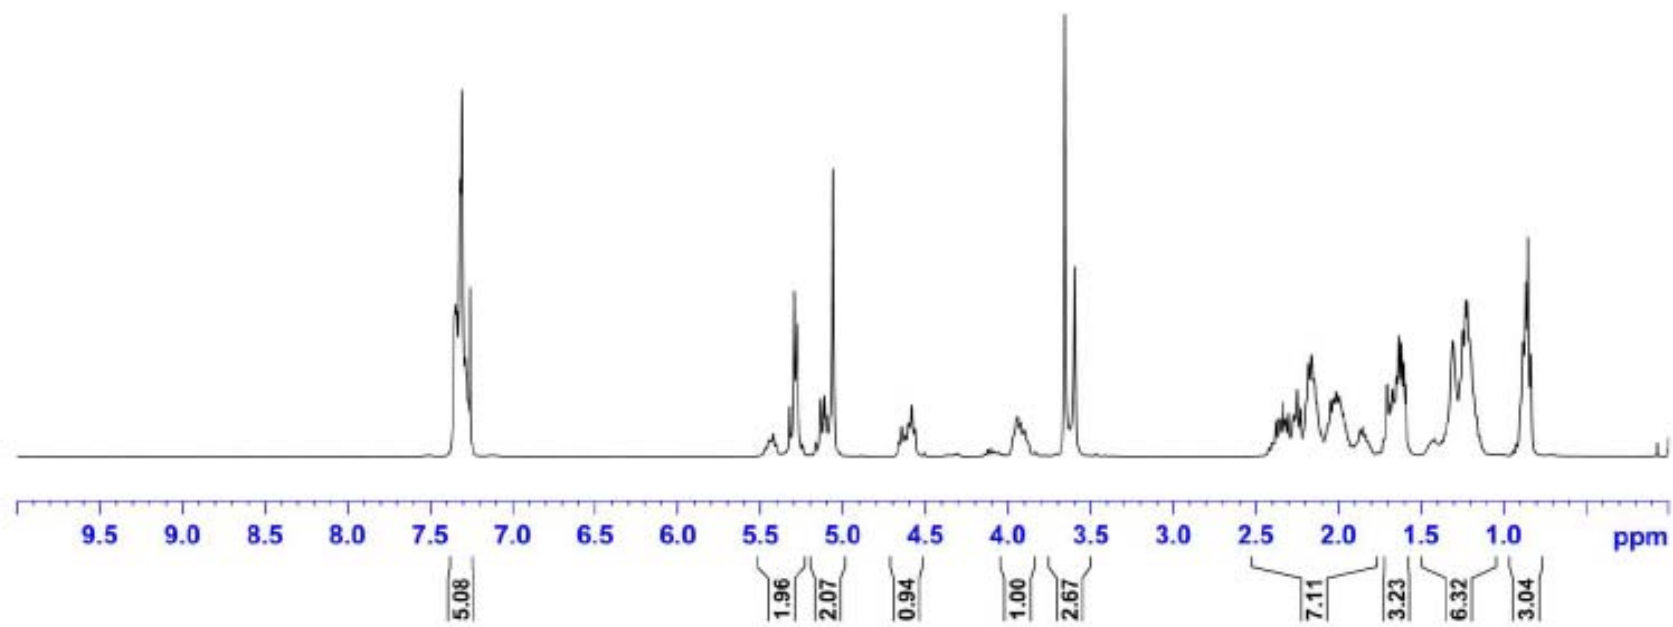

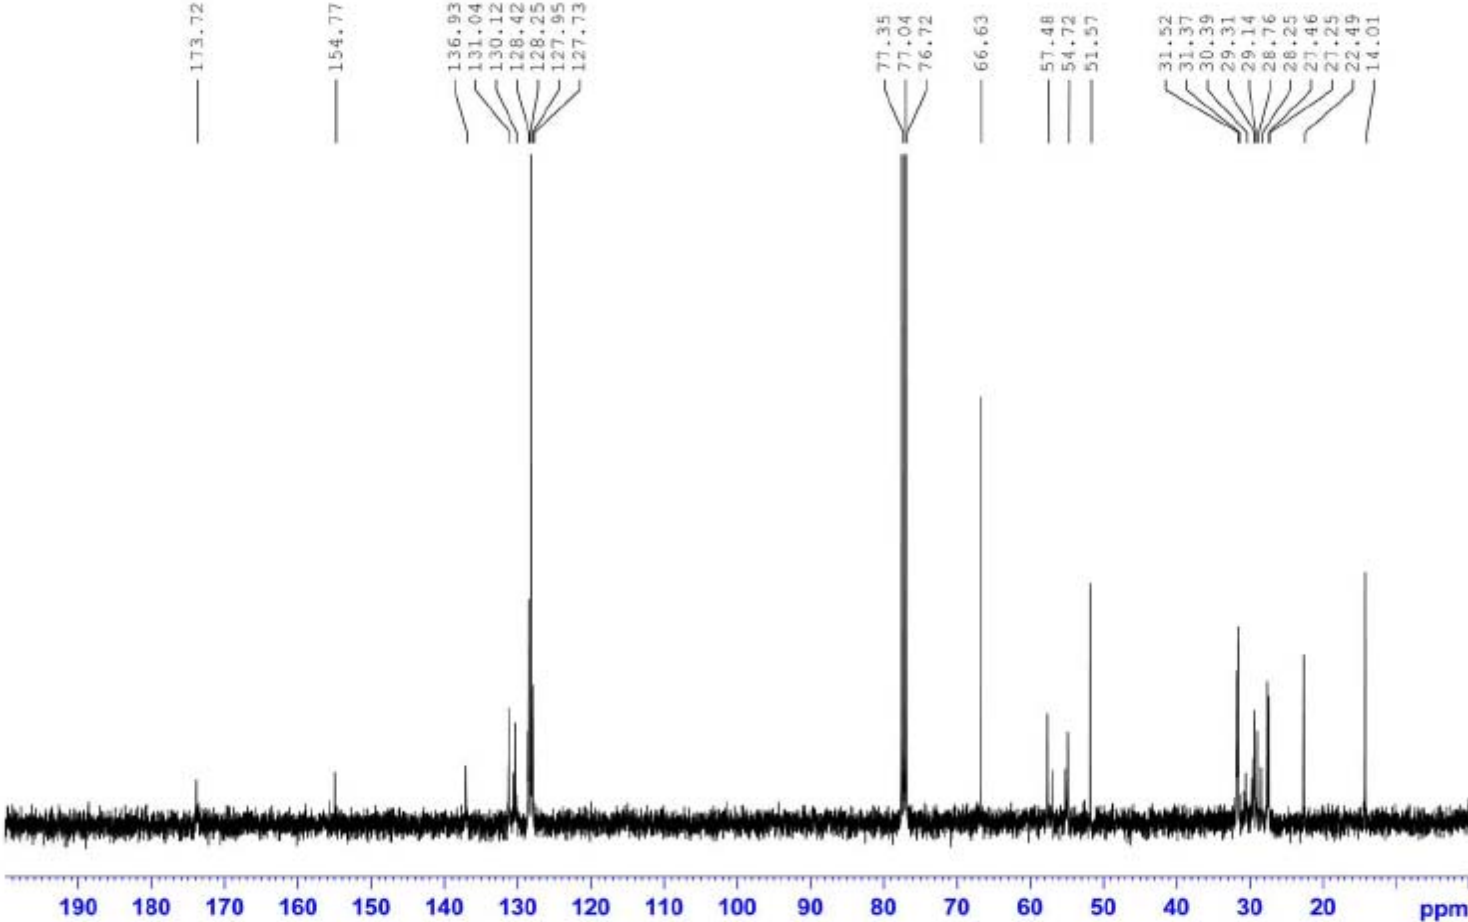

$^1\text{H}$  NMR and  $^{13}\text{C}$  NMR data of compound **20**:

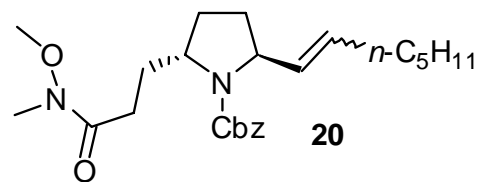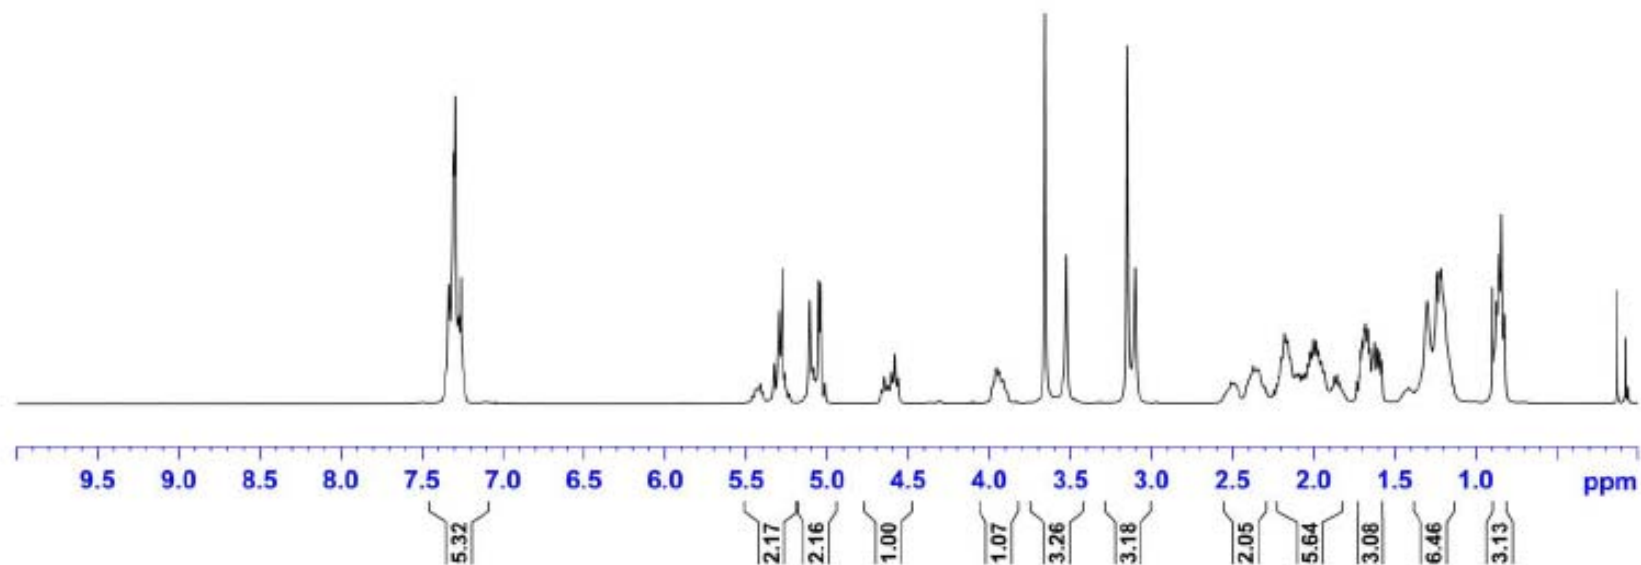

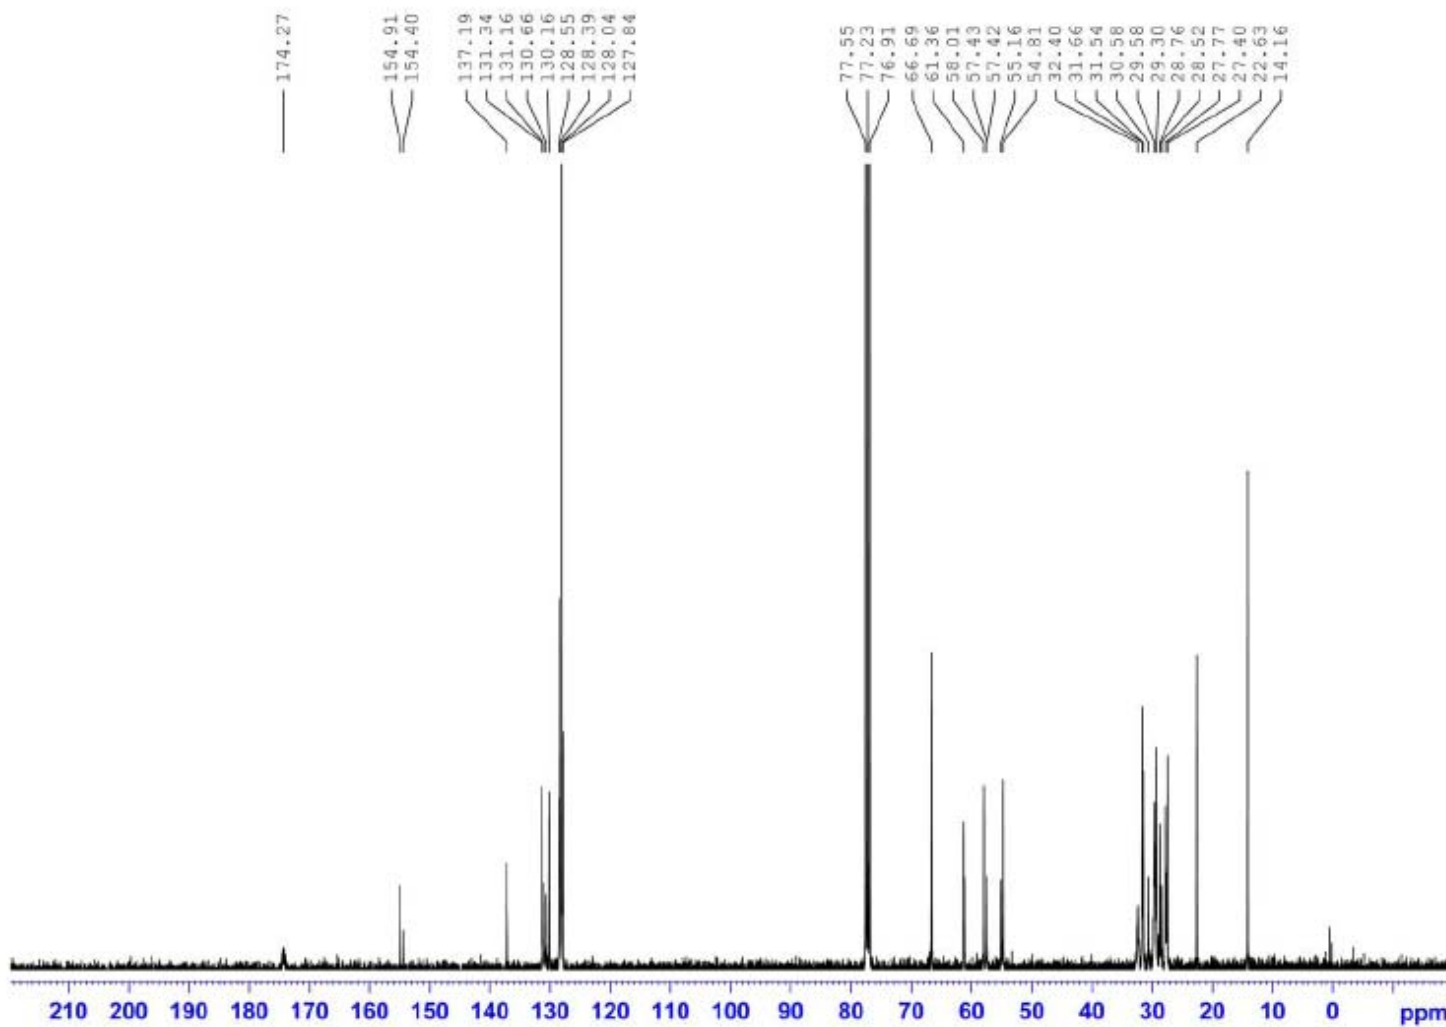

$^1\text{H}$  NMR and  $^{13}\text{C}$  NMR data of compound **21**:

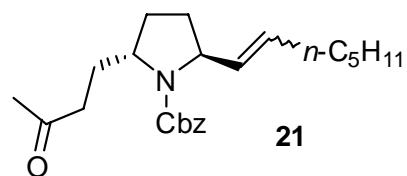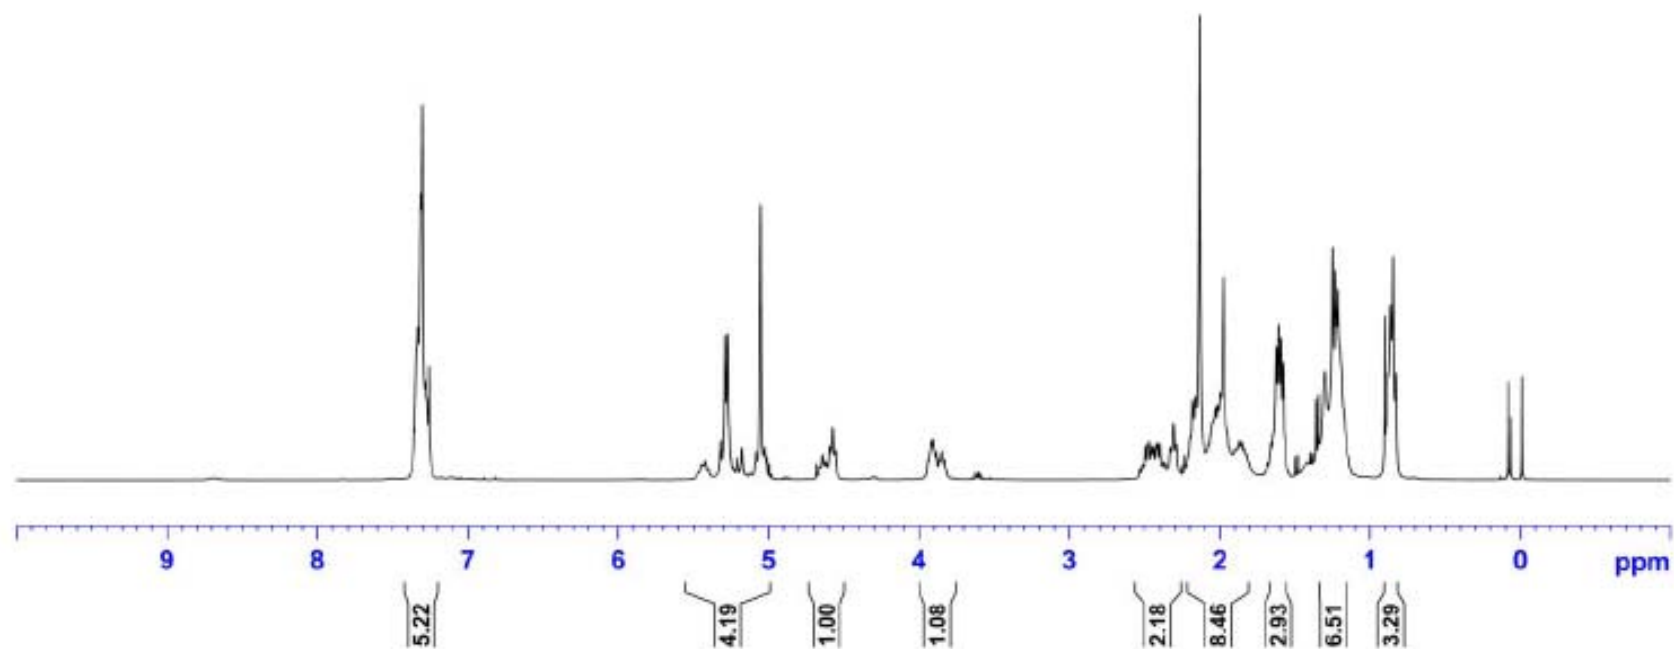

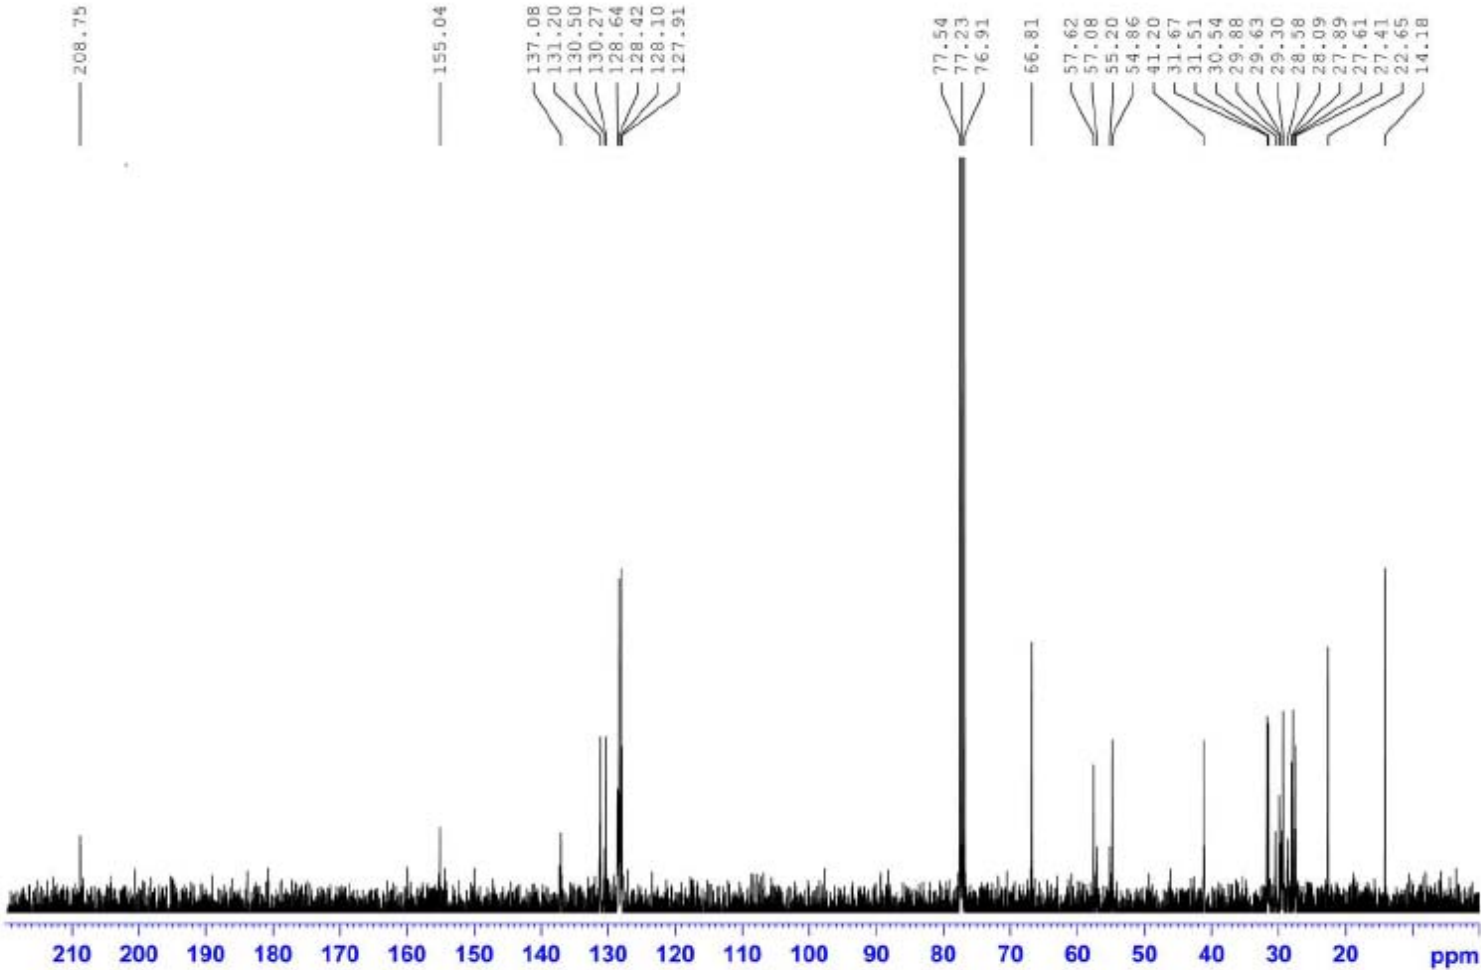



$^1\text{H}$  NMR and  $^{13}\text{C}$  NMR data of (–)-xenovenine (**ent-6**) :

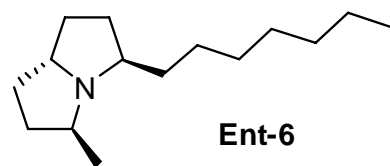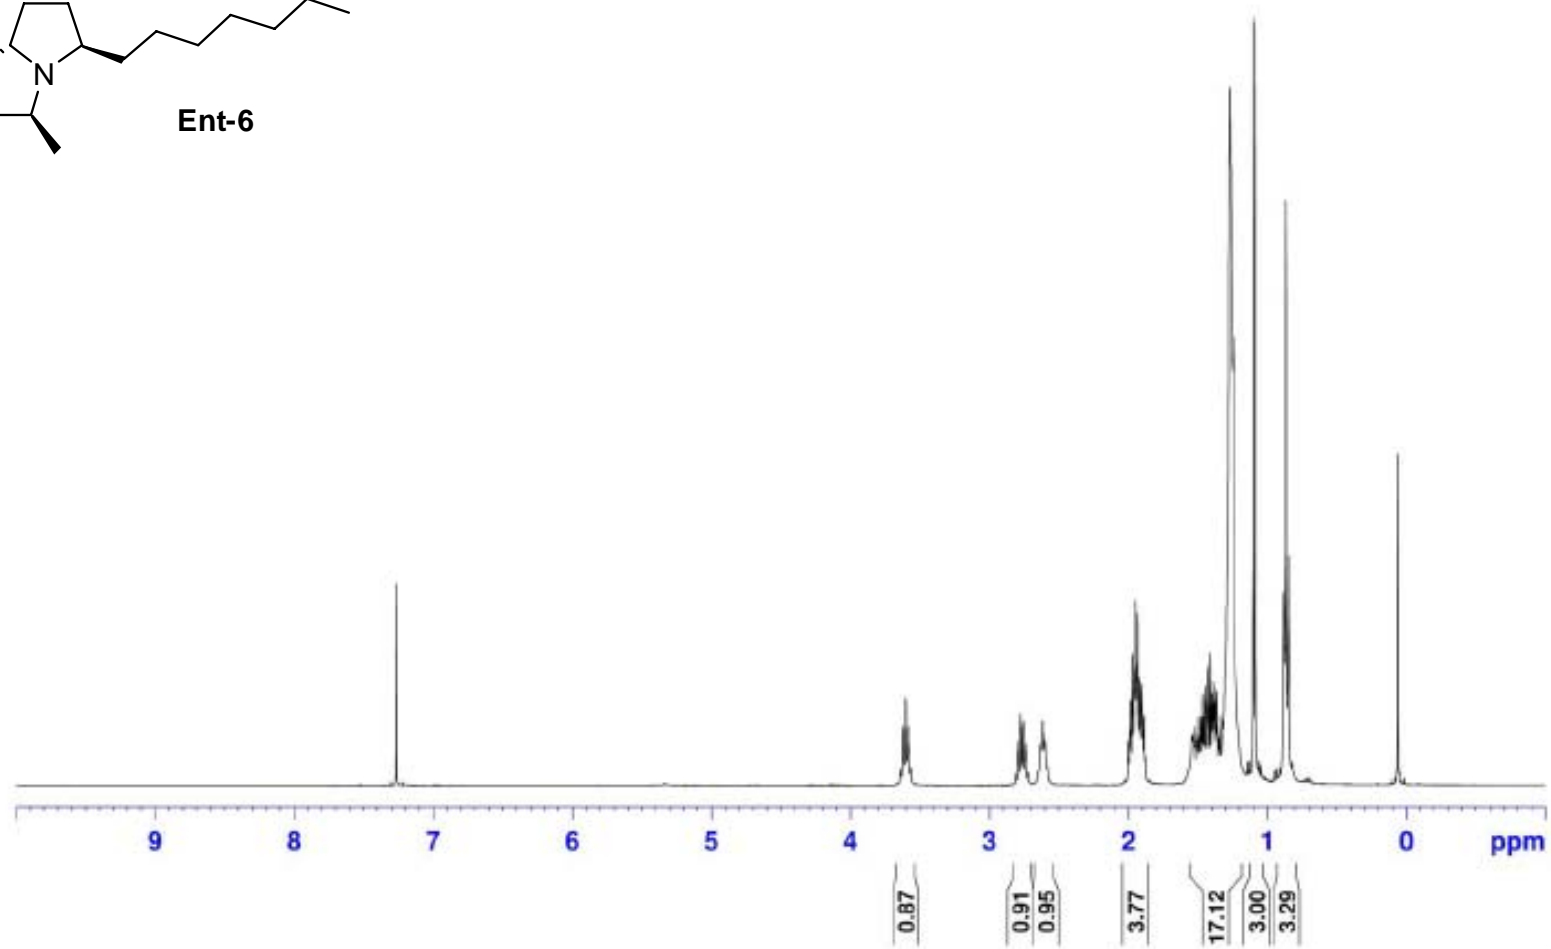

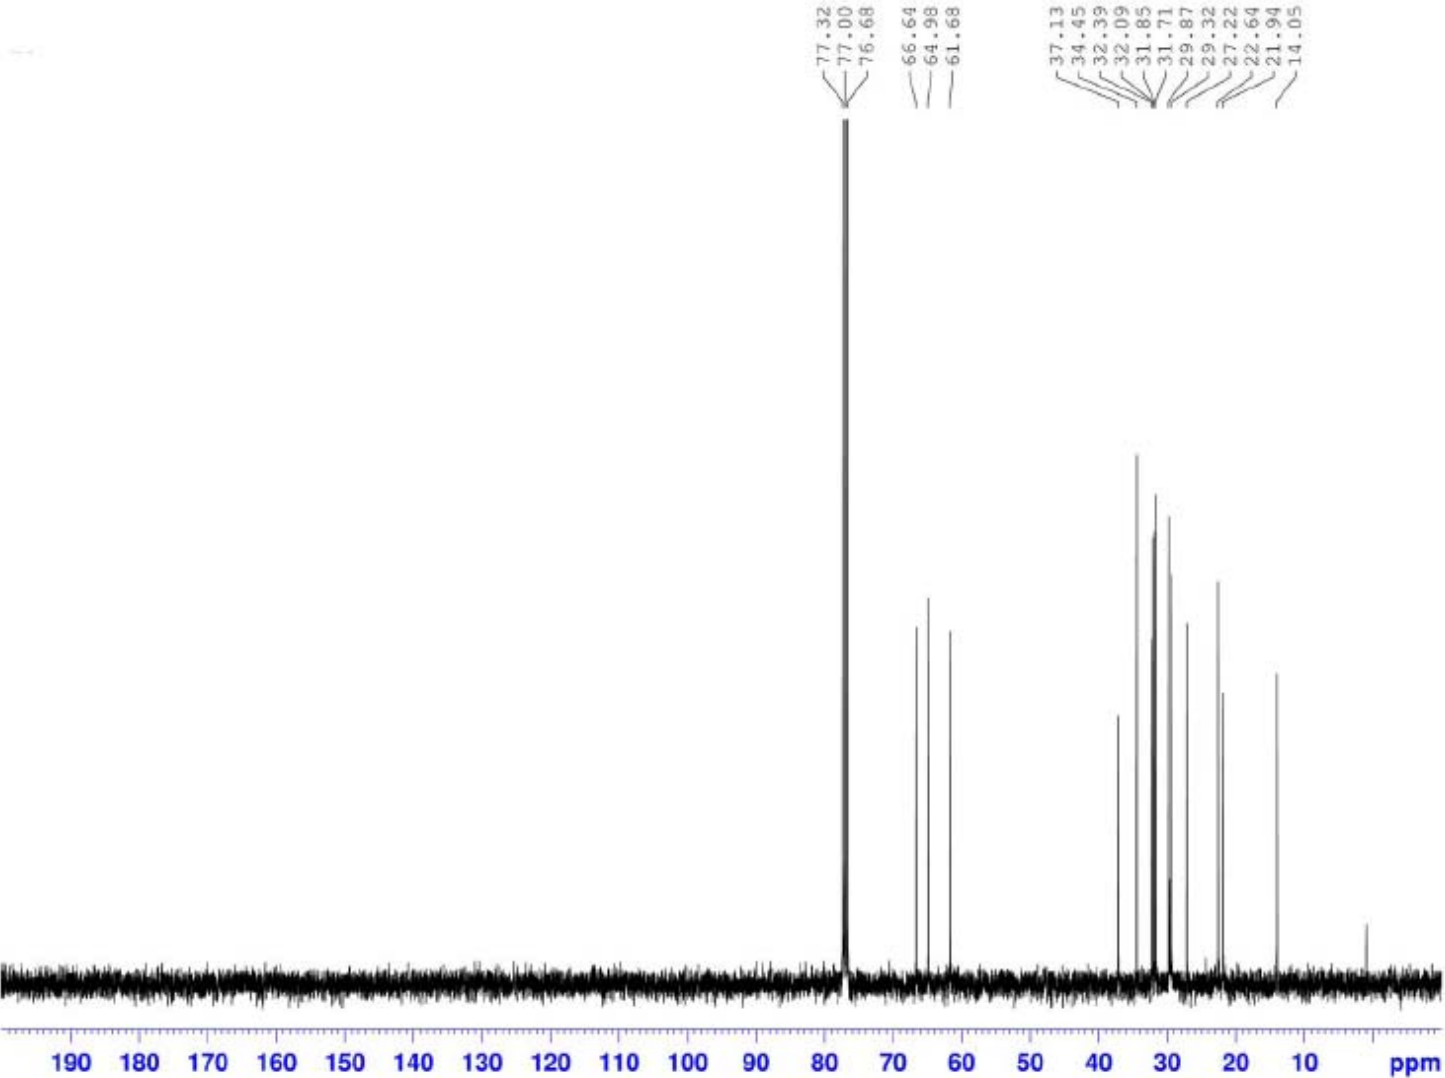

2D-COSY of compound **16**:

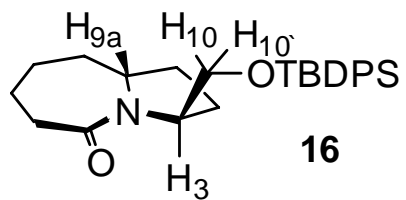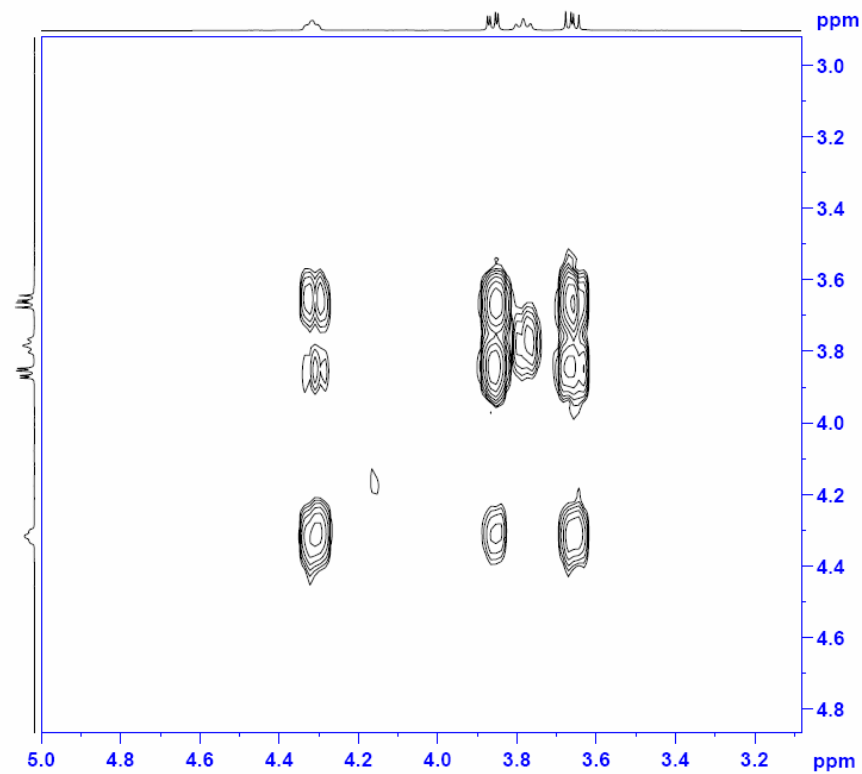

<sup>1</sup>H-<sup>1</sup>H COSY

2D-NOESY of compound **16**:

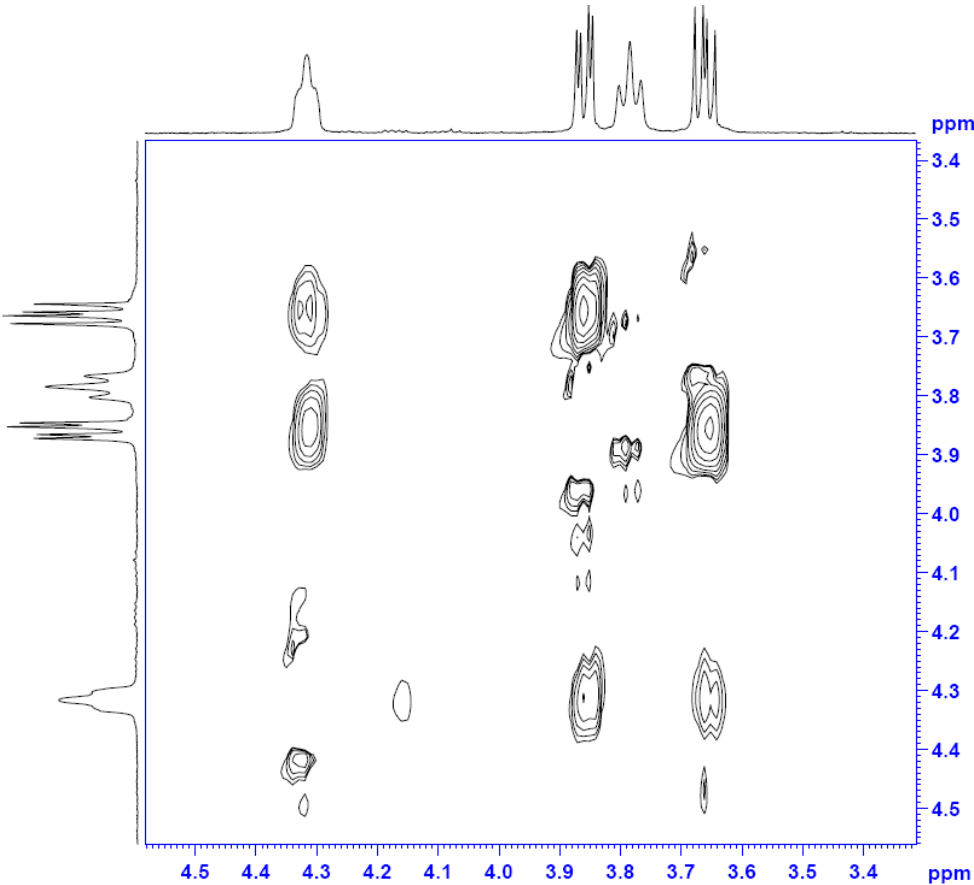

2D NOESY

1D-GOESY of compound **16**:

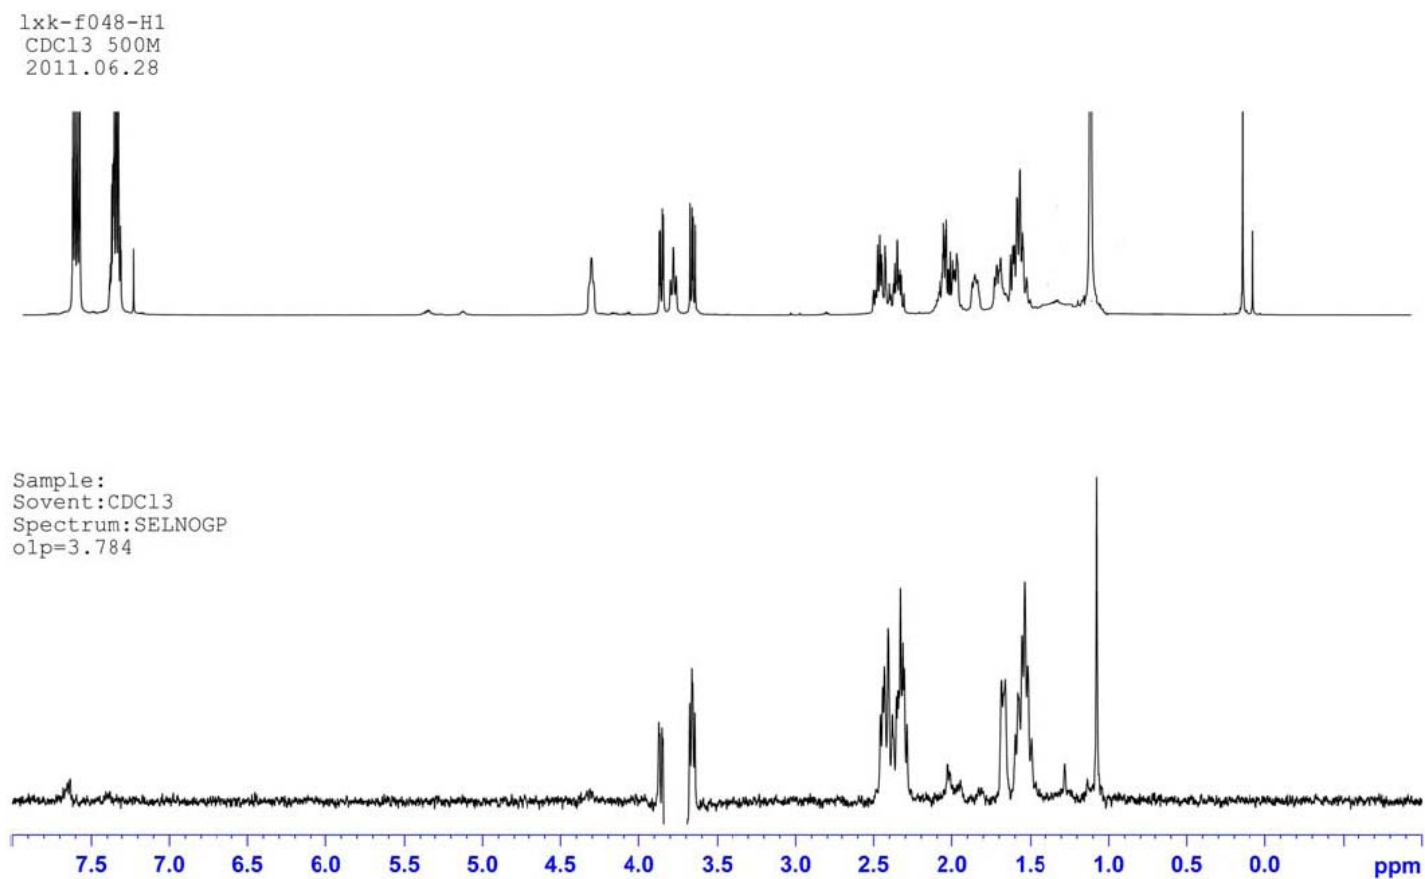

1D GOESY
